# Supplementary material for: Who participates in computer science education studies? A literature review on K-12 subjects
Source: PeerJ Comput Sci. 2021 Dec 21;7:e807. doi: 10.7717/peerj-cs.807 (PMC8725654; doi:10.7717/peerj-cs.807)
Supplement: Supplemental Information 1 [file peerj-cs-07-807-s001.xlsx]

## Sheet: All papers
conference identifier	venue	year	page_range	pages_number	heading	title	authors	electronic_edition	Qualifies for Phase 1 (larger than 6 pages)
conf/icer/icer2014	ICER	2014	59-66	8	Recursion	A structured approach to teaching recursion using cargo-bot.	Elynn Lee; Victoria Shan; Bradley Beth; Calvin Lin	https://doi.org/10.1145/2632320.2632356	TRUE
conf/icer/icer2014	ICER	2014	19-26	8	Reviews	A systematic review of approaches for teaching introductory programming and their influence on success.	Arto Vihavainen; Jonne Airaksinen; Christopher Watson	https://doi.org/10.1145/2632320.2632349	TRUE
conf/icer/icer2014	ICER	2014	107-114	8	Attitudes	Academic integrity perceptions regarding computing assessments and essays.	Simon; Beth Cook; Judy Sheard; Angela Carbone; Chris W. Johnson	https://doi.org/10.1145/2632320.2632342	TRUE
conf/icer/icer2014	ICER	2014	99-106	8	Understanding artifacts	Computer programs, dialogicality, and intentionality.	Josh Tenenberg; Yifat Ben-David Kolikant	https://doi.org/10.1145/2632320.2632351	TRUE
conf/icer/icer2014	ICER	2014	75-82	8	Outreach	Diversifying high school students' views about computing with electronic textiles.	Kristin A. Searle; Deborah A. Fields; Debora A. Lui; Yasmin B. Kafai	https://doi.org/10.1145/2632320.2632352	TRUE
conf/icer/icer2014	ICER	2014	67-74	8	Recursion	Exploring variation in students' correct traces of linear recursion.	Colleen M. Lewis	https://doi.org/10.1145/2632320.2632355	TRUE
conf/icer/icer2014	ICER	2014	43534	8	New approaches	Eye tracking in computing education.	Teresa Busjahn; Carsten Schulte; Bonita Sharif; Simon; Andrew Begel; Michael Hansen; Roman Bednarik; Paul Orlov; Petri Ihantola; Galina Shchekotova; Maria Antropova	https://doi.org/10.1145/2632320.2632344	TRUE
conf/icer/icer2014	ICER	2014	91-98	8	Understanding artifacts	Graduating students' designs: through a phenomenographic lens.	Lynda Thomas; Anna Eckerdal; Robert McCartney; Jan Erik Moström; Kate Sanders; Carol Zander	https://doi.org/10.1145/2632320.2632353	TRUE
conf/icer/icer2014	ICER	2014	115-122	8	Attitudes	How CS undergraduates make course choices.	Michael Hewner	https://doi.org/10.1145/2632320.2632345	TRUE
conf/icer/icer2014	ICER	2014	43787	8	New approaches	In-flow peer-review of tests in test-first programming.	Joe Gibbs Politz; Shriram Krishnamurthi; Kathi Fisler	https://doi.org/10.1145/2632320.2632347	TRUE
conf/icer/icer2014	ICER	2014	43-50	8	Novices / CS1	Investigating novice programming mistakes: educator beliefs vs. student data.	Neil C. C. Brown; Amjad AlTadmri	https://doi.org/10.1145/2632320.2632343	TRUE
conf/icer/icer2014	ICER	2014	131-138	8	Instruments	Measuring cognitive load in introductory CS: adaptation of an instrument.	Briana B. Morrison; Brian Dorn; Mark Guzdial	https://doi.org/10.1145/2632320.2632348	TRUE
conf/icer/icer2014	ICER	2014	123-130	8	Instruments	Measuring enrichment: the assembly and validation of an instrument to assess student self-beliefs in CS1.	Michael James Scott; Gheorghita Ghinea	https://doi.org/10.1145/2632320.2632350	TRUE
conf/icer/icer2014	ICER	2014	83-90	8	Outreach	New enactments of mentoring and activism: U.S. women of color in computing education and careers.	Apriel K. Hodari; Maria Ong; Lily T. Ko; Rachel R. Kachchaf	https://doi.org/10.1145/2632320.2632357	TRUE
conf/icer/icer2014	ICER	2014	145-146	2	Doctoral consortium	Adaptive parsons problems with discourse rules.	Barbara J. Ericson	https://doi.org/10.1145/2632320.2632324	FALSE
conf/icer/icer2014	ICER	2014	51-58	8	Novices / CS1	Predicting student success using fine grain clicker data.	Leo Porter; Daniel Zingaro; Raymond Lister	https://doi.org/10.1145/2632320.2632354	TRUE
conf/icer/icer2014	ICER	2014	149-150	2	Doctoral consortium	Allegories for learning abstract programming concepts.	Jeisson Hidalgo-Céspedes	https://doi.org/10.1145/2632320.2632326	FALSE
conf/icer/icer2014	ICER	2014	35-42	8	Novices / CS1	The recurring rainfall problem.	Kathi Fisler	https://doi.org/10.1145/2632320.2632346	TRUE
conf/icer/icer2014	ICER	2014	27-34	8	Reviews	Theoretical underpinnings of computing education research: what is the evidence?	Lauri Malmi; Judy Sheard; Simon; Roman Bednarik; Juha Helminen; Päivi Kinnunen; Ari Korhonen; Niko Myller; Juha Sorva; Ahmad Taherkhani	https://doi.org/10.1145/2632320.2632358	TRUE
conf/icer/icer2014	ICER	2014	147-148	2	Doctoral consortium	Big data and data management: a topic for secondary computing education.	Andreas Grillenberger	https://doi.org/10.1145/2632320.2632325	FALSE
conf/icer/icer2014	ICER	2014	155-156	2	Doctoral consortium	Cartographies of practice.	Daniel Knox	https://doi.org/10.1145/2632320.2632329	FALSE
conf/icer/icer2014	ICER	2014	151-152	2	Doctoral consortium	Computational thinking curriculum development for upper elementary school classes.	Charlotte Hill	https://doi.org/10.1145/2632320.2632327	FALSE
conf/icer/icer2014	ICER	2014	143-144	2	Doctoral consortium	CS outreach to high school enrollment: bridging the gap.	Veronica Cateté	https://doi.org/10.1145/2632320.2632323	FALSE
conf/icer/icer2014	ICER	2014	163-164	2	Doctoral consortium	Developing students' problem-posing skills.	Shitanshu Mishra	https://doi.org/10.1145/2632320.2632333	FALSE
conf/icer/icer2014	ICER	2014	167-168	2	Doctoral consortium	Evaluating diversity initiatives in computer science: do they have unintended side-effects?	Elizabeth Patitsas	https://doi.org/10.1145/2632320.2632335	FALSE
conf/icer/icer2014	ICER	2014	173-174	2	Doctoral consortium	How can we improve notational expertise?	Alistair Stead	https://doi.org/10.1145/2632320.2632341	FALSE
conf/icer/icer2014	ICER	2014	141-142	2	Doctoral consortium	Identification and measurement of computer science competencies in the area of software development, software engineering and programming.	Kathrin Bröker	https://doi.org/10.1145/2632320.2632322	FALSE
conf/icer/icer2014	ICER	2014	169-170	2	Doctoral consortium	Physical computing in computer science education.	Mareen Przybylla	https://doi.org/10.1145/2632320.2632336	FALSE
conf/icer/icer2014	ICER	2014	159-160	2	Doctoral consortium	Promoting constructive mindsets for overcoming failure in computer science education.	Emily Lovell	https://doi.org/10.1145/2632320.2632331	FALSE
conf/icer/icer2014	ICER	2014	139-140	2	Doctoral consortium	Self-explaining from video recordings as a methodology for learning programming.	Viviane Cristina Oliveira Aureliano	https://doi.org/10.1145/2632320.2632321	FALSE
conf/icer/icer2014	ICER	2014	153-154	2	Doctoral consortium	The effect of robotics activities on students' learning and attitudes.	Fatima Kaloti-Hallak	https://doi.org/10.1145/2632320.2632328	FALSE
conf/icer/icer2014	ICER	2014	43467	2	Keynote address	Unlocking learners' evaluative skills: a peer review perspective.	David J. Nicol	https://doi.org/10.1145/2632320.2632359	FALSE
conf/icer/icer2014	ICER	2014	165-166	2	Doctoral consortium	User groups: community collaborative learning.	Daniel deOliveira; Ian Utting	https://doi.org/10.1145/2632320.2632334	FALSE
conf/icer/icer2014	ICER	2014	171-172	2	Doctoral consortium	User models of reasoning and understanding in app inventor.	Mark Sherman	https://doi.org/10.1145/2632320.2632340	FALSE
conf/icer/icer2014	ICER	2014	157-158	2	Doctoral consortium	Using case-based reasoning to improve the quality of feedback generated by automated grading systems.	Angelo Kyrilov	https://doi.org/10.1145/2632320.2632330	FALSE
conf/icer/icer2014	ICER	2014	161-162	2	Doctoral consortium	What pedagogical content knowledge competencies do computer science pre-service teachers have?	Melanie Margaritis	https://doi.org/10.1145/2632320.2632332	FALSE
conf/icer/icer2015	ICER	2015	199-206	8	Papers: Designing and Evaluating Curricula	A Multi-Institutional Study of Learning via Student Involvement in Humanitarian Free and Open Source Software Projects.	Gregory W. Hislop; Heidi J. C. Ellis; S. Monisha Pulimood; Becka Morgan; Suzanne Mello-Stark; Ben Coleman; Cam Macdonell	https://doi.org/10.1145/2787622.2787726	TRUE
conf/icer/icer2015	ICER	2015	81-89	9	Papers: Understanding and Informing Policy	ACM Curriculum Reports: A Pedagogic Perspective.	Sebastian Dziallas; Sally Fincher	https://doi.org/10.1145/2787622.2787714	TRUE
conf/icer/icer2015	ICER	2015	131-139	9	Papers: Compilation Behavior Metrics	Aggregate Compilation Behavior: Findings and Implications from 27, 698 Users.	Matthew C. Jadud; Brian Dorn	https://doi.org/10.1145/2787622.2787718	TRUE
conf/icer/icer2015	ICER	2015	217-225	9	Papers: Alternative Approaches	An Empirical Study of In-Class Laboratories on Student Learning of Linear Data Structures.	Sarah Smith Heckman	https://doi.org/10.1145/2787622.2787713	TRUE
conf/icer/icer2015	ICER	2015	169-178	10	Papers: E-Books	Analysis of Interactive Features Designed to Enhance Learning in an Ebook.	Barbara J. Ericson; Mark J. Guzdial; Briana B. Morrison	https://doi.org/10.1145/2787622.2787731	TRUE
conf/icer/icer2015	ICER	2015	285-286	2	Doctoral Consortium	A Competence Graph to Derive Individual Learning Paths.	Daniela Zehetmeier	https://doi.org/10.1145/2787622.2787753	FALSE
conf/icer/icer2015	ICER	2015	31-39	9	Papers: Social and Cultural Dynamics	Boys' Needlework: Understanding Gendered and Indigenous Perspectives on Computing and Crafting with Electronic Textiles.	Kristin A. Searle; Yasmin B. Kafai	https://doi.org/10.1145/2787622.2787724	TRUE
conf/icer/icer2015	ICER	2015	91-99	9	Papers: Blocks vs. Text	Comparing Textual and Block Interfaces in a Novice Programming Environment.	Thomas W. Price; Tiffany Barnes	https://doi.org/10.1145/2787622.2787712	TRUE
conf/icer/icer2015	ICER	2015	237-246	10	Papers: Alternative Approaches	Comparing the Effectiveness of Online Learning Approaches on CS1 Learning Outcomes.	Michael J. Lee; Andrew J. Ko	https://doi.org/10.1145/2787622.2787709	TRUE
conf/icer/icer2015	ICER	2015	71-80	10	Papers: Understanding and Informing Policy	Does Outreach Impact Choices of Major for Underrepresented Undergraduate Students?	Monica McGill; Adrienne Decker; Amber Settle	https://doi.org/10.1145/2787622.2787711	TRUE
conf/icer/icer2015	ICER	2015	161-168	8	Papers: Identity and Affect	Exploring Changes in Computer Science Students' Implicit Theories of Intelligence Across the Semester.	Abraham E. Flanigan; Markeya S. Peteranetz; Duane F. Shell; Leen-Kiat Soh	https://doi.org/10.1145/2787622.2787722	TRUE
conf/icer/icer2015	ICER	2015	121-130	10	Papers: Compilation Behavior Metrics	Exploring Machine Learning Methods to Automatically Identify Students in Need of Assistance.	Alireza Ahadi; Raymond Lister; Heikki Haapala; Arto Vihavainen	https://doi.org/10.1145/2787622.2787717	TRUE
conf/icer/icer2015	ICER	2015	265-266	2	Doctoral Consortium	A Prescriptive Software Process for Academic Scenarios.	Maira Marques	https://doi.org/10.1145/2787622.2787743	FALSE
conf/icer/icer2015	ICER	2015	111-119	9	Papers: Blocks vs. Text	Fourth Grade Students Reading Block-Based Programs: Predictions, Visual Cues, and Affordances.	Hilary A. Dwyer; Charlotte Hill; Alexandria K. Hansen; Ashley Iveland; Diana Franklin; Danielle Harlow	https://doi.org/10.1145/2787622.2787729	TRUE
conf/icer/icer2015	ICER	2015	207-216	10	Papers: Designing and Evaluating Curricula	Grounding Computational Thinking Skill Acquisition Through Contextualized Instruction.	Hilarie Nickerson; Catharine Brand; Alexander Repenning	https://doi.org/10.1145/2787622.2787720	TRUE
conf/icer/icer2015	ICER	2015	179-188	10	Papers: E-Books	How Do Students Use Program Visualizations within an Interactive Ebook?	Teemu Sirkiä; Juha Sorva	https://doi.org/10.1145/2787622.2787719	TRUE
conf/icer/icer2015	ICER	2015	41-50	10	Papers: Social and Cultural Dynamics	How Equity and Inequity Can Emerge in Pair Programming.	Colleen M. Lewis; Niral Shah	https://doi.org/10.1145/2787622.2787716	TRUE
conf/icer/icer2015	ICER	2015	227-236	10	Papers: Alternative Approaches	Learning in Distributed Low-Stakes Teams.	Stephen MacNeil; Celine Latulipe; Aman Yadav	https://doi.org/10.1145/2787622.2787727	TRUE
conf/icer/icer2015	ICER	2015	259-260	2	Doctoral Consortium	Adaptive Parsons Problems with Discourse Rules.	Barbara J. Ericson	https://doi.org/10.1145/2787622.2787740	FALSE
conf/icer/icer2015	ICER	2015	61-69	9	Papers: Understanding and Informing Policy	Scaling up Women in Computing Initiatives: What Can We Learn from a Public Policy Perspective?	Elizabeth Patitsas; Michelle Craig; Steve M. Easterbrook	https://doi.org/10.1145/2787622.2787725	TRUE
conf/icer/icer2015	ICER	2015	151-159	9	Papers: Identity and Affect	School/Work: Development of Computing Students' Professional Identity at University.	Robert McCartney; Kate Sanders	https://doi.org/10.1145/2787622.2787732	TRUE
conf/icer/icer2015	ICER	2015	13-20	8	Papers: Cognition and Procrastination	Spatial Skills Training in Introductory Computing.	Stephen Cooper; Karen Wang; Maya Israni; Sheryl Sorby	https://doi.org/10.1145/2787622.2787728	TRUE
conf/icer/icer2015	ICER	2015	21-29	9	Papers: Cognition and Procrastination	Subgoals, Context, and Worked Examples in Learning Computing Problem Solving.	Briana B. Morrison; Lauren E. Margulieux; Mark Guzdial	https://doi.org/10.1145/2787622.2787733	TRUE
conf/icer/icer2015	ICER	2015	43535	9	Papers: Cognition and Procrastination	The Effects of Procrastination Interventions on Programming Project Success.	Joshua Martin; Stephen H. Edwards; Clifford A. Shaffer	https://doi.org/10.1145/2787622.2787730	TRUE
conf/icer/icer2015	ICER	2015	141-150	10	Papers: Compilation Behavior Metrics	The Normalized Programming State Model: Predicting Student Performance in Computing Courses Based on Programming Behavior.	Adam S. Carter; Christopher D. Hundhausen; Olusola O. Adesope	https://doi.org/10.1145/2787622.2787710	TRUE
conf/icer/icer2015	ICER	2015	101-110	10	Papers: Blocks vs. Text	Using Commutative Assessments to Compare Conceptual Understanding in Blocks-based and Text-based Programs.	David Weintrop; Uri Wilensky	https://doi.org/10.1145/2787622.2787721	TRUE
conf/icer/icer2015	ICER	2015	51-60	10	Papers: Social and Cultural Dynamics	Using Distributed Cognition Theory to Analyze Collaborative Computer Science Learning.	Elise Deitrick; R. Benjamin Shapiro; Matthew P. Ahrens; Rebecca Fiebrink; Paul D. Lehrman; Saad Farooq	https://doi.org/10.1145/2787622.2787715	TRUE
conf/icer/icer2015	ICER	2015	189-197	9	Papers: Designing and Evaluating Curricula	What Are We Teaching?: Automated Evaluation of CS Curricula Content Using Topic Modeling.	Jean Michel Rouly; Huzefa Rangwala; Aditya Johri	https://doi.org/10.1145/2787622.2787723	TRUE
conf/icer/icer2015	ICER	2015	257-258	2	Doctoral Consortium	Characterizing Graduateness in Computing Education.	Sebastian Dziallas	https://doi.org/10.1145/2787622.2787739	FALSE
conf/icer/icer2015	ICER	2015	283-284	2	Doctoral Consortium	Comparing Text-based, Blocks-based, and Hybrid Blocks/Text Programming Tools.	David Weintrop	https://doi.org/10.1145/2787622.2787752	FALSE
conf/icer/icer2015	ICER	2015	267-268	2	Doctoral Consortium	Computer Science Is Different!: Educational Psychology Experiments Do Not Reliably Replicate in Programming Domain.	Briana B. Morrison	https://doi.org/10.1145/2787622.2787744	FALSE
conf/icer/icer2015	ICER	2015	281-282	2	Doctoral Consortium	Computer Science Meets Social Studies: Embedding CS in the Study of Locally Grounded Civic Issues.	Sarah Jane Van Wart	https://doi.org/10.1145/2787622.2787751	FALSE
conf/icer/icer2015	ICER	2015	277-278	2	Doctoral Consortium	Designing a Data-Driven Tutor Authoring Tool for CS Educators.	Kelly Rivers	https://doi.org/10.1145/2787622.2787749	FALSE
conf/icer/icer2015	ICER	2015	1	1	Keynote Address	Empowering Makers in the Cognitive Era.	Jim Spohrer	https://doi.org/10.1145/2787622.2787623	FALSE
conf/icer/icer2015	ICER	2015	271-272	2	Doctoral Consortium	Exploring Learning Analytics for Computing Education.	Daniel Olivares	https://doi.org/10.1145/2787622.2787746	FALSE
conf/icer/icer2015	ICER	2015	275-276	2	Doctoral Consortium	Integrating Intelligent Feedback into Block Programming Environments.	Thomas W. Price	https://doi.org/10.1145/2787622.2787748	FALSE
conf/icer/icer2015	ICER	2015	249-250	2	Doctoral Consortium	Investigating Novice Programmers' Plan Composition Strategies.	Francisco Enrique Vicente G. Castro	https://doi.org/10.1145/2787622.2787735	FALSE
conf/icer/icer2015	ICER	2015	263-264	2	Doctoral Consortium	Learning Together: Expanding the One-To-One ITS Model for Computer Science Education.	Rachel Harsley	https://doi.org/10.1145/2787622.2787742	FALSE
conf/icer/icer2015	ICER	2015	247-248	2	Doctoral Consortium	Leveraging Narrative Interactivity to Foster Computer Science Identities.	Philip Sheridan Buffum	https://doi.org/10.1145/2787622.2787734	FALSE
conf/icer/icer2015	ICER	2015	269-270	2	Doctoral Consortium	Measuring Knowledge of Misconceptions in Computer Science Education.	Laura Ohrndorf	https://doi.org/10.1145/2787622.2787745	FALSE
conf/icer/icer2015	ICER	2015	255-256	2	Doctoral Consortium	Modeling-First Approach for Computer Science Instruction.	Karen Doore	https://doi.org/10.1145/2787622.2787738	FALSE
conf/icer/icer2015	ICER	2015	253-254	2	Doctoral Consortium	On Pre-requisite Skills for Universal Computational Thinking Education.	Elizabeth C. Cole	https://doi.org/10.1145/2787622.2787737	FALSE
conf/icer/icer2015	ICER	2015	273-274	2	Doctoral Consortium	Privilege and Computer Science Education: How can we level the playing field?	Miranda C. Parker	https://doi.org/10.1145/2787622.2787747	FALSE
conf/icer/icer2015	ICER	2015	279-280	2	Doctoral Consortium	Supporting Elementary School Computer Science Learning with Interactive Spoken Dialogue Agents.	Jennifer Tsan	https://doi.org/10.1145/2787622.2787750	FALSE
conf/icer/icer2015	ICER	2015	251-252	2	Doctoral Consortium	Understanding Collaborative Computational Thinking.	Bushra Chowdhury	https://doi.org/10.1145/2787622.2787736	FALSE
conf/icer/icer2015	ICER	2015	261-262	2	Doctoral Consortium	Worked Examples with Errors for Computer Science Education.	Jean Griffin	https://doi.org/10.1145/2787622.2787741	FALSE
conf/icer/icer2016	ICER	2016	23-32	10	Papers: Perceptions of CS Study and Careers	"I Don't Code All Day": Fitting in Computer Science When the Stereotypes Don't Fit.	Colleen M. Lewis; Ruth E. Anderson; Ken Yasuhara	https://doi.org/10.1145/2960310.2960332	TRUE
conf/icer/icer2016	ICER	2016	153-159	7	Papers: Situating Computing Education Research	A Picture of the Growing ICER Community.	Simon	https://doi.org/10.1145/2960310.2960323	TRUE
conf/icer/icer2016	ICER	2016	251-259	9	Papers: Tools, Techniques and Learning	A Study of Code Design Skills in Novice Programmers using the SOLO taxonomy.	Cruz Izu; Amali Weerasinghe; Cheryl Pope	https://doi.org/10.1145/2960310.2960324	TRUE
conf/icer/icer2016	ICER	2016	73-81	9	Papers: Understanding How Students Code	Analyzing Student Practices in Theory of Computation in Light of Distributed Cognition Theory.	Maria Knobelsdorf; Christiane Frede	https://doi.org/10.1145/2960310.2960331	TRUE
conf/icer/icer2016	ICER	2016	181-190	10	Papers: Learning Experiences, Curriculum and Resources	Aspects of Graduateness in Computing Students' Narratives.	Sebastian Dziallas; Sally Fincher	https://doi.org/10.1145/2960310.2960317	TRUE
conf/icer/icer2016	ICER	2016	103-111	9	Papers: Assessment	Benchmarking Introductory Programming Exams: Some Preliminary Results.	Simon; Judy Sheard; Daryl J. D'Souza; Peter Klemperer; Leo Porter; Juha Sorva; Martijn Stegeman; Daniel Zingaro	https://doi.org/10.1145/2960310.2960337	TRUE
conf/icer/icer2016	ICER	2016	171-180	10	Papers: Learning Experiences, Curriculum and Resources	Computer Science Principles: Impacting Student Motivation & Learning Within and Beyond the Classroom.	Kara Alexandra Behnke; Brittany Ann Kos; John K. Bennett	https://doi.org/10.1145/2960310.2960336	TRUE
conf/icer/icer2016	ICER	2016	63-72	10	Papers: Understanding How Students Code	Control-Flow-Only Abstract Syntax Trees for Analyzing Students' Programming Progress.	David Hovemeyer; Arto Hellas; Andrew Petersen; Jaime Spacco	https://doi.org/10.1145/2960310.2960326	TRUE
conf/icer/icer2016	ICER	2016	241-250	10	Papers: Tools, Techniques and Learning	Distractors in Parsons Problems Decrease Learning Efficiency for Young Novice Programmers.	Kyle James Harms; Jason Chen; Caitlin L. Kelleher	https://doi.org/10.1145/2960310.2960314	TRUE
conf/icer/icer2016	ICER	2016	33-42	10	Papers: Programming Tools and IDEs	Evaluation of a Frame-based Programming Editor.	Thomas W. Price; Neil C. C. Brown; Dragan Lipovac; Tiffany Barnes; Michael Kölling	https://doi.org/10.1145/2960310.2960319	TRUE
conf/icer/icer2016	ICER	2016	113-121	9	Papers: Assessment	Evidence That Computer Science Grades Are Not Bimodal.	Elizabeth Patitsas; Jesse Berlin; Michelle Craig; Steve M. Easterbrook	https://doi.org/10.1145/2960310.2960312	TRUE
conf/icer/icer2016	ICER	2016	231-239	9	Papers: Tools, Techniques and Learning	Examining the Value of Analogies in Introductory Computing.	Yingjun Cao; Leo Porter; Daniel Zingaro	https://doi.org/10.1145/2960310.2960313	TRUE
conf/icer/icer2016	ICER	2016	43-52	10	Papers: Programming Tools and IDEs	Flipping the Assessment of Cognitive Load: Why and How.	Raina Mason; Simon; Graham Cooper; Barry Wilks	https://doi.org/10.1145/2960310.2960321	TRUE
conf/icer/icer2016	ICER	2016	53-61	9	Papers: Programming Tools and IDEs	How Kids Code and How We Know: An Exploratory Study on the Scratch Repository.	Efthimia Aivaloglou; Felienne Hermans	https://doi.org/10.1145/2960310.2960325	TRUE
conf/icer/icer2016	ICER	2016	191-200	10	Papers: Learning Experiences, Curriculum and Resources	Identifying Design Principles for CS Teacher Ebooks through Design-Based Research.	Barbara J. Ericson; Kantwon Rogers; Miranda C. Parker; Briana B. Morrison; Mark Guzdial	https://doi.org/10.1145/2960310.2960335	TRUE
conf/icer/icer2016	ICER	2016	143-151	9	Papers: Errors and At Risk Students	Learning Curve Analysis for Programming: Which Concepts do Students Struggle With?	Kelly Rivers; Erik Harpstead; Kenneth R. Koedinger	https://doi.org/10.1145/2960310.2960333	TRUE
conf/icer/icer2016	ICER	2016	221-230	10	Papers: Influences on Student Performance	Learning Loops: A Replication Study Illuminates Impact of HS Courses.	Briana B. Morrison; Adrienne Decker; Lauren E. Margulieux	https://doi.org/10.1145/2960310.2960330	TRUE
conf/icer/icer2016	ICER	2016	211-220	10	Papers: Influences on Student Performance	Learning to Program: Gender Differences and Interactive Effects of Students' Motivation, Goals, and Self-Efficacy on Performance.	Alex Lishinski; Aman Yadav; Jon Good; Richard J. Enbody	https://doi.org/10.1145/2960310.2960329	TRUE
conf/icer/icer2016	ICER	2016	123-131	9	Papers: Errors and At Risk Students	Lightweight, Early Identification of At-Risk CS1 Students.	Soohyun Nam Liao; Daniel Zingaro; Michael A. Laurenzano; William G. Griswold; Leo Porter	https://doi.org/10.1145/2960310.2960315	TRUE
conf/icer/icer2016	ICER	2016	271-272	2	Doctoral Consortium	Accounting for the Role of Policy in the Underrepresentation of Women in Computer Science.	Elizabeth Patitsas	https://doi.org/10.1145/2960310.2960343	FALSE
conf/icer/icer2016	ICER	2016	161-169	9	Papers: Situating Computing Education Research	Methodological Rigor and Theoretical Foundations of CS Education Research.	Alex Lishinski; Jon Good; Phil Sands; Aman Yadav	https://doi.org/10.1145/2960310.2960328	TRUE
conf/icer/icer2016	ICER	2016	1	1	Keynote Address	Affective and Cognitive - Designing Educational Experiences that Transform.	Richard Buckland	https://doi.org/10.1145/2960310.2960311	FALSE
conf/icer/icer2016	ICER	2016	13-21	9	Papers: Perceptions of CS Study and Careers	Perceived Instrumentality and Career Aspirations in CS1 Courses: Change and Relationships with Achievement.	Markeya S. Peteranetz; Abraham E. Flanigan; Duane F. Shell; Leen-Kiat Soh	https://doi.org/10.1145/2960310.2960320	TRUE
conf/icer/icer2016	ICER	2016	93-101	9	Papers: Assessment	Replication, Validation, and Use of a Language Independent CS1 Knowledge Assessment.	Miranda C. Parker; Mark Guzdial; Shelly Engelman	https://doi.org/10.1145/2960310.2960316	TRUE
conf/icer/icer2016	ICER	2016	133-141	9	Papers: Errors and At Risk Students	Some Trouble with Transparency: An Analysis of Student Errors with Object-oriented Python.	Craig S. Miller; Amber Settle	https://doi.org/10.1145/2960310.2960327	TRUE
conf/icer/icer2016	ICER	2016	83-91	9	Papers: Understanding How Students Code	The Role of Self-Regulation in Programming Problem Solving Process and Success.	Dastyni Loksa; Andrew Jensen Ko	https://doi.org/10.1145/2960310.2960334	TRUE
conf/icer/icer2016	ICER	2016	43535	9	Papers: Perceptions of CS Study and Careers	When Everyone Knows CS is the Best Major: Decisions about CS in an Indian context.	Michael Hewner; Shitanshu Mishra	https://doi.org/10.1145/2960310.2960318	TRUE
conf/icer/icer2016	ICER	2016	201-209	9	Papers: Influences on Student Performance	With a Little Help From My Friends: An Empirical Study of the Interplay of Students' Social Activities, Programming Activities, and Course Success.	Adam S. Carter; Christopher D. Hundhausen	https://doi.org/10.1145/2960310.2960322	TRUE
conf/icer/icer2016	ICER	2016	267-268	2	Doctoral Consortium	Bringing the Innovations in Data Management to Secondary CS Education.	Andreas Grillenberger	https://doi.org/10.1145/2960310.2960341	FALSE
conf/icer/icer2016	ICER	2016	261-262	2	Doctoral Consortium	Cognitive, Affective, and Dispositional Components of Learning Programming.	Alex Lishinski	https://doi.org/10.1145/2960310.2960338	FALSE
conf/icer/icer2016	ICER	2016	277-278	2	Doctoral Consortium	Computational Thinking as a Computer Science Education Framework and the Related Effects on Gender Equity.	Jon Good	https://doi.org/10.1145/2960310.2960346	FALSE
conf/icer/icer2016	ICER	2016	269-270	2	Doctoral Consortium	Dynamically Adaptive Parsons Problems.	Barbara J. Ericson	https://doi.org/10.1145/2960310.2960342	FALSE
conf/icer/icer2016	ICER	2016	263-264	2	Doctoral Consortium	Early Identification of Novice Programmers' Challenges in Coding Using Machine Learning Techniques.	Alireza Ahadi	https://doi.org/10.1145/2960310.2960339	FALSE
conf/icer/icer2016	ICER	2016	291-292	2	Doctoral Consortium	Examining Graduateness through Narratives.	Sebastian Dziallas	https://doi.org/10.1145/2960310.2960353	FALSE
conf/icer/icer2016	ICER	2016	275-276	2	Doctoral Consortium	Geospatial Analysis of Computer Science Course Offerings in Wisconsin Public High Schools.	Heather Bort	https://doi.org/10.1145/2960310.2960345	FALSE
conf/icer/icer2016	ICER	2016	295-296	2	Doctoral Consortium	Identify and Help At-Risk Students Before It Is Late.	Soohyun Nam Liao	https://doi.org/10.1145/2960310.2960355	FALSE
conf/icer/icer2016	ICER	2016	289-290	2	Doctoral Consortium	Improving Scientific Inquiry through Physical Computing.	Sandra Schulz	https://doi.org/10.1145/2960310.2960352	FALSE
conf/icer/icer2016	ICER	2016	293-294	2	Doctoral Consortium	Improving Students' Knowledge Integration in Data Structures.	Shitanshu Mishra	https://doi.org/10.1145/2960310.2960354	FALSE
conf/icer/icer2016	ICER	2016	283-284	2	Doctoral Consortium	Learning and Collaboration in Physical Computing.	Kayla DesPortes	https://doi.org/10.1145/2960310.2960349	FALSE
conf/icer/icer2016	ICER	2016	279-280	2	Doctoral Consortium	Mixed Methods for the Assessment and Incorporation of Computational Thinking in K-12 and Higher Education.	Joshua Levi Weese	https://doi.org/10.1145/2960310.2960347	FALSE
conf/icer/icer2016	ICER	2016	285-286	2	Doctoral Consortium	Mobile Learning Application for Computer Science Students: A Transactional Distance Perspective.	Pakapan Limtrairut; Stuart Marshall; Peter Andreae	https://doi.org/10.1145/2960310.2960350	FALSE
conf/icer/icer2016	ICER	2016	273-274	2	Doctoral Consortium	Pedagogy and Measurement of Program Planning Skills.	Francisco Enrique Vicente G. Castro	https://doi.org/10.1145/2960310.2960344	FALSE
conf/icer/icer2016	ICER	2016	287-288	2	Doctoral Consortium	Situating Physical Computing in Secondary CS Education.	Mareen Przybylla	https://doi.org/10.1145/2960310.2960351	FALSE
conf/icer/icer2016	ICER	2016	281-282	2	Doctoral Consortium	Teaching: Learning of Troubleshooting Skills for Computer Science Undergraduates.	Kavya Alse	https://doi.org/10.1145/2960310.2960348	FALSE
conf/icer/icer2016	ICER	2016	265-266	2	Doctoral Consortium	The Role of Spatial Reasoning in Learning Computer Science.	Amber Solomon	https://doi.org/10.1145/2960310.2960340	FALSE
conf/icer/icer2017	ICER	2017	217-225	9	Session 9: Validating Assessments & Dual Modality Teaching	An Instrument to Assess Self-Efficacy in Introductory Algorithms Courses.	Holger Danielsiek; Laura Toma; Jan Vahrenhold	https://doi.org/10.1145/3105726.3106171	TRUE
conf/icer/icer2017	ICER	2017	245-253	9	Session 10: Outside the Conventional Classroom	Barriers Faced by Coding Bootcamp Students.	Kyle Thayer; Andrew J. Ko	https://doi.org/10.1145/3105726.3106176	TRUE
conf/icer/icer2017	ICER	2017	200-208	9	Session 8: Students' Use of Time in Programming	Comparison of Time Metrics in Programming.	Juho Leinonen; Leo Leppänen; Petri Ihantola; Arto Hellas	https://doi.org/10.1145/3105726.3106181	TRUE
conf/icer/icer2017	ICER	2017	43507	10	Session 1: Novice Programmers	Comprehension First: Evaluating a Novel Pedagogy and Tutoring System for Program Tracing in CS1.	Greg L. Nelson; Benjamin Xie; Andrew J. Ko	https://doi.org/10.1145/3105726.3106178	TRUE
conf/icer/icer2017	ICER	2017	236-244	9	Session 10: Outside the Conventional Classroom	Computing Mentorship in a Software Boomtown: Relationships to Adolescent Interest and Beliefs.	Andrew J. Ko; Katie Davis	https://doi.org/10.1145/3105726.3106177	TRUE
conf/icer/icer2017	ICER	2017	136-144	9	Session 6: Teacher Conceptions and Experiences	Conceptions and Misconceptions about Computational Thinking among Italian Primary School Teachers.	Isabella Corradini; Michael Lodi; Enrico Nardelli	https://doi.org/10.1145/3105726.3106194	TRUE
conf/icer/icer2017	ICER	2017	110-117	8	Session 5: Social Interaction and Support	Describing Elementary Students' Interactions in K-5 Puzzle-based Computer Science Environments using the Collaborative Computing Observation Instrument (C-COI).	Maya Israel; Quentin M. Wherfel; Saadeddine Shehab; Oliver Melvin; Todd Lash	https://doi.org/10.1145/3105726.3106167	TRUE
conf/icer/icer2017	ICER	2017	226-235	10	Session 9: Validating Assessments & Dual Modality Teaching	Dual Modality Code Explanations for Novices: Unexpected Results.	Briana B. Morrison	https://doi.org/10.1145/3105726.3106191	TRUE
conf/icer/icer2017	ICER	2017	127-135	9	Session 5: Social Interaction and Support	Factors Influencing Students' Help-Seeking Behavior while Programming with Human and Computer Tutors.	Thomas W. Price; Zhongxiu Liu; Veronica Cateté; Tiffany Barnes	https://doi.org/10.1145/3105726.3106179	TRUE
conf/icer/icer2017	ICER	2017	145-154	10	Session 6: Teacher Conceptions and Experiences	Folk Pedagogy: Nobody Doesn't Like Active Learning.	Kate Sanders; Jonas Boustedt; Anna Eckerdal; Robert McCartney; Carol Zander	https://doi.org/10.1145/3105726.3106192	TRUE
conf/icer/icer2017	ICER	2017	254-262	9	Session 10: Outside the Conventional Classroom	Hack.edu: Examining How College Hackathons Are Perceived By Student Attendees and Non-Attendees.	Jeremy Warner; Philip J. Guo	https://doi.org/10.1145/3105726.3106174	TRUE
conf/icer/icer2017	ICER	2017	65-73	9	Session 3: When Things Go Wrong	Investigating Static Analysis Errors in Student Java Programs.	Stephen H. Edwards; Nischel Kandru; Mukund B. M. Rajagopal	https://doi.org/10.1145/3105726.3106182	TRUE
conf/icer/icer2017	ICER	2017	182-190	9	Session 7: External representations for understanding & Learning Trajectories	K-8 Learning Trajectories Derived from Research Literature: Sequence, Repetition, Conditionals.	Kathryn M. Rich; Carla Strickland; T. Andrew Binkowski; Cheryl Moran; Diana Franklin	https://doi.org/10.1145/3105726.3106166	TRUE
conf/icer/icer2017	ICER	2017	291-292	2	Doctoral Consortium	Active Learning Design Patterns for CS Education.	Nasrin Dehbozorgi	https://doi.org/10.1145/3105726.3105741	FALSE
conf/icer/icer2017	ICER	2017	74-82	9	Session 3: When Things Go Wrong	On Novices' Interaction with Compiler Error Messages: A Human Factors Approach.	James Prather; Raymond Pettit; Kayla Holcomb McMurry; Alani Peters; John Homer; Nevan Simone; Maxine Cohen	https://doi.org/10.1145/3105726.3106169	TRUE
conf/icer/icer2017	ICER	2017	209-216	8	Session 9: Validating Assessments & Dual Modality Teaching	Principled Assessment of Student Learning in High School Computer Science.	Eric Snow; Daisy Rutstein; Marie A. Bienkowski; Yuning Xu	https://doi.org/10.1145/3105726.3106186	TRUE
conf/icer/icer2017	ICER	2017	191-199	9	Session 8: Students' Use of Time in Programming	Quantifying Incremental Development Practices and Their Relationship to Procrastination.	Ayaan M. Kazerouni; Stephen H. Edwards; Clifford A. Shaffer	https://doi.org/10.1145/3105726.3106180	TRUE
conf/icer/icer2017	ICER	2017	93-100	8	Session 4: Tool-mediated Learning	RoboBUG: A Serious Game for Learning Debugging Techniques.	Michael A. Miljanovic; Jeremy S. Bradbury	https://doi.org/10.1145/3105726.3106173	TRUE
conf/icer/icer2017	ICER	2017	47-55	9	Session 2: Student Perceptions, Conceptions, Reactions	Social Perceptions in Computer Science and Implications for Diverse Students.	Jennifer Wang; Sepehr Hejazi Moghadam; Juliet Tiffany-Morales	https://doi.org/10.1145/3105726.3106175	TRUE
conf/icer/icer2017	ICER	2017	43819	9	Session 1: Novice Programmers	Sometimes, Rainfall Accumulates: Talk-Alouds with Novice Functional Programmers.	Kathi Fisler; Francisco Enrique Vicente Castro	https://doi.org/10.1145/3105726.3106183	TRUE
conf/icer/icer2017	ICER	2017	101-109	9	Session 4: Tool-mediated Learning	Students and Teachers Use An Online AP CS Principles EBook Differently: Teacher Behavior Consistent with Expert Learners.	Miranda C. Parker; Kantwon Rogers; Barbara J. Ericson; Mark Guzdial	https://doi.org/10.1145/3105726.3106189	TRUE
conf/icer/icer2017	ICER	2017	30-38	9	Session 2: Student Perceptions, Conceptions, Reactions	Students' Emotional Reactions to Programming Projects in Introduction to Programming: Measurement Approach and Influence on Learning Outcomes.	Alex Lishinski; Aman Yadav; Richard J. Enbody	https://doi.org/10.1145/3105726.3106187	TRUE
conf/icer/icer2017	ICER	2017	56-64	9	Session 3: When Things Go Wrong	Taking Advantage of Scale by Analyzing Frequent Constructed-Response, Code Tracing Wrong Answers.	Kristin Stephens-Martinez; An Ju; Krishna Parashar; Regina Ongowarsito; Nikunj Jain; Sreesha Venkat; Armando Fox	https://doi.org/10.1145/3105726.3106188	TRUE
conf/icer/icer2017	ICER	2017	39-46	8	Session 2: Student Perceptions, Conceptions, Reactions	The 'Art' of Programming: Exploring Student Conceptions of Programming through the Use of Drawing Methodology.	Adon Christian Michael Moskal; Joy Gasson; Dale Parsons	https://doi.org/10.1145/3105726.3106170	TRUE
conf/icer/icer2017	ICER	2017	173-181	9	Session 7: External representations for understanding & Learning Trajectories	The Affordances and Constraints of Diagrams on Students' Reasoning about State Machines.	Geoffrey L. Herman; Dong San Choi	https://doi.org/10.1145/3105726.3106172	TRUE
conf/icer/icer2017	ICER	2017	83-92	10	Session 4: Tool-mediated Learning	Theorem Provers as a Learning Tool in Theory of Computation.	Maria Knobelsdorf; Christiane Frede; Sebastian Böhne; Christoph Kreitz	https://doi.org/10.1145/3105726.3106184	TRUE
conf/icer/icer2017	ICER	2017	118-126	9	Session 5: Social Interaction and Support	Understanding Student Collaboration in Interdisciplinary Computing Activities.	Elise Deitrick; Michelle Hoda Wilkerson; Eric Simoneau	https://doi.org/10.1145/3105726.3106193	TRUE
conf/icer/icer2017	ICER	2017	155-163	9	Session 6: Teacher Conceptions and Experiences	Understanding the "Teacher Experience" in Primary and Secondary CS Professional Development.	Tracie Evans Reding; Brian Dorn	https://doi.org/10.1145/3105726.3106185	TRUE
conf/icer/icer2017	ICER	2017	21-29	9	Session 1: Novice Programmers	Using Learners' Self-Explanations of Subgoals to Guide Initial Problem Solving in App Inventor.	Lauren E. Margulieux; Richard Catrambone	https://doi.org/10.1145/3105726.3106168	TRUE
conf/icer/icer2017	ICER	2017	164-172	9	Session 7: External representations for understanding & Learning Trajectories	Using Tracing and Sketching to Solve Programming Problems: Replicating and Extending an Analysis of What Students Draw.	Kathryn Cunningham; Sarah Blanchard; Barbara Ericson; Mark Guzdial	https://doi.org/10.1145/3105726.3106190	TRUE
conf/icer/icer2017	ICER	2017	263-264	2	Doctoral Consortium	Codification Pedagogy for Introductory Courses.	Rita Garcia	https://doi.org/10.1145/3105726.3105727	FALSE
conf/icer/icer2017	ICER	2017	287-288	2	Doctoral Consortium	Comprehension-First Pedagogy and Adaptive, Intrinsically Motivated Tutorials.	Greg L. Nelson	https://doi.org/10.1145/3105726.3105739	FALSE
conf/icer/icer2017	ICER	2017	297-298	2	Doctoral Consortium	Determining if Spatial Reasoning is Required to Learn CS.	Amber Solomon	https://doi.org/10.1145/3105726.3105744	FALSE
conf/icer/icer2017	ICER	2017	265-266	2	Doctoral Consortium	Developing Teachers as Computational Participants.	Daniel Hickmott	https://doi.org/10.1145/3105726.3105728	FALSE
conf/icer/icer2017	ICER	2017	289-290	2	Doctoral Consortium	Explicitly Teaching Metacognitive and Self-Regulation Skills in Computing.	Dastyni Loksa	https://doi.org/10.1145/3105726.3105740	FALSE
conf/icer/icer2017	ICER	2017	281-282	2	Doctoral Consortium	Growth Mindset in Computational Thinking Teaching and Teacher Training.	Michael Lodi	https://doi.org/10.1145/3105726.3105736	FALSE
conf/icer/icer2017	ICER	2017	279-280	2	Doctoral Consortium	Hands-on in Computer Programming Education.	Kristina Von Hausswolff	https://doi.org/10.1145/3105726.3105735	FALSE
conf/icer/icer2017	ICER	2017	295-296	2	Doctoral Consortium	Hybrid Environments: A Bridge from Blocks to Text.	Jeremiah Blanchard	https://doi.org/10.1145/3105726.3105743	FALSE
conf/icer/icer2017	ICER	2017	293-294	2	Doctoral Consortium	Improving the Learning Experiences of First-Year Computer Science Students with Empathetic IDEs.	Carla De Lira	https://doi.org/10.1145/3105726.3105742	FALSE
conf/icer/icer2017	ICER	2017	1	1	Keynote & Invited Talks	Minding One's Business: On the How, When, and Where of Cognition.	Wolff-Michael Roth	https://doi.org/10.1145/3105726.3105747	FALSE
conf/icer/icer2017	ICER	2017	269-270	2	Doctoral Consortium	Physical Computing as an Inquiry Working Technique.	Sandra Schulz	https://doi.org/10.1145/3105726.3105730	FALSE
conf/icer/icer2017	ICER	2017	273-274	2	Doctoral Consortium	Student Modeling Based on Fine-Grained Programming Process Snapshots.	Juho Leinonen	https://doi.org/10.1145/3105726.3105732	FALSE
conf/icer/icer2017	ICER	2017	283-284	2	Doctoral Consortium	Studying Professional Identity in Software Engineering.	Rick Parker	https://doi.org/10.1145/3105726.3105737	FALSE
conf/icer/icer2017	ICER	2017	301-302	2	Doctoral Consortium	The Effect of Sketching and Tracing on Instructors' Understanding of Student Misconceptions.	Kathryn Cunningham	https://doi.org/10.1145/3105726.3105746	FALSE
conf/icer/icer2017	ICER	2017	299-300	2	Doctoral Consortium	Tools to Support Data-driven Reflective Learning.	Stephen MacNeil	https://doi.org/10.1145/3105726.3105745	FALSE
conf/icer/icer2017	ICER	2017	271-272	2	Doctoral Consortium	Towards a Fine-grained Analysis of Complexity of Programming Tasks.	Rodrigo Duran	https://doi.org/10.1145/3105726.3105731	FALSE
conf/icer/icer2017	ICER	2017	285-286	2	Doctoral Consortium	Towards Understanding Student's Mental Effort in Block- Based Programming Environments Using Electroencephalogram (EEG).	Yerika Jimenez	https://doi.org/10.1145/3105726.3105738	FALSE
conf/icer/icer2017	ICER	2017	267-268	2	Doctoral Consortium	Understanding and Supporting Better Pairings for CS1 Students.	Laura Hobbes LeGault	https://doi.org/10.1145/3105726.3105729	FALSE
conf/icer/icer2017	ICER	2017	275-276	2	Doctoral Consortium	Using Discernment Activities to Promote Skill Retention from Programming and Software Tutorials.	Hilarie Nickerson	https://doi.org/10.1145/3105726.3105733	FALSE
conf/icer/icer2017	ICER	2017	277-278	2	Doctoral Consortium	Using Mediational Means during Learning and Understanding of Proof Assignments from Theory of Computation.	Christiane Frede	https://doi.org/10.1145/3105726.3105734	FALSE
conf/icer/icer2018	ICER	2018	223-231	9	Session 9: Recruitment and CS Careers	"I told you this last time, right?": Re-visiting narratives of STEM education.	Sebastian Dziallas; Sally Fincher	https://doi.org/10.1145/3230977.3230989	TRUE
conf/icer/icer2018	ICER	2018	250-257	8	Session 10: Case Studies of Assessment and Studying	Applying a Gesture Taxonomy to Introductory Computing Concepts.	Amber Solomon; Mark Guzdial; Betsy DiSalvo; Ben Rydal Shapiro	https://doi.org/10.1145/3230977.3231001	TRUE
conf/icer/icer2018	ICER	2018	178-186	9	Session 8: Tools and Technologies in Computing Education, 2	Automated Plagiarism Detection for Computer Programming Exercises Based on Patterns of Resubmission.	Narjes Tahaei; David C. Noelle	https://doi.org/10.1145/3230977.3231006	TRUE
conf/icer/icer2018	ICER	2018	196-204	9	Session 8: Tools and Technologies in Computing Education, 2	Blackbox, Five Years On: An Evaluation of a Large-scale Programming Data Collection Project.	Neil C. C. Brown; Amjad AlTadmri; Sue Sentance; Michael Kölling	https://doi.org/10.1145/3230977.3230991	TRUE
conf/icer/icer2018	ICER	2018	124-132	9	Session 6: K12 Computing Education	Decomposition: A K-8 Computational Thinking Learning Trajectory.	Kathryn M. Rich; T. Andrew Binkowski; Carla Strickland; Diana Franklin	https://doi.org/10.1145/3230977.3230979	TRUE
conf/icer/icer2018	ICER	2018	78-85	8	Session 4: CS Teachers	Digital Competence, Teacher Self-Efficacy and Training Needs.	Linda Mannila; Lars-Åke Norden; Arnold Pears	https://doi.org/10.1145/3230977.3230993	TRUE
conf/icer/icer2018	ICER	2018	266-267	2	Doctoral Consortium	A Misconception Driven Student Model to Author Feedback.	Luke Gusukuma	https://doi.org/10.1145/3230977.3231015	FALSE
conf/icer/icer2018	ICER	2018	60-68	9	Session 3: Tools and Technologies in Computing Education, 1	Evaluating the Efficiency and Effectiveness of Adaptive Parsons Problems.	Barbara J. Ericson; James D. Foley; Jochen Rick	https://doi.org/10.1145/3230977.3231000	TRUE
conf/icer/icer2018	ICER	2018	115-123	9	Session 5: Background factors	Experiences of Computer Science Transfer Students.	Harrison Kwik; Benjamin Xie; Andrew J. Ko	https://doi.org/10.1145/3230977.3231004	TRUE
conf/icer/icer2018	ICER	2018	241-249	9	Session 10: Case Studies of Assessment and Studying	Exploring how Students Perform in a Theory of Computation Course using Final Exam and Homework Assignments Data.	Christiane Frede; Maria Knobelsdorf	https://doi.org/10.1145/3230977.3230996	TRUE
conf/icer/icer2018	ICER	2018	43789	10	Session 1: Social and Psychological Theory Perspectives	Fixed versus Growth Mindset Does not Seem to Matter Much: A Prospective Observational Study in Two Late Bachelor level Computer Science Courses.	Antti-Juhani Kaijanaho; Ville Tirronen	https://doi.org/10.1145/3230977.3230982	TRUE
conf/icer/icer2018	ICER	2018	264-265	2	Doctoral Consortium	A Study on the Assessment of Introductory Computational Thinking via Scratch Programming in Primary Schools.	Janne Fagerlund	https://doi.org/10.1145/3230977.3231013	FALSE
conf/icer/icer2018	ICER	2018	215-222	8	Session 9: Recruitment and CS Careers	How Mother and Father Support Affect Youths' Interest in Computer Science.	Jody Clarke-Midura; Frederick J. Poole; Katarina Pantic; Chongning Sun; Vicki Allan	https://doi.org/10.1145/3230977.3231003	TRUE
conf/icer/icer2018	ICER	2018	169-177	9	Session 7: Misconceptions	Identifying Student Difficulties with Basic Data Structures.	Daniel Zingaro; Cynthia Taylor; Leo Porter; Michael Clancy; Cynthia Bailey Lee; Soohyun Nam Liao; Kevin C. Webb	https://doi.org/10.1145/3230977.3231005	TRUE
conf/icer/icer2018	ICER	2018	106-114	9	Session 5: Background factors	Investigating the Relationship Between Spatial Skills and Computer Science.	Jack Parkinson; Quintin I. Cutts	https://doi.org/10.1145/3230977.3230990	TRUE
conf/icer/icer2018	ICER	2018	41-50	10	Session 3: Tools and Technologies in Computing Education, 1	Metacognitive Difficulties Faced by Novice Programmers in Automated Assessment Tools.	James Prather; Raymond Pettit; Kayla Holcomb McMurry; Alani Peters; John Homer; Maxine Cohen	https://doi.org/10.1145/3230977.3230981	TRUE
conf/icer/icer2018	ICER	2018	160-168	9	Session 7: Misconceptions	Misconception-Driven Feedback: Results from an Experimental Study.	Luke Gusukuma; Austin Cory Bart; Dennis G. Kafura; Jeremy Ernst	https://doi.org/10.1145/3230977.3231002	TRUE
conf/icer/icer2018	ICER	2018	187-195	9	Session 8: Tools and Technologies in Computing Education, 2	Objects Count so Count Objects!	Ewan D. Tempero; Paul Denny; Andrew Luxton-Reilly; Paul Ralph	https://doi.org/10.1145/3230977.3230985	TRUE
conf/icer/icer2018	ICER	2018	31-39	9	Session 2: Theory in CS Education	On Use of Theory in Computing Education Research.	Greg L. Nelson; Andrew J. Ko	https://doi.org/10.1145/3230977.3230992	TRUE
conf/icer/icer2018	ICER	2018	69-77	9	Session 4: CS Teachers	Pedagogical Content Knowledge for Teaching Inclusive Design.	Alannah Oleson; Christopher J. Mendez; Zoe Steine-Hanson; Claudia Hilderbrand; Christopher Perdriau; Margaret M. Burnett; Andrew J. Ko	https://doi.org/10.1145/3230977.3230998	TRUE
conf/icer/icer2018	ICER	2018	86-94	9	Session 4: CS Teachers	Professional Learning in the Midst of Teaching Computer Science.	Aleata Hubbard; Katie D'Silva	https://doi.org/10.1145/3230977.3230983	TRUE
conf/icer/icer2018	ICER	2018	151-159	9	Session 7: Misconceptions	Programming Misconceptions for School Students.	Alaaeddin Swidan; Felienne Hermans; Marileen Smit	https://doi.org/10.1145/3230977.3230995	TRUE
conf/icer/icer2018	ICER	2018	43475	10	Session 1: Social and Psychological Theory Perspectives	Self-Efficacy, Cognitive Load, and Emotional Reactions in Collaborative Algorithms Labs - A Case Study.	Laura Toma; Jan Vahrenhold	https://doi.org/10.1145/3230977.3230980	TRUE
conf/icer/icer2018	ICER	2018	97-105	9	Session 5: Background factors	Socioeconomic Status and Computer Science Achievement: Spatial Ability as a Mediating Variable in a Novel Model of Understanding.	Miranda C. Parker; Amber Solomon; Brianna Pritchett; David A. Illingworth; Lauren E. Margulieux; Mark Guzdial	https://doi.org/10.1145/3230977.3230987	TRUE
conf/icer/icer2018	ICER	2018	142-150	9	Session 6: K12 Computing Education	Starting from Scratch: Outcomes of Early Computer Science Learning Experiences and Implications for What Comes Next.	David Weintrop; Alexandria K. Hansen; Danielle B. Harlow; Diana Franklin	https://doi.org/10.1145/3230977.3230988	TRUE
conf/icer/icer2018	ICER	2018	232-240	9	Session 10: Case Studies of Assessment and Studying	TA Marking Parties: Worth the Price of Pizza?	Brian Harrington; Marzieh Ahmadzadeh; Nick Cheng; Eric Heqi Wang; Vladimir Efimov	https://doi.org/10.1145/3230977.3230997	TRUE
conf/icer/icer2018	ICER	2018	21-30	10	Session 1: Social and Psychological Theory Perspectives	Towards an Analysis of Program Complexity From a Cognitive Perspective.	Rodrigo Duran; Juha Sorva; Sofia Leite	https://doi.org/10.1145/3230977.3230986	TRUE
conf/icer/icer2018	ICER	2018	133-141	9	Session 6: K12 Computing Education	Unravelling the Cognition of Coding in 3-to-6-year Olds: The development of an assessment tool and the relation between coding ability and cognitive compiling of syntax in natural language.	Eva Marinus; Zoe Powell; Rosalind Thornton; Genevieve McArthur; Stephen Crain	https://doi.org/10.1145/3230977.3230984	TRUE
conf/icer/icer2018	ICER	2018	205-214	10	Session 9: Recruitment and CS Careers	Using Social Cognitive Career Theory to Understand Why Students Choose to Study Computer Science.	Amnah Alshahrani; Isla Ross; Murray I. Wood	https://doi.org/10.1145/3230977.3230994	TRUE
conf/icer/icer2018	ICER	2018	51-59	9	Session 3: Tools and Technologies in Computing Education, 1	Who Tests the Testers?	John Wrenn; Shriram Krishnamurthi; Kathi Fisler	https://doi.org/10.1145/3230977.3230999	TRUE
conf/icer/icer2018	ICER	2018	270-271	2	Doctoral Consortium	Data Mining and Machine Learning in Education with Focus in Undergraduate CS Student Success.	William Gregory Johnson	https://doi.org/10.1145/3230977.3231012	FALSE
conf/icer/icer2018	ICER	2018	284-285	2	Doctoral Consortium	Developing Students' Cognitive Processes Required for Software Design Verification.	Prajish Prasad	https://doi.org/10.1145/3230977.3231011	FALSE
conf/icer/icer2018	ICER	2018	278-279	2	Doctoral Consortium	Developing Students' Conceptual Design Skills for Software Engineering.	T. G. Lakshmi	https://doi.org/10.1145/3230977.3231008	FALSE
conf/icer/icer2018	ICER	2018	290-291	2	Doctoral Consortium	Easing Learners into Data Science via Visualization of Concepts and Computations.	Lovisa Sundin	https://doi.org/10.1145/3230977.3231026	FALSE
conf/icer/icer2018	ICER	2018	258-259	2	Doctoral Consortium	Emotions Experienced by First-Year Engineering Students During Programming Tasks.	Zahra Atiq	https://doi.org/10.1145/3230977.3231014	FALSE
conf/icer/icer2018	ICER	2018	294-295	2	Doctoral Consortium	Exploring Data-driven Worked Examples for Block-based Programming.	Rui Zhi	https://doi.org/10.1145/3230977.3231018	FALSE
conf/icer/icer2018	ICER	2018	276-277	2	Doctoral Consortium	Fostering Computational Thinking through Problem-Solving at School.	Amelie Labusch	https://doi.org/10.1145/3230977.3231019	FALSE
conf/icer/icer2018	ICER	2018	95-96	2	Keynote & Invited Talk	Growing Minds - 21st Century Competences and Digitalisation among Finnish Youth?	Kirsti Lonka	https://doi.org/10.1145/3230977.3230978	FALSE
conf/icer/icer2018	ICER	2018	288-289	2	Doctoral Consortium	Massive Open Online Courses in Programming: the Case of Estonia.	Merilin Säde	https://doi.org/10.1145/3230977.3231017	FALSE
conf/icer/icer2018	ICER	2018	268-269	2	Doctoral Consortium	Practical Thinking while Programming: A Deweyan Approach to Knowledge in Computer Science.	Kristina Von Hausswolff	https://doi.org/10.1145/3230977.3231025	FALSE
conf/icer/icer2018	ICER	2018	280-281	2	Doctoral Consortium	Progression of Student Reasoning about Concurrency.	Aubrey Lawson	https://doi.org/10.1145/3230977.3231024	FALSE
conf/icer/icer2018	ICER	2018	282-283	2	Doctoral Consortium	The <1%: Black Women Obtaining PhDs in Computing.	Amari Lewis	https://doi.org/10.1145/3230977.3231016	FALSE
conf/icer/icer2018	ICER	2018	274-275	2	Doctoral Consortium	The Collegiate Hackathon Experience.	Brittany Ann Kos	https://doi.org/10.1145/3230977.3231022	FALSE
conf/icer/icer2018	ICER	2018	260-261	2	Doctoral Consortium	Towards a Theory of HtDP-based Program-Design Learning.	Francisco Enrique Vicente G. Castro	https://doi.org/10.1145/3230977.3231020	FALSE
conf/icer/icer2018	ICER	2018	262-263	2	Doctoral Consortium	Towards an Instructional Design of Complex Learning in Introductory Programming Courses.	Rodrigo Duran	https://doi.org/10.1145/3230977.3231007	FALSE
conf/icer/icer2018	ICER	2018	286-287	2	Doctoral Consortium	Using Computational Thinking to Transform Elementary Mathematics Instruction.	Kathryn M. Rich	https://doi.org/10.1145/3230977.3231010	FALSE
conf/icer/icer2018	ICER	2018	292-293	2	Doctoral Consortium	Using Program Analysis to Improve API Learnability.	Kyle Thayer	https://doi.org/10.1145/3230977.3231009	FALSE
conf/icer/icer2018	ICER	2018	272-273	2	Doctoral Consortium	What are they thinking?	Cazembe Kennedy	https://doi.org/10.1145/3230977.3231023	FALSE
conf/iticse/iticse2014	ITICSE	2014	1	1	Keynote addresses	New technology, new learning?	Yvonne Rogers	https://doi.org/10.1145/2591708.2602688	FALSE
conf/iticse/iticse2014	ITICSE	2014	2	1	Keynote addresses	Meeting the future challenges of education and digitization.	Jan Gulliksen	https://doi.org/10.1145/2591708.2602689	FALSE
conf/iticse/iticse2014	ITICSE	2014	43532	6	New technology & learning	SPOC-supported introduction to programming.	Marco Piccioni; H.-Christian Estler; Bertrand Meyer	https://doi.org/10.1145/2591708.2591759	TRUE
conf/iticse/iticse2014	ITICSE	2014	43722	6	New technology & learning	Teaching and learning with MOOCs: computing academics' perspectives and engagement.	Anna Eckerdal; PÃ¤ivi Kinnunen; Neena Thota; Aletta NylÃ©n; Judy Sheard; Lauri Malmi	https://doi.org/10.1145/2591708.2591740	TRUE
conf/iticse/iticse2014	ITICSE	2014	15-20	6	New technology & learning	Augmenting PBL with large public presentations: a case study in interactive graphics pedagogy.	Mario Romero; BjÃ¶rn Thuresson; Christopher E. Peters; Filip Kis; Joe Coppard; Jonas AndrÃ©e; Natalia Landazuri	https://doi.org/10.1145/2591708.2591727	TRUE
conf/iticse/iticse2014	ITICSE	2014	21-26	6	Visualisation	The state of play: a notional machine for learning programming.	Michael Berry; Michael KÃ¶lling	https://doi.org/10.1145/2591708.2591721	TRUE
conf/iticse/iticse2014	ITICSE	2014	27-32	6	Visualisation	System for automatic generation of algorithm visualizations based on pseudocode interpretation.	Jure Mornar; Andrina Granic; Sasa Mladenovic	https://doi.org/10.1145/2591708.2591743	TRUE
conf/iticse/iticse2014	ITICSE	2014	33-38	6	Visualisation	Selective hiding for improved algorithmic visualization.	ZoltÃ¡n KÃ¡tai	https://doi.org/10.1145/2591708.2591734	TRUE
conf/iticse/iticse2014	ITICSE	2014	39-44	6	Programming	Failure rates in introductory programming revisited.	Christopher Watson; Frederick W. B. Li	https://doi.org/10.1145/2591708.2591749	TRUE
conf/iticse/iticse2014	ITICSE	2014	45-50	6	Programming	Effect of a 2-week scratch intervention in CS1 on learners with varying prior knowledge.	Shitanshu Mishra; Sudeesh Balan; Sridhar Iyer; Sahana Murthy	https://doi.org/10.1145/2591708.2591733	TRUE
conf/iticse/iticse2014	ITICSE	2014	51-56	6	Programming	Think-pair-share in a large CS1 class: does learning really happen?	Aditi Kothiyal; Sahana Murthy; Sridhar Iyer	https://doi.org/10.1145/2591708.2591739	TRUE
conf/iticse/iticse2014	ITICSE	2014	57-62	6	K12 -- high school CS	Assessing computational learning in K-12.	Shuchi Grover; Stephen Cooper; Roy Pea	https://doi.org/10.1145/2591708.2591713	TRUE
conf/iticse/iticse2014	ITICSE	2014	63-68	6	K12 -- high school CS	Engaging high school students using chatbots.	Luciana Benotti; MarÃ­a Cecilia MartÃ­nez; Fernando Schapachnik	https://doi.org/10.1145/2591708.2591728	TRUE
conf/iticse/iticse2014	ITICSE	2014	69-74	6	K12 -- high school CS	Serious toys: three years of teaching computer science concepts in K-12 classrooms.	Yvon Feaster; Farha Ali; Jiannan Zhai; Jason O. Hallstrom	https://doi.org/10.1145/2591708.2591732	TRUE
conf/iticse/iticse2014	ITICSE	2014	75-80	6	Algorithms	The magic of algorithm design and analysis: teaching algorithmic skills using magic card tricks.	JoÃ£o F. Ferreira; Alexandra Mendes	https://doi.org/10.1145/2591708.2591745	TRUE
conf/iticse/iticse2014	ITICSE	2014	81-86	6	Algorithms	A method to prove query lower bounds.	Jagadish M.; Sridhar Iyer	https://doi.org/10.1145/2591708.2591736	TRUE
conf/iticse/iticse2014	ITICSE	2014	87-92	6	Algorithms	Problem-solving using the extremality principle.	Jagadish M.; Sridhar Iyer	https://doi.org/10.1145/2591708.2591718	TRUE
conf/iticse/iticse2014	ITICSE	2014	93-98	6	Security & integrity	MLSvisual: a visualization tool for teaching access control using multi-level security.	Man Wang; Steve Carr; Jean Mayo; Ching-Kuang Shene; Chaoli Wang	https://doi.org/10.1145/2591708.2591730	TRUE
conf/iticse/iticse2014	ITICSE	2014	99-104	6	Security & integrity	Empowering faculty to embed security topics into computer science courses.	Ambareen Siraj; Sheikh Ghafoor; Joshua Tower; Ada Haynes	https://doi.org/10.1145/2591708.2591741	TRUE
conf/iticse/iticse2014	ITICSE	2014	105-110	6	Security & integrity	Student perceptions of the acceptability of various code-writing practices.	Simon; Beth Cook; Judy Sheard; Angela Carbone; Chris W. Johnson	https://doi.org/10.1145/2591708.2591755	TRUE
conf/iticse/iticse2014	ITICSE	2014	111-116	6	Gender & diversity	A historical examination of the social factors affecting female participation in computing.	Elizabeth Patitsas; Michelle Craig; Steve M. Easterbrook	https://doi.org/10.1145/2591708.2591731	TRUE
conf/iticse/iticse2014	ITICSE	2014	117-122	6	Gender & diversity	Cultural appropriation of computational thinking acquisition research: seeding fields of diversity.	Clarisse Sieckenius de Souza; Luciana Cardoso de Castro Salgado; Carla Faria LeitÃ£o; Martha M. Serra	https://doi.org/10.1145/2591708.2591729	TRUE
conf/iticse/iticse2014	ITICSE	2014	123-128	6	Gender & diversity	Apps for social justice: motivating computer science learning with design and real-world problem solving.	Sarah Van Wart; Sepehr Vakil; Tapan S. Parikh	https://doi.org/10.1145/2591708.2591751	TRUE
conf/iticse/iticse2014	ITICSE	2014	129-134	6	Software engineering	Things coming together: learning experiences in a software studio.	Julia Prior; Andrea Connor; John Leaney	https://doi.org/10.1145/2591708.2591720	TRUE
conf/iticse/iticse2014	ITICSE	2014	135-140	6	Software engineering	Understanding students' preferences of software engineering projects.	ThÃ©rÃ¨se Smith; Swapna S. Gokhale; Robert McCartney	https://doi.org/10.1145/2591708.2591753	TRUE
conf/iticse/iticse2014	ITICSE	2014	141-146	6	Mobile development	Mobile application development classes for the mobile era.	Kelvin Sung; Arjmand Samuel	https://doi.org/10.1145/2591708.2591710	TRUE
conf/iticse/iticse2014	ITICSE	2014	147-152	6	Mobile development	A teaching model for development of sensor-driven mobile applications.	Hui Chen; Kostadin Damevski	https://doi.org/10.1145/2591708.2591719	TRUE
conf/iticse/iticse2014	ITICSE	2014	153-158	6	K12 -- high school CS 2	Students' performance on programming-related tasks in an informatics contest in Finland, Sweden and Lithuania.	Valentina Dagiene; Linda Mannila; Timo Poranen; Lennart Rolandsson; PÃ¤r SÃ¶derhjelm	https://doi.org/10.1145/2591708.2591760	TRUE
conf/iticse/iticse2014	ITICSE	2014	159-164	6	K12 -- high school CS 2	Understanding differences among coding club students.	Antti-Jussi Lakanen; Ville IsomÃ¶ttÃ¶nen; Vesa Lappalainen	https://doi.org/10.1145/2591708.2591716	TRUE
conf/iticse/iticse2014	ITICSE	2014	165-170	6	Software testing	Responses to adaptive feedback for software testing.	Kevin Buffardi; Stephen H. Edwards	https://doi.org/10.1145/2591708.2591756	TRUE
conf/iticse/iticse2014	ITICSE	2014	171-176	6	Software testing	Do student programmers all tend to write the same software tests?	Stephen H. Edwards; Zalia Shams	https://doi.org/10.1145/2591708.2591757	TRUE
conf/iticse/iticse2014	ITICSE	2014	177-182	6	Software testing	QR code programming tasks with automated assessment.	Lasse Hakulinen; Lauri Malmi	https://doi.org/10.1145/2591708.2591761	TRUE
conf/iticse/iticse2014	ITICSE	2014	183-188	6	Collaboration	Intercultural computer science education.	ZoltÃ¡n KÃ¡tai	https://doi.org/10.1145/2591708.2591744	TRUE
conf/iticse/iticse2014	ITICSE	2014	189-194	6	Collaboration	Course development through student-faculty collaboration: a case study.	Dilan Ustek; Erik Opavsky; Henry M. Walker; David Cowden	https://doi.org/10.1145/2591708.2591723	TRUE
conf/iticse/iticse2014	ITICSE	2014	195-200	6	Collaboration	Making group processes explicit to student: a case of justice.	Ville IsomÃ¶ttÃ¶nen	https://doi.org/10.1145/2591708.2591717	TRUE
conf/iticse/iticse2014	ITICSE	2014	201-206	6	Digital fluency	A methodological approach to key competencies in informatics.	Christina DÃ¶rge	https://doi.org/10.1145/2591708.2591742	TRUE
conf/iticse/iticse2014	ITICSE	2014	207-212	6	Digital fluency	Weaving computing into all middle school disciplines.	Susan H. Rodger; Dwayne Brown; Michael Hoyle; Daniel MacDonald; Michael Marion; Elizabeth Onstwedder; Bella Onwumbiko; Edwin Ward	https://doi.org/10.1145/2591708.2591754	TRUE
conf/iticse/iticse2014	ITICSE	2014	213-218	6	Digital fluency	Early validation of computational thinking pattern analysis.	Kyu Han Koh; Hilarie Nickerson; Ashok R. Basawapatna; Alexander Repenning	https://doi.org/10.1145/2591708.2591724	TRUE
conf/iticse/iticse2014	ITICSE	2014	219-224	6	Gamification	Guess my object: an 'objects first' game on objects' behavior and implementation with bluej.	Axel Schmolitzky; Timo GÃ¶ttel	https://doi.org/10.1145/2591708.2591725	TRUE
conf/iticse/iticse2014	ITICSE	2014	225-230	6	Gamification	Game programming for improving learning experience.	Raquel B. HijÃ³n-Neira; J. Ãngel VelÃ¡zquez-Iturbide; Celeste Pizarro-Romero; LuÃ­s CarriÃ§o	https://doi.org/10.1145/2591708.2591737	TRUE
conf/iticse/iticse2014	ITICSE	2014	231-236	6	Gamification	Assessment process for a simulation-based training environment in global software development.	Miguel J. Monasor; Aurora VizcaÃ­no; Mario Piattini; John Noll; Sarah Beecham	https://doi.org/10.1145/2591708.2591747	TRUE
conf/iticse/iticse2014	ITICSE	2014	237-242	6	Curriculum concepts	Towards identification and classification of core and threshold concepts in methodology education in computing.	Matti Tedre; Danny Brash; Sirkku MÃ¤nnikkÃ¶-Barbutiu; Johannes C. CronjÃ©	https://doi.org/10.1145/2591708.2591758	TRUE
conf/iticse/iticse2014	ITICSE	2014	243-248	6	Curriculum concepts	Leveraging open source principles for flexible concept inventory development.	Leo Porter; Cynthia Taylor; Kevin C. Webb	https://doi.org/10.1145/2591708.2591722	TRUE
conf/iticse/iticse2014	ITICSE	2014	249-254	6	Curriculum concepts	Advanced data analytics education for students and companies.	Maija Marttila-Kontio; Mikko Kontio; Virpi Hotti	https://doi.org/10.1145/2591708.2591746	TRUE
conf/iticse/iticse2014	ITICSE	2014	255-260	6	Peer instruction	Peer instruction: a link to the exam.	Daniel Zingaro; Leo Porter	https://doi.org/10.1145/2591708.2591711	TRUE
conf/iticse/iticse2014	ITICSE	2014	261-266	6	Peer instruction	Comparing outcomes in inverted and traditional CS1.	Diane Horton; Michelle Craig; Jennifer Campbell; Paul Gries; Daniel Zingaro	https://doi.org/10.1145/2591708.2591752	TRUE
conf/iticse/iticse2014	ITICSE	2014	267-272	6	Peer instruction	CaptainTeach: multi-stage, in-flow peer review for programming assignments.	Joe Gibbs Politz; Daniel Patterson; Shriram Krishnamurthi; Kathi Fisler	https://doi.org/10.1145/2591708.2591738	TRUE
conf/iticse/iticse2014	ITICSE	2014	273-278	6	CS ed research	Enhancing syntax error messages appears ineffectual.	Paul Denny; Andrew Luxton-Reilly; Dave Carpenter	https://doi.org/10.1145/2591708.2591748	TRUE
conf/iticse/iticse2014	ITICSE	2014	279-284	6	CS ed research	A qualitative think-aloud study of novice programmers' code writing strategies.	Jacqueline L. Whalley; Nadia Kasto	https://doi.org/10.1145/2591708.2591762	TRUE
conf/iticse/iticse2014	ITICSE	2014	285-290	6	CS ed research	Programming: reading, writing and reversing.	Donna Teague; Raymond Lister	https://doi.org/10.1145/2591708.2591712	TRUE
conf/iticse/iticse2014	ITICSE	2014	291-296	6	Motivating learning	Identifying computer science self-regulated learning strategies.	Katrina Falkner; Rebecca Vivian; Nickolas J. G. Falkner	https://doi.org/10.1145/2591708.2591715	TRUE
conf/iticse/iticse2014	ITICSE	2014	297-302	6	Motivating learning	Motivational active learning: engaging university students in computer science education.	Johanna Pirker; Maria Riffnaller-Schiefer; Christian GÃ¼tl	https://doi.org/10.1145/2591708.2591750	TRUE
conf/iticse/iticse2014	ITICSE	2014	303-308	6	Motivating learning	Study on difficulties and misconceptions with modern type systems.	Ville Tirronen	https://doi.org/10.1145/2591708.2591726	TRUE
conf/iticse/iticse2014	ITICSE	2014	309-314	6	Robotics	Interdisciplinary connections in a mobile computing and robotics course.	Stan Kurkovsky	https://doi.org/10.1145/2591708.2591735	TRUE
conf/iticse/iticse2014	ITICSE	2014	315-320	6	Robotics	Teaching a core CS concept through robotics.	StÃ©phane Magnenat; Jiwon Shin; Fanny Riedo; Roland Siegwart; Mordechai Ben-Ari	https://doi.org/10.1145/2591708.2591714	TRUE
conf/iticse/iticse2014	ITICSE	2014	321-322	2	Panel	Three views on motivation and programming.	Amber Settle; Arto Vihavainen; Juha Sorva	https://doi.org/10.1145/2591708.2591709	FALSE
conf/iticse/iticse2014	ITICSE	2014	323	1	Invited panel	ITiCSE: the next decade.	Arnold Pears; Alison Clear; Lillian N. Cassel; Ernesto Cuadros-Vargas; Valentina Dagiene; Cary Laxer	https://doi.org/10.1145/2591708.2617812	FALSE
conf/iticse/iticse2014	ITICSE	2014	324	1	Tips, techniques and courseware	Making the hardware-software connection with PLP.	Sohum Sohoni	https://doi.org/10.1145/2591708.2602678	FALSE
conf/iticse/iticse2014	ITICSE	2014	325	1	Tips, techniques and courseware	Supporting communication within industrial doctoral projects: the thesis steering model.	Ilona Heldal; Eva SÃ¶derstrÃ¶m; Lars BrÃ¥the; Robert Murby	https://doi.org/10.1145/2591708.2602680	FALSE
conf/iticse/iticse2014	ITICSE	2014	326	1	Tips, techniques and courseware	Structuring software engineering learning within open source software participation.	Heidi J. C. Ellis; Gregory W. Hislop	https://doi.org/10.1145/2591708.2602681	FALSE
conf/iticse/iticse2014	ITICSE	2014	327	1	Tips, techniques and courseware	AsseSQL: an online, browser-based SQL skills assessment tool.	Julia R. Prior	https://doi.org/10.1145/2591708.2602682	FALSE
conf/iticse/iticse2014	ITICSE	2014	328	1	Tips, techniques and courseware	Automatic evaluation of students' programs.	Tonci Dadic; Vlado Glavinic; Marko Rosic	https://doi.org/10.1145/2591708.2602683	FALSE
conf/iticse/iticse2014	ITICSE	2014	329	1	Tips, techniques and courseware	ALGO-RYTHMICS: science and art without ethnic borders.	ZoltÃ¡n KÃ¡tai	https://doi.org/10.1145/2591708.2602684	FALSE
conf/iticse/iticse2014	ITICSE	2014	330	1	Tips, techniques and courseware	A social platform supporting learning through video creation by students.	Jaime Urquiza-Fuentes; Jorge Castellanos; Isidoro HernÃ¡n; EstefanÃ­a MartÃ­n; Pablo A. Haya	https://doi.org/10.1145/2591708.2602685	FALSE
conf/iticse/iticse2014	ITICSE	2014	331	1	Tips, techniques and courseware	Team based learning in theoretical computer science.	Nathaly Verwaal	https://doi.org/10.1145/2591708.2602686	FALSE
conf/iticse/iticse2014	ITICSE	2014	332	1	Tips, techniques and courseware	CaptainTeach: a platform for in-flow peer review of programming assignments.	Joe Gibbs Politz; Shriram Krishnamurthi; Kathi Fisler	https://doi.org/10.1145/2591708.2602687	FALSE
conf/iticse/iticse2014	ITICSE	2014	333	1	Poster session I	Learning computer programming: a study of the effectiveness of a COAC#.	Jakeline Marcos-Abed	https://doi.org/10.1145/2591708.2602652	FALSE
conf/iticse/iticse2014	ITICSE	2014	334	1	Poster session I	AlgoTouch: a programming by demonstration tool for teaching algorithms.	Patrice Frison	https://doi.org/10.1145/2591708.2602654	FALSE
conf/iticse/iticse2014	ITICSE	2014	335	1	Poster session I	Evolving synchronous online graduate CS education.	J. Mark Pullen; Priscilla M. McAndrews	https://doi.org/10.1145/2591708.2602656	FALSE
conf/iticse/iticse2014	ITICSE	2014	336	1	Poster session I	Automated assessment of UML activity diagrams.	Michael Striewe; Michael Goedicke	https://doi.org/10.1145/2591708.2602657	FALSE
conf/iticse/iticse2014	ITICSE	2014	337	1	Poster session I	Learning within a professional environment: shared ownership of an HFOSS project.	Heidi J. C. Ellis; Stoney Jackson; Darci Burdge; Lori Postner; Gregory W. Hislop; Joanmarie Diggs	https://doi.org/10.1145/2591708.2602660	FALSE
conf/iticse/iticse2014	ITICSE	2014	338	1	Poster session I	SHAvisual: a secure hash algorithm visualization tool.	Jun Ma; Jun Tao; Melissa S. Keranen; Jean Mayo; Ching-Kuang Shene; Chaoli Wang	https://doi.org/10.1145/2591708.2602663	FALSE
conf/iticse/iticse2014	ITICSE	2014	339	1	Poster session I	Learning outcomes using objectives with computer science students.	JosÃ©-Amelio Medina; Juan Jose Sanchez; Eva GarcÃ­a-Lopez; Antonio GarcÃ­a-Cabot	https://doi.org/10.1145/2591708.2602666	FALSE
conf/iticse/iticse2014	ITICSE	2014	340	1	Poster session I	Remote pair programming (RPP) in massively open online courses (MOOCs).	Jonathan McKinsey; Samuel Joseph; Armando Fox; Daniel D. Garcia	https://doi.org/10.1145/2591708.2602667	FALSE
conf/iticse/iticse2014	ITICSE	2014	341	1	Poster session I	Impact of reward structures in an inverted course.	Diane Horton; Jennifer Campbell	https://doi.org/10.1145/2591708.2602671	FALSE
conf/iticse/iticse2014	ITICSE	2014	342	1	Poster session I	A small scale project to investigate the current and potential use of collaborative tools at sheffield hallam university.	Thomas Michael Gibson; Cheryl Middleton	https://doi.org/10.1145/2591708.2602672	FALSE
conf/iticse/iticse2014	ITICSE	2014	343	1	Poster session I	Enhancing the information assurance and security (IAS) in CS education with mobile-device based hands-on labs.	Minzhe Guo; Prabir Bhattacharya; Kai Qian; Chia-Tien Dan Lo; Xi He	https://doi.org/10.1145/2591708.2602673	FALSE
conf/iticse/iticse2014	ITICSE	2014	344	1	Posters Session II	ACM IT curricular guidance.	Robert D. Campbell; Cindy S. Tucker; Cara Tang	https://doi.org/10.1145/2591708.2602653	FALSE
conf/iticse/iticse2014	ITICSE	2014	345	1	Posters Session II	Capstone projects in computer science: evaluated by stakeholders.	Juan JosÃ© Olarte Larrea; CÃ©sar DomÃ­nguez; Francisco JosÃ© GarcÃ­a Izquierdo; Arturo Jaime Elizondo	https://doi.org/10.1145/2591708.2602655	FALSE
conf/iticse/iticse2014	ITICSE	2014	346	1	Posters Session II	Code reading exercises using run time traces.	Michael Striewe; Michael Goedicke	https://doi.org/10.1145/2591708.2602658	FALSE
conf/iticse/iticse2014	ITICSE	2014	347	1	Posters Session II	The challenge of teaching students the value of programming best practices.	Daniel Toll; Tobias Olsson; Anna Wingkvist; Morgan Ericsson	https://doi.org/10.1145/2591708.2602659	FALSE
conf/iticse/iticse2014	ITICSE	2014	348	1	Posters Session II	Playing with metaphors: a methodology to design video games for learning abstract programming concepts.	Jeisson Hidalgo-CÃ©spedes; Gabriela MarÃ­n RaventÃ³s; Vladimir Lara-VillagrÃ¡n	https://doi.org/10.1145/2591708.2602661	FALSE
conf/iticse/iticse2014	ITICSE	2014	349	1	Posters Session II	An interactive visualization method of constructionist teaching and learning of geometry.	Egle Jasute	https://doi.org/10.1145/2591708.2602662	FALSE
conf/iticse/iticse2014	ITICSE	2014	350	1	Posters Session II	Using reflections in a program integrating course.	Viggo Kann	https://doi.org/10.1145/2591708.2602664	FALSE
conf/iticse/iticse2014	ITICSE	2014	351	1	Posters Session II	Mastering model-driven engineering.	HÃ¥kan Burden; Tom Adawi	https://doi.org/10.1145/2591708.2602665	FALSE
conf/iticse/iticse2014	ITICSE	2014	352	1	Posters Session II	The effect of computer science on the learning of computational physics.	Rivka Taub; Mordechai Ben-Ari; Michal Armoni	https://doi.org/10.1145/2591708.2602668	FALSE
conf/iticse/iticse2014	ITICSE	2014	353	1	Posters Session II	Algorithmic thinking for ALL: a motivational perspective.	ZoltÃ¡n KÃ¡tai	https://doi.org/10.1145/2591708.2602669	FALSE
conf/iticse/iticse2014	ITICSE	2014	354	1	Posters Session II	Mining job ads to find what skills are sought after from an employers' perspective on IT graduates.	Morgan Ericsson; Anna Wingkvist	https://doi.org/10.1145/2591708.2602670	FALSE
conf/iticse/iticse2014	ITICSE	2014	355	1	Posters Session II	Brain-based teaching in programming courses.	Barbara Sabitzer; Stefan Pasterk	https://doi.org/10.1145/2591708.2602674	FALSE
conf/iticse/iticse2014	ITICSE	2014	356	1	Poster session I	Why is programming so hard to learn?	Gillian M. Bain; Ian Barnes	https://doi.org/10.1145/2591708.2602675	FALSE
conf/iticse/iticse2014	ITICSE	2014	357	1	Posters Session II	Mastery grids: an open-source social educational progress visualization.	Tomasz Dominik Loboda; Julio Guerra; Roya Hosseini; Peter Brusilovsky	https://doi.org/10.1145/2591708.2609840	FALSE
conf/iticse/iticse2015	ITICSE	2015	1	1	Keynote Addresses	From Algorithmic to Computational Thinking: On the Way for Computing for all Students.	Maciej M. Soyslo	https://doi.org/10.1145/2729094.2742582	FALSE
conf/iticse/iticse2015	ITICSE	2015	2	1	Keynote Addresses	In Defense of Programming.	Mordechai Ben-Ari	https://doi.org/10.1145/2729094.2742581	FALSE
conf/iticse/iticse2015	ITICSE	2015	43532	6	Innovative Technologies for Learning I	The JaeOS Project and the Î¼ARM Emulator.	Marco Melletti; Michael Goldweber; Renzo Davoli	https://doi.org/10.1145/2729094.2742596	TRUE
conf/iticse/iticse2015	ITICSE	2015	43722	6	Innovative Technologies for Learning I	A Teaching Assistant for Algorithm Construction.	Patrice Frison	https://doi.org/10.1145/2729094.2742588	TRUE
conf/iticse/iticse2015	ITICSE	2015	15-20	6	Innovative Technologies for Learning I	FrenchPress Gives Students Automated Feedback on Java Program Flaws.	Hannah Blau; J. Eliot B. Moss	https://doi.org/10.1145/2729094.2742622	TRUE
conf/iticse/iticse2015	ITICSE	2015	21-26	6	K-12 CS Challenges	Questions on Spoken Language and Terminology for Teaching Computer Science.	Ira Diethelm; Juliana Goschler	https://doi.org/10.1145/2729094.2742600	TRUE
conf/iticse/iticse2015	ITICSE	2015	27-32	6	K-12 CS Challenges	How Challenging are Bebras Tasks?: An IRT Analysis Based on the Performance of Italian Students.	Carlo Bellettini; Violetta Lonati; Dario Malchiodi; Mattia Monga; Anna Morpurgo; Mauro Torelli	https://doi.org/10.1145/2729094.2742603	TRUE
conf/iticse/iticse2015	ITICSE	2015	33-38	6	K-12 CS Challenges	Changing Culture: Educating the Next Computer Scientists.	Deborah Adshead; Charles Boisvert; David Love; Phil Spencer	https://doi.org/10.1145/2729094.2742610	TRUE
conf/iticse/iticse2015	ITICSE	2015	39-44	6	Assessment	Semi-Automatic Assessment of Unrestrained Java Code: A Library, a DSL, and a Workbench to Assess Exams and Exercises.	David Insa; Josep Silva	https://doi.org/10.1145/2729094.2742615	TRUE
conf/iticse/iticse2015	ITICSE	2015	45-50	6	Assessment	Planting Bugs: A System for Testing Students' Unit Tests.	Samuel A. Brian; Richard N. Thomas; James M. Hogan; Colin J. Fidge	https://doi.org/10.1145/2729094.2742631	TRUE
conf/iticse/iticse2015	ITICSE	2015	51-56	6	Assessment	Evaluation of Source Code with Item Response Theory.	Marc Berges; Peter Hubwieser	https://doi.org/10.1145/2729094.2742619	TRUE
conf/iticse/iticse2015	ITICSE	2015	57-62	6	Computational Thinking	Computational Thinking and Child Performance in a Preschool.	Gustavo Caetano; Osvaldo Oliveira	https://doi.org/10.1145/2729094.2742592	TRUE
conf/iticse/iticse2015	ITICSE	2015	63-68	6	Computational Thinking	Design and Preliminary Results From a Computational Thinking Course.	Dennis G. Kafura; Austin Cory Bart; Bushra Chowdhury	https://doi.org/10.1145/2729094.2742593	TRUE
conf/iticse/iticse2015	ITICSE	2015	69-74	6	Computational Thinking	Supporting Computational Algorithmic Thinking (SCAT): Exploring the difficulties African-American middle school girls face while enacting computational algorithmic thinking.	Jakita O. Thomas	https://doi.org/10.1145/2729094.2742605	TRUE
conf/iticse/iticse2015	ITICSE	2015	75-80	6	Software Engineering Course Development	Using Unity to Teach Game Development: When You've Never Written a Game.	Paul E. Dickson	https://doi.org/10.1145/2729094.2742591	TRUE
conf/iticse/iticse2015	ITICSE	2015	81-86	6	Software Engineering Course Development	An Experimental Project Course to Prepare Students for Agile Web Application Development.	Nicholas K. Clark; John Mark Pullen; Christopher D. Bashioum	https://doi.org/10.1145/2729094.2742636	TRUE
conf/iticse/iticse2015	ITICSE	2015	87-92	6	Software Engineering Course Development	Teaching Git on the Side: Version Control System as a Course Platform.	Lassi Haaranen; Teemu Lehtinen	https://doi.org/10.1145/2729094.2742608	TRUE
conf/iticse/iticse2015	ITICSE	2015	93-98	6	Gamification	A Game Engine in Pure Python for CS1: Design, Experience, and Limits.	John Aycock; Etienne Pitout; Sarah Storteboom	https://doi.org/10.1145/2729094.2742590	TRUE
conf/iticse/iticse2015	ITICSE	2015	99-104	6	Gamification	Facilitating Programming Success in Data Science Courses through Gamified Scaffolding and Learn2Mine.	Paul E. Anderson; Thomas Nash; RenÃ©e A. McCauley	https://doi.org/10.1145/2729094.2742597	TRUE
conf/iticse/iticse2015	ITICSE	2015	105-110	6	Gamification	Applied Computer History: Experience Teaching Systems Topics through Retrogames.	John Aycock	https://doi.org/10.1145/2729094.2742583	TRUE
conf/iticse/iticse2015	ITICSE	2015	111-116	6	Gender and Diversity	Gender Gap in Academia: Perceptions of Female Computer Science Academics.	Katrina E. Falkner; Claudia Szabo; Dee Michell; Anna Szorenyi; Shantel Thyer	https://doi.org/10.1145/2729094.2742595	TRUE
conf/iticse/iticse2015	ITICSE	2015	117-122	6	Gender and Diversity	Gender Differences in Factors Influencing Pursuit of Computer Science and Related Fields.	Jennifer Wang; Hai Hong; Jason Ravitz; Marielena Ivory	https://doi.org/10.1145/2729094.2742611	TRUE
conf/iticse/iticse2015	ITICSE	2015	123-128	6	Gender and Diversity	A Computer Science Linked-courses Learning Community.	Amber Settle; John Lalor; Theresa Steinbach	https://doi.org/10.1145/2729094.2742621	TRUE
conf/iticse/iticse2015	ITICSE	2015	129-134	6	Computer Security Education	VIGvisual: A Visualization Tool for the VigenÃ¨re Cipher.	Can Li; Jun Ma; Jun Tao; Jean Mayo; Ching-Kuang Shene; Melissa S. Keranen; Chaoli Wang	https://doi.org/10.1145/2729094.2742589	TRUE
conf/iticse/iticse2015	ITICSE	2015	135-140	6	Computer Security Education	The Impact of Learning Style Adaptivity in Teaching Computer Security.	Mohammad Alshammari; Rachid Anane; Robert J. Hendley	https://doi.org/10.1145/2729094.2742614	TRUE
conf/iticse/iticse2015	ITICSE	2015	141-146	6	Computer Security Education	RBACvisual: A Visualization Tool for Teaching Access Control using Role-based Access Control.	Man Wang; Jean Mayo; Ching-Kuang Shene; Thomas Lake; Steve Carr; Chaoli Wang	https://doi.org/10.1145/2729094.2742627	TRUE
conf/iticse/iticse2015	ITICSE	2015	147-152	6	K-12 CS Courses	The Exploring Computer Science Course, Attendance and Math Achievement.	Daniel W. Lewis; Lisa Kohne; Timothy Mechlinski; Mariana Schmalstig	https://doi.org/10.1145/2729094.2742598	TRUE
conf/iticse/iticse2015	ITICSE	2015	153-158	6	K-12 CS Courses	Enhancing Robot Programming with Visual Feedback and Augmented Reality.	StÃ©phane Magnenat; Mordechai Ben-Ari; Severin Klingler; Robert W. Sumner	https://doi.org/10.1145/2729094.2742585	TRUE
conf/iticse/iticse2015	ITICSE	2015	159-164	6	K-12 CS Courses	A Comparison of Preschool and Elementary School Children Learning Computer Science Concepts through a Multilanguage Robot Programming Platform.	MarÃ­a Cecilia MartÃ­nez; Marcos J. Gomez; Luciana Benotti	https://doi.org/10.1145/2729094.2742599	TRUE
conf/iticse/iticse2015	ITICSE	2015	165-170	6	Student Activity Research	Using Learning Analytics to Visualise Computer Science Teamwork.	Hamid Tarmazdi; Rebecca Vivian; Claudia Szabo; Katrina E. Falkner; Nickolas J. G. Falkner	https://doi.org/10.1145/2729094.2742613	TRUE
conf/iticse/iticse2015	ITICSE	2015	171-176	6	Student Activity Research	Question-Posing strategies used by students for exploring Data Structures.	Shitanshu Mishra; Sridhar Iyer	https://doi.org/10.1145/2729094.2742635	TRUE
conf/iticse/iticse2015	ITICSE	2015	177-182	6	Student Activity Research	Enhancements to Support Functions of Distributed Pair Programming Based on Action Analysis.	Tomoyuki Urai; Takeshi Umezawa; Noritaka Osawa	https://doi.org/10.1145/2729094.2742616	TRUE
conf/iticse/iticse2015	ITICSE	2015	183-188	6	Active Learning	Using the Readiness Assurance Process and Metacognition in an Operating Systems Course.	Michael S. Kirkpatrick; Samantha Prins	https://doi.org/10.1145/2729094.2742594	TRUE
conf/iticse/iticse2015	ITICSE	2015	189-194	6	Active Learning	Combining Challenge-Based Learning and Scrum Framework for Mobile Application Development.	Alan R. Santos; Afonso Sales; Paulo Fernandes; Mark Nichols	https://doi.org/10.1145/2729094.2742602	TRUE
conf/iticse/iticse2015	ITICSE	2015	195-200	6	Novice CS Students	Teaching Pervasive Computing to CS Freshmen: A Multidisciplinary Approach.	Natalia Silvis-Cividjian	https://doi.org/10.1145/2729094.2742584	TRUE
conf/iticse/iticse2015	ITICSE	2015	201-206	6	Novice CS Students	A Quantitative Study of the Relative Difficulty for Novices of Writing Seven Different Types of SQL Queries.	Alireza Ahadi; Julia Coleman Prior; Vahid Behbood; Raymond Lister	https://doi.org/10.1145/2729094.2742620	TRUE
conf/iticse/iticse2015	ITICSE	2015	207-212	6	Tangible Media	Tangible Media Approaches to Introductory Computer Science.	Evan Barba; Stevie Chancellor	https://doi.org/10.1145/2729094.2742612	TRUE
conf/iticse/iticse2015	ITICSE	2015	213-218	6	Tangible Media	Teaching Software Engineering with LEGO Serious Play.	Stan Kurkovsky	https://doi.org/10.1145/2729094.2742604	TRUE
conf/iticse/iticse2015	ITICSE	2015	219-224	6	Tangible Media	A TUI-based Programming Tool for Children.	Danli Wang; Lan Zhang; Yunfeng Qi; Fang Sun	https://doi.org/10.1145/2729094.2742630	TRUE
conf/iticse/iticse2015	ITICSE	2015	225-230	6	Reflections on Teaching	Reflections on Teaching Refactoring: A Tale of Two Projects.	Shamsa Abid; Hamid Abdul Basit; Naveed Arshad	https://doi.org/10.1145/2729094.2742617	TRUE
conf/iticse/iticse2015	ITICSE	2015	231-236	6	Reflections on Teaching	Teacher Perspectives on Web Design Instruction.	Hauwa Muibi; Brian Dorn; Thomas H. Park	https://doi.org/10.1145/2729094.2742606	TRUE
conf/iticse/iticse2015	ITICSE	2015	237-241	5	Reflections on Teaching	Academic Integrity and Professional Integrity in Computing Education.	Simon; Judy Sheard	https://doi.org/10.1145/2729094.2742633	FALSE
conf/iticse/iticse2015	ITICSE	2015	242-247	6	Student Engagement I	Measures of Student Engagement in Computer Science.	Jane Sinclair; Matthew Butler; Michael Morgan; Sara Kalvala	https://doi.org/10.1145/2729094.2742586	TRUE
conf/iticse/iticse2015	ITICSE	2015	248-253	6	Student Engagement I	Predicting Success in University First Year Computing Science Courses: The Role of Student Participation in Reflective Learning Activities and in I-clicker Activities.	Diana Cukierman	https://doi.org/10.1145/2729094.2742623	TRUE
conf/iticse/iticse2015	ITICSE	2015	254-259	6	Student Engagement I	Examining Classroom Interventions to Reduce Procrastination.	Stephen H. Edwards; Joshua Martin; Clifford A. Shaffer	https://doi.org/10.1145/2729094.2742632	TRUE
conf/iticse/iticse2015	ITICSE	2015	260-265	6	Innovative Technologies for Learning II	A Teaching System to Learn Programming: the Programmer's Learning Machine.	Martin Quinson; GÃ©rald Oster	https://doi.org/10.1145/2729094.2742626	TRUE
conf/iticse/iticse2015	ITICSE	2015	266-271	6	Innovative Technologies for Learning II	Introducing Formal Methods via Program Derivation.	Dipak L. Chaudhari; Om P. Damani	https://doi.org/10.1145/2729094.2742628	TRUE
conf/iticse/iticse2015	ITICSE	2015	272-277	6	Innovative Technologies for Learning II	Task-Adapted Concept Map Scaffolding to Support Quizzes in an Online Environment.	Thushari Atapattu; Katrina E. Falkner; Nickolas J. G. Falkner	https://doi.org/10.1145/2729094.2742634	TRUE
conf/iticse/iticse2015	ITICSE	2015	278-283	6	Teaching Methods	A New Approach To Teaching Red Black Tree.	Franceska Xhakaj; Chun W. Liew	https://doi.org/10.1145/2729094.2742624	TRUE
conf/iticse/iticse2015	ITICSE	2015	284-289	6	Teaching Methods	Enriching a Course with Web Resources: a Case Study.	Herman Koppelman	https://doi.org/10.1145/2729094.2742601	TRUE
conf/iticse/iticse2015	ITICSE	2015	290-295	6	Teaching Methods	Classroom Versus Screencast for Native Language Learners: Effect of Medium of Instruction on Knowledge of Programming.	Yogendra Pal; Sridhar Iyer	https://doi.org/10.1145/2729094.2742618	TRUE
conf/iticse/iticse2015	ITICSE	2015	296-301	6	Student Engagement II	Supporting Diverse Novice Programming Cohorts through Flexible and Incremental Visual Constructivist Pathways.	Charles Thevathayan; Margaret Hamilton	https://doi.org/10.1145/2729094.2742609	TRUE
conf/iticse/iticse2015	ITICSE	2015	302-307	6	Student Engagement II	Perseverance Measures and Attainment in First Year Computing Science Students.	Roger McDermott; Mats Daniels; Ã…sa Cajander	https://doi.org/10.1145/2729094.2742625	TRUE
conf/iticse/iticse2015	ITICSE	2015	308-313	6	Student Engagement II	Initiatives to Increase Engagement in First-Year ICT.	Matthew Butler; Michael Morgan; Judy Sheard; Simon; Katrina E. Falkner; Amali Weerasinghe	https://doi.org/10.1145/2729094.2742629	TRUE
conf/iticse/iticse2015	ITICSE	2015	314-319	6	Assignments for Learning Programming	Solving Code-tracing Problems and its Effect on Code-writing Skills Pertaining to Program Semantics.	Amruth N. Kumar	https://doi.org/10.1145/2729094.2742587	TRUE
conf/iticse/iticse2015	ITICSE	2015	320-325	6	Assignments for Learning Programming	An Incremental Hint System For Automated Programming Assignments.	Paolo Antonucci; H.-Christian Estler; Durica Nikolic; Marco Piccioni; Bertrand Meyer	https://doi.org/10.1145/2729094.2742607	TRUE
conf/iticse/iticse2015	ITICSE	2015	326-327	2	Panels	Global Perspectives on Assessing Educational Performance and Quality.	Alison Clear; Janet Carter; Amruth Kumar; Cary Laxer; Simon; Ernesto Cuadros-Vargas	https://doi.org/10.1145/2729094.2754843	FALSE
conf/iticse/iticse2015	ITICSE	2015	328	1	Tips, Techniques & Courseware I	Detailed Recordings of Student Programming Sessions.	Daniel Toll; Tobias Olsson; Morgan Ericsson; Anna Wingkvist	https://doi.org/10.1145/2729094.2754859	FALSE
conf/iticse/iticse2015	ITICSE	2015	329	1	Tips, Techniques & Courseware I	Tips and Techniques for MOOC Production.	Carlos Delgado Kloos; Carlos Alario-Hoyos; Mar PÃ©rez-SanagustÃ­n	https://doi.org/10.1145/2729094.2754860	FALSE
conf/iticse/iticse2015	ITICSE	2015	330	1	Tips, Techniques & Courseware I	Department Programs to Encourage and Support Service Learning and Community Engagement.	Douglas E. Harms	https://doi.org/10.1145/2729094.2754865	FALSE
conf/iticse/iticse2015	ITICSE	2015	331	1	Tips, Techniques & Courseware I	Tools for Outreach Presentations.	Ronald I. Greenberg; Dale Reed	https://doi.org/10.1145/2729094.2754866	FALSE
conf/iticse/iticse2015	ITICSE	2015	332	1	Tips, Techniques & Courseware II	Using Personal Robots and Myro/Java in the First Computer Science Course.	Douglas E. Harms	https://doi.org/10.1145/2729094.2754864	FALSE
conf/iticse/iticse2015	ITICSE	2015	333	1	Tips, Techniques & Courseware II	A Numpy-First Approach to Teaching CS1 to Natural Science Students.	Elizabeth Patitsas	https://doi.org/10.1145/2729094.2754861	FALSE
conf/iticse/iticse2015	ITICSE	2015	334	1	Tips, Techniques & Courseware II	RAPT: Relational Algebra Parsing Tools.	Olessia Karpova; Noel D'Souza; Diane Horton; Andrew Petersen	https://doi.org/10.1145/2729094.2754862	FALSE
conf/iticse/iticse2015	ITICSE	2015	335	1	Tips, Techniques & Courseware II	Websheets: A Templated Online Coding Exercise System.	David Alexander Griffith Pritchard	https://doi.org/10.1145/2729094.2754863	FALSE
conf/iticse/iticse2015	ITICSE	2015	336	1	Posters I	Capstone Projects Evolution over a Decade in a Computer Science Engineering Degree.	Juan JosÃ© Olarte Larrea; CÃ©sar DomÃ­nguez; Arturo Jaime Elizondo; Francisco JosÃ© GarcÃ­a Izquierdo	https://doi.org/10.1145/2729094.2754845	FALSE
conf/iticse/iticse2015	ITICSE	2015	337	1	Posters I	Keystroke Biometrics for Student Authentication: A Case Study.	Aythami Morales; Julian FiÃ©rrez-Aguilar	https://doi.org/10.1145/2729094.2754847	FALSE
conf/iticse/iticse2015	ITICSE	2015	338	1	Posters I	Learning and Teaching Computing Sustainability.	Margaret Hamilton	https://doi.org/10.1145/2729094.2754850	FALSE
conf/iticse/iticse2015	ITICSE	2015	339	1	Posters I	Delegate, Decorate, State, and Illustrate in the OOP Course.	Mark A. Boshart; Martha J. Kosa	https://doi.org/10.1145/2729094.2754853	FALSE
conf/iticse/iticse2015	ITICSE	2015	340	1	Posters I	Automatic Categorization of Introductory Programming Students using Cluster Analysis.	Miguel A. Rubio	https://doi.org/10.1145/2729094.2754855	FALSE
conf/iticse/iticse2015	ITICSE	2015	341	1	Posters I	"Computer Science, Academia and Industry" as pedagogical model to enhance Computational thinking.	Orni Meerbaum-Salant; Bruria Haberman; Sarah Pollack	https://doi.org/10.1145/2729094.2754857	FALSE
conf/iticse/iticse2015	ITICSE	2015	342	1	Posters II	TOPT: A Tree-based Online Presentation Tool.	Yufeng Cheng; Jiayu Sun; Junfeng Hu	https://doi.org/10.1145/2729094.2754851	FALSE
conf/iticse/iticse2015	ITICSE	2015	343	1	Posters II	Thonny, : a Python IDE for Learning Programming.	Aivar Annamaa	https://doi.org/10.1145/2729094.2754849	FALSE
conf/iticse/iticse2015	ITICSE	2015	344	1	Posters II	Student Projects with Real-time Sensor Data.	Stan Kurkovsky; Melissa Mulcahy	https://doi.org/10.1145/2729094.2754846	FALSE
conf/iticse/iticse2015	ITICSE	2015	345	1	Posters II	Towards a Competency Model for Object-Oriented Programming.	Torsten Brinda; Matthias Kramer; Peter Hubwieser; Alexander Ruf	https://doi.org/10.1145/2729094.2754848	FALSE
conf/iticse/iticse2015	ITICSE	2015	346	1	Posters II	Reliability in the Assessment of Program Quality by Teaching Assistants During Code Reviews.	Michael James Scott; Gheorghita Ghinea	https://doi.org/10.1145/2729094.2754844	FALSE
conf/iticse/iticse2015	ITICSE	2015	347	1	Posters II	PCRS-C: Helping Students Learn C.	Daniel Marchena Parreira; Andrew Petersen; Michelle Craig	https://doi.org/10.1145/2729094.2754852	FALSE
conf/iticse/iticse2015	ITICSE	2015	348	1	Posters II	Virtual Learning Laboratory about Query Optimization against XML Data.	Nicoleta Liviana Tudor	https://doi.org/10.1145/2729094.2764861	FALSE
conf/iticse/iticse2015	ITICSE	2015	349	1	Posters II	Motivation and Grade Gap Related to Gender in a Programming Course.	Virginia Grande; Joachim Parrow	https://doi.org/10.1145/2729094.2754858	FALSE
conf/iticse/iticse2016	ITICSE	2016	1	1	Keynote Talks	Statistical Modeling to Better Understand CS Students.	Mehran Sahami	https://doi.org/10.1145/2899415.2925470	FALSE
conf/iticse/iticse2016	ITICSE	2016	2	1	Keynote Talks	Professional Competencies for Real?: A Question about Identity!	Mats Daniels	https://doi.org/10.1145/2899415.2925471	FALSE
conf/iticse/iticse2016	ITICSE	2016	43528	2	Session 1A: Panel session	The best Way to Unblock the Pipeline in CS is by Getting Everyone to Code in Schools: A debate.	Annemieke Craig; Catherine Lang; MaryAnne Egan; Reyyan Ayfer	https://doi.org/10.1145/2899415.2899418	FALSE
conf/iticse/iticse2016	ITICSE	2016	43595	6	Session 1B: Mobile Computing	Seven Semesters of Android Game Programming in CS2.	Michael David Black	https://doi.org/10.1145/2899415.2899470	TRUE
conf/iticse/iticse2016	ITICSE	2016	17-22	6	Session 1B: Mobile Computing	Using Interactive Exercise in Mobile Devices to Support Evidence-based Teaching and Learning.	Mohammad Muztaba Fuad; Debzani Deb; James Etim; Clay Gloster	https://doi.org/10.1145/2899415.2899467	TRUE
conf/iticse/iticse2016	ITICSE	2016	23-28	6	Session 1C: Active Learning	Student Concerns Regarding Transition into Higher Education CS.	Angela A. Siegel; Mark Zarb	https://doi.org/10.1145/2899415.2909581	TRUE
conf/iticse/iticse2016	ITICSE	2016	29-34	6	Session 1C: Active Learning	Interdisciplinary and International Game Projects for Creative Learning.	Johanna Pirker; Daphne Economou; Christian GÃ¼tl	https://doi.org/10.1145/2899415.2899448	TRUE
conf/iticse/iticse2016	ITICSE	2016	35-40	6	Session 1C: Active Learning	Teaching Programming: Understanding Lecture Capture YouTube Analytics.	Aidan McGowan; Philip Hanna; Neil Anderson	https://doi.org/10.1145/2899415.2899421	TRUE
conf/iticse/iticse2016	ITICSE	2016	41-46	6	Session 2B: Automated Feedback	Towards a Systematic Review of Automated Feedback Generation for Programming Exercises.	Hieke Keuning; Johan Jeuring; Bastiaan Heeren	https://doi.org/10.1145/2899415.2899422	TRUE
conf/iticse/iticse2016	ITICSE	2016	47-52	6	Session 2B: Automated Feedback	Automatic Grading of Programming Exercises using Property-Based Testing.	Clara Benac Earle; Lars-Ã…ke Fredlund; John Hughes	https://doi.org/10.1145/2899415.2899443	TRUE
conf/iticse/iticse2016	ITICSE	2016	53-58	6	Session 2B: Automated Feedback	Automated Feedback Framework for Introductory Programming Courses.	Jianxiong Gao; Bei Pang; Steven S. Lumetta	https://doi.org/10.1145/2899415.2899440	TRUE
conf/iticse/iticse2016	ITICSE	2016	59-64	6	Session 2C: Algorithms	A "Multiple Executions" Technique of Visualization.	J. Ãngel VelÃ¡zquez-Iturbide; Isidoro HernÃ¡n-Losada; Antonio PÃ©rez-Carrasco	https://doi.org/10.1145/2899415.2899451	TRUE
conf/iticse/iticse2016	ITICSE	2016	65-70	6	Session 2C: Algorithms	Algorithms + Organization = Systems.	Ali Erkan; John Barr	https://doi.org/10.1145/2899415.2899458	TRUE
conf/iticse/iticse2016	ITICSE	2016	71-76	6	Session 2C: Algorithms	Systematic Development of Dynamic Programming Algorithms Assisted by Interactive Visualization.	J. Ãngel VelÃ¡zquez-Iturbide; Antonio PÃ©rez-Carrasco	https://doi.org/10.1145/2899415.2899450	TRUE
conf/iticse/iticse2016	ITICSE	2016	77-82	6	Session 3A: Professional Practice	Lessons Learned on Computer Science Teachers Professional Development.	MarÃ­a Cecilia MartÃ­nez; Marcos J. Gomez; Marco Moresi; Luciana Benotti	https://doi.org/10.1145/2899415.2899460	TRUE
conf/iticse/iticse2016	ITICSE	2016	83-88	6	Session 3A: Professional Practice	Out of the Comfort Zone: Embedding Entrepreneurship in a Cohort of Computer Science Doctoral Students.	Oonagh McGee; Matthew Forshaw; Barry Hodgson; Steve J. Caughey	https://doi.org/10.1145/2899415.2899469	TRUE
conf/iticse/iticse2016	ITICSE	2016	89-94	6	Session 3A: Professional Practice	Using a Student Consultant in a Computer Science Course: An Experience Report.	Eli Rose; Cynthia Taylor	https://doi.org/10.1145/2899415.2899434	TRUE
conf/iticse/iticse2016	ITICSE	2016	95-100	6	Session 3B: Interactive Experiences	Using Student Performance to Assess CS Unplugged Activities in a Classroom Environment.	Brandon Rodriguez; Cyndi Rader; Tracy Camp	http://doi.org/10.1145/2899415.2899465	TRUE
conf/iticse/iticse2016	ITICSE	2016	101-105	5	Session 3B: Interactive Experiences	Interactive Exercises for Teaching Logic Circuits.	Ville Karavirta; Rolf LindÃ©n; Einari Kurvinen; Mikko-Jussi Laakso	https://doi.org/10.1145/2899415.2899445	FALSE
conf/iticse/iticse2016	ITICSE	2016	106-111	6	Session 3B: Interactive Experiences	An Empirical Analysis of Video Viewing Behaviors in Flipped CS1 Courses.	Suzanne L. Dazo; Nicholas R. Stepanek; Robert Fulkerson; Brian Dorn	https://doi.org/10.1145/2899415.2899468	TRUE
conf/iticse/iticse2016	ITICSE	2016	112-117	6	Session 3C: K-12 Instruction	Introducing Computational Thinking to K-5 in a French Context.	Vanea Chiprianov; Laurent Gallon	https://doi.org/10.1145/2899415.2899439	TRUE
conf/iticse/iticse2016	ITICSE	2016	118-123	6	Session 3C: K-12 Instruction	Back to School: Computer Science Unplugged in the Wild.	Renate Thies; Jan Vahrenhold	https://doi.org/10.1145/2899415.2899442	TRUE
conf/iticse/iticse2016	ITICSE	2016	124-129	6	Session 3C: K-12 Instruction	From Alice to Python. Introducing Text-based Programming in Middle Schools.	Nour Tabet; Huda Gedawy; Hanan Alshikhabobakr; Saquib Razak	https://doi.org/10.1145/2899415.2899462	TRUE
conf/iticse/iticse2016	ITICSE	2016	130-135	6	Session 4A: Instructional Technologies	Competition and Feedback through Automated Assessment in a Data Structures and Algorithms Course.	Tommy FÃ¤rnqvist; Fredrik Heintz	https://doi.org/10.1145/2899415.2899454	TRUE
conf/iticse/iticse2016	ITICSE	2016	136-141	6	Session 4A: Instructional Technologies	A Generic Framework for Engaging Online Data Sources in Introductory Programming Courses.	Nadeem Abdul Hamid	https://doi.org/10.1145/2899415.2899437	TRUE
conf/iticse/iticse2016	ITICSE	2016	142-147	6	Session 4B: Diversity Issues	A STEM Incubator to Engage Students in Hands-on, Relevant Learning: A Report from the Field.	Jennifer Burg; V. Paul Pauca; William H. Turkett Jr.; Peter Santago II	https://doi.org/10.1145/2899415.2899461	TRUE
conf/iticse/iticse2016	ITICSE	2016	148-153	6	Session 4B: Diversity Issues	ERSP: A Structured CS Research Program for Early-College Students.	Michael Barrow; Shelby Thomas; Christine Alvarado	https://doi.org/10.1145/2899415.2899436	TRUE
conf/iticse/iticse2016	ITICSE	2016	154-159	6	Session 4C: Exam Issues	Benchmarking Introductory Programming Exams: How and Why.	Simon; Judy Sheard; Daryl J. D'Souza; Peter Klemperer; Leo Porter; Juha Sorva; Martijn Stegeman; Daniel Zingaro	https://doi.org/10.1145/2899415.2899473	TRUE
conf/iticse/iticse2016	ITICSE	2016	160-165	6	Session 4C: Exam Issues	Typing Patterns and Authentication in Practical Programming Exams.	Juho Leinonen; Krista Longi; Arto Klami; Alireza Ahadi; Arto Vihavainen	https://doi.org/10.1145/2899415.2899472	TRUE
conf/iticse/iticse2016	ITICSE	2016	166-167	2	Session 5A: Panel Session	Latin American Perspectives and the IT2017 Curricular Guidelines.	John Impagliazzo; Ernesto Cuadros-Vargas; Gonzalo Begazo Escobedo; Juan JosÃ© Miranda del Solar; Mihaela Sabin; Barbara Viola	https://doi.org/10.1145/2899415.2899419	FALSE
conf/iticse/iticse2016	ITICSE	2016	168-173	6	Session 5B: Software Engineering	Using Fast Model-Based Fault Localisation to Aid Students in Self-Guided Program Repair and to Improve Assessment.	Geoff Birch; Bernd Fischer; Michael Poppleton	https://doi.org/10.1145/2899415.2899433	TRUE
conf/iticse/iticse2016	ITICSE	2016	174-179	6	Session 5B: Software Engineering	Teaching DevOps and Cloud Computing using a Cognitive Apprenticeship and Story-Telling Approach.	Henrik BÃ¦rbak Christensen	https://doi.org/10.1145/2899415.2899426	TRUE
conf/iticse/iticse2016	ITICSE	2016	180-185	6	Session 5B: Software Engineering	Software Engineering Education in Chile - Status Report.	Maira Marques; Sergio F. Ochoa; MarÃ­a Cecilia Bastarrica	https://doi.org/10.1145/2899415.2899459	TRUE
conf/iticse/iticse2016	ITICSE	2016	186-191	6	Session 5C: CS Education Research	Results from a Survey of Faculty Adoption of Process Oriented Guided Inquiry Learning (POGIL) in Computer Science.	Helen H. Hu; Clifton Kussmaul; Brian Knaeble; Chris Mayfield; Aman Yadav	https://doi.org/10.1145/2899415.2899471	TRUE
conf/iticse/iticse2016	ITICSE	2016	192-197	6	Session 5C: CS Education Research	The Effectiveness of Visualization for Learning Expression Evaluation: A Reproducibility Study.	Amruth N. Kumar	https://doi.org/10.1145/2899415.2899427	TRUE
conf/iticse/iticse2016	ITICSE	2016	198-203	6	Session 5C: CS Education Research	Investigating Factors Influencing Students' Intention to Dropout Computer Science Studies.	Ilias O. Pappas; Michail N. Giannakos; Letizia Jaccheri	https://doi.org/10.1145/2899415.2899455	TRUE
conf/iticse/iticse2016	ITICSE	2016	204-205	2	Session 6A: Panel Session	Global Perspectives on the Role of Two-Year/Technical/Junior Colleges in Computing Education.	Cara Tang; Elizabeth K. Hawthorne; Cindy S. Tucker; Ernesto Cuadros-Vargas; Diana Cukierman; Simon; Ming Zhang	https://doi.org/10.1145/2899415.2899420	FALSE
conf/iticse/iticse2016	ITICSE	2016	206-211	6	Session 6B: Motivational Issues	Motivation, Optimal Experience and Flow in First Year Computing Science.	Roger McDermott; Mark Zarb; Mats Daniels; Ã…sa Cajander; Tony Clear	https://doi.org/10.1145/2899415.2899474	TRUE
conf/iticse/iticse2016	ITICSE	2016	212-217	6	Session 6B: Motivational Issues	Where You Sit MattersHow Classroom Seating Might Affect Marks.	David Insa; Josep Silva; Salvador Tamarit	https://doi.org/10.1145/2899415.2899444	TRUE
conf/iticse/iticse2016	ITICSE	2016	218-223	6	Session 6B: Motivational Issues	On the Number of Attempts Students Made on Some Online Programming Exercises During Semester and their Subsequent Performance on Final Exam Questions.	Alireza Ahadi; Raymond Lister; Arto Vihavainen	https://doi.org/10.1145/2899415.2899452	TRUE
conf/iticse/iticse2016	ITICSE	2016	224-229	6	Session 6C: Tools	Making Formal Methods More Relevant to Software Engineering Students via Automated Test Generation.	Gene Fisher; Corrigan Johnson	https://doi.org/10.1145/2899415.2899424	TRUE
conf/iticse/iticse2016	ITICSE	2016	230-235	6	Session 6C: Tools	AESvisual: A Visualization Tool for the AES Cipher.	Jun Ma; Jun Tao; Jean Mayo; Ching-Kuang Shene; Melissa S. Keranen; Chaoli Wang	https://doi.org/10.1145/2899415.2899425	TRUE
conf/iticse/iticse2016	ITICSE	2016	236-241	6	Session 6C: Tools	Can Interaction Patterns with Supplemental Study Tools Predict Outcomes in CS1?	Anthony Estey; Yvonne Coady	https://doi.org/10.1145/2899415.2899428	TRUE
conf/iticse/iticse2016	ITICSE	2016	242-243	2	Session 7A: Tips, techniques & Courseware	Evidence-based Teaching with the Help of Mobile Response System (MRS).	Mohammad Muztaba Fuad; Debzani Deb	https://doi.org/10.1145/2899415.2925498	FALSE
conf/iticse/iticse2016	ITICSE	2016	244-245	2	Session 7A: Tips, techniques & Courseware	Teaching the First Programming Course with Python's Turtle Graphic Library.	Elizabeth Vidal Duarte	https://doi.org/10.1145/2899415.2925499	FALSE
conf/iticse/iticse2016	ITICSE	2016	246-247	2	Session 7A: Tips, techniques & Courseware	A LEGO-based Approach to Introducing Test-Driven Development.	Stan Kurkovsky	https://doi.org/10.1145/2899415.2925500	FALSE
conf/iticse/iticse2016	ITICSE	2016	248-249	2	Session 7A: Tips, techniques & Courseware	An Improved Approach for Interactive Ebooks.	Thomas Way	https://doi.org/10.1145/2899415.2925502	FALSE
conf/iticse/iticse2016	ITICSE	2016	250-251	2	Session 7A: Tips, techniques & Courseware	Collaborative Content Creation among All Students in a Class through a Literature Review Activity (and an Informal Introduction to Machine Learning).	Diana Cukierman	https://doi.org/10.1145/2899415.2925501	FALSE
conf/iticse/iticse2016	ITICSE	2016	252-253	2	Session 7A: Tips, techniques & Courseware	Employing Multiple-Answer Multiple Choice Questions.	Andrew Petersen; Michelle Craig; Paul Denny	https://doi.org/10.1145/2899415.2925503	FALSE
conf/iticse/iticse2016	ITICSE	2016	254-255	2	Session 7A: Tips, techniques & Courseware	Learning Computer Science Languages in Enki.	JosÃ© Carlos Paiva; JosÃ© Paulo Leal; Ricardo Alexandre Peixoto QueirÃ³s	https://doi.org/10.1145/2899415.2925504	FALSE
conf/iticse/iticse2016	ITICSE	2016	256-257	2	Session 7A: Tips, techniques & Courseware	Teaching Abstraction, Function and Reuse in the first class of CS1: A Lightbot Experience.	Marco Aedo Lopez; Elizabeth Vidal Duarte; Eveling Castro Gutierrez; Alfredo Paz Valderrama	https://doi.org/10.1145/2899415.2925505	FALSE
conf/iticse/iticse2016	ITICSE	2016	258-259	2	Session 7A: Tips, techniques & Courseware	Instructional Module Development System (IMODS).	Srividya K. Bansal; Odesma Dalrymple	https://doi.org/10.1145/2899415.2925506	FALSE
conf/iticse/iticse2016	ITICSE	2016	260-265	6	Session 7B: Data Driven Automation	Data-Driven Test Case Generation for Automated Programming Assessment.	Terry Tang; Rebecca Smith; Scott Rixner; Joe Warren	https://doi.org/10.1145/2899415.2899423	TRUE
conf/iticse/iticse2016	ITICSE	2016	266-271	6	Session 7B: Data Driven Automation	Integrating the Learning Objectives and Syllabus into a Domain Ontology for Data structures Course.	Rekha Ramesh; M. Sasikumar; Sridhar Iyer	https://doi.org/10.1145/2899415.2899453	TRUE
conf/iticse/iticse2016	ITICSE	2016	272-277	6	Session 7B: Data Driven Automation	nee	Alireza Ahadi; Julia Coleman Prior; Vahid Behbood; Raymond Lister	https://doi.org/10.1145/2899415.2899464	TRUE
conf/iticse/iticse2016	ITICSE	2016	278-283	6	Session 7C: Introductory Programming	Introductory Programming: Let Us Cut through the Clutter!	Abhiram G. Ranade	https://doi.org/10.1145/2899415.2899430	TRUE
conf/iticse/iticse2016	ITICSE	2016	284-289	6	Session 7C: Introductory Programming	Learning to Program is Easy.	Andrew Luxton-Reilly	https://doi.org/10.1145/2899415.2899432	TRUE
conf/iticse/iticse2016	ITICSE	2016	290-295	6	Session 7C: Introductory Programming	Developing a Rubric for a Creative CS Principles Lab.	Veronica CatetÃ©; Erin Snider; Tiffany Barnes	https://doi.org/10.1145/2899415.2899449	TRUE
conf/iticse/iticse2016	ITICSE	2016	296-301	6	Session 8A: Skills & Misconceptions	A New Metric to Quantify Repeated Compiler Errors for Novice Programmers.	Brett A. Becker	https://doi.org/10.1145/2899415.2899463	TRUE
conf/iticse/iticse2016	ITICSE	2016	302-307	6	Session 8A: Skills & Misconceptions	Reading Hierarchies in Code: Assessment of a Basic Computational Skill.	Thomas H. Park; Meen Chul Kim; Sukrit Chhabra; Brian Lee; Andrea Forte	https://doi.org/10.1145/2899415.2899435	TRUE
conf/iticse/iticse2016	ITICSE	2016	308-313	6	Session 8A: Skills & Misconceptions	Programming Misconceptions in an Introductory Level Programming Course Exam.	Einari Kurvinen; Niko Hellgren; Erkki Kaila; Mikko-Jussi Laakso; Tapio Salakoski	https://doi.org/10.1145/2899415.2899447	TRUE
conf/iticse/iticse2016	ITICSE	2016	314-319	6	Session 8B: Pedagogical Issues	Design and Use of Static Scaffolding Techniques to Support Java Programming on a Mobile Phone.	Charity Chao Mbogo; Edwin Blake; Hussein Suleman	https://doi.org/10.1145/2899415.2899456	TRUE
conf/iticse/iticse2016	ITICSE	2016	320-325	6	Session 8B: Pedagogical Issues	Factors for Success in Online CS1.	Jennifer Campbell; Diane Horton; Michelle Craig	https://doi.org/10.1145/2899415.2899457	TRUE
conf/iticse/iticse2016	ITICSE	2016	326-331	6	Session 8B: Pedagogical Issues	Applying Validated Pedagogy to MOOCs: An Introductory Programming Course with Media Computation.	Katrina Falkner; Nickolas J. G. Falkner; Claudia Szabo; Rebecca Vivian	https://doi.org/10.1145/2899415.2899429	TRUE
conf/iticse/iticse2016	ITICSE	2016	332-337	6	Session 8C: Curriculum Issues	Enki: A Pedagogical Services Aggregator for Learning Programming Languages.	JosÃ© Carlos Paiva; JosÃ© Paulo Leal; Ricardo Alexandre Peixoto QueirÃ³s	https://doi.org/10.1145/2899415.2899441	TRUE
conf/iticse/iticse2016	ITICSE	2016	338-343	6	Session 8C: Curriculum Issues	Towards a Technical Skills Curriculum to Supplement Traditional Computer Science Teaching.	Craig Marais; Karen Bradshaw	https://doi.org/10.1145/2899415.2899446	TRUE
conf/iticse/iticse2016	ITICSE	2016	344-349	6	Session 8C: Curriculum Issues	: Can a Business Intelligence Analysis Sourced from Open Data form a Nifty Assignment?	Matthew Love; Charles Boisvert; Elizabeth Uruchurtu; Ian Ibbotson	https://doi.org/10.1145/2899415.2899431	TRUE
conf/iticse/iticse2016	ITICSE	2016	350	1	Poster Session	Multidisciplinary Minor in Forensics in a Small Liberal Arts University.	Aparna Mahadev; Anne Falke; Penny Martin; Maura Pavao	https://doi.org/10.1145/2899415.2925473	FALSE
conf/iticse/iticse2016	ITICSE	2016	351	1	Poster Session	Lab Activity Question Queue Software.	Durell Bouchard	https://doi.org/10.1145/2899415.2925474	FALSE
conf/iticse/iticse2016	ITICSE	2016	352	1	Poster Session	Didactical Ideas in Computer Science.	Beatriz Rabin; Sylvia da Rosa	https://doi.org/10.1145/2899415.2925475	FALSE
conf/iticse/iticse2016	ITICSE	2016	353	1	Poster Session	Industry Perspectives and the IT2017 Report.	Barbara Viola	https://doi.org/10.1145/2899415.2925476	FALSE
conf/iticse/iticse2016	ITICSE	2016	354	1	Poster Session	Influence of the Programming Environment on Programming Education.	Daisuke Saito; Hironori Washizaki; Yoshiaki Fukazawa	https://doi.org/10.1145/2899415.2925477	FALSE
conf/iticse/iticse2016	ITICSE	2016	355	1	Poster Session	Reduction Patterns: A Practical Tool for Proving Undecidability.	Judith Gal-Ezer; Mark B. Trakhtenbrot	https://doi.org/10.1145/2899415.2925478	FALSE
conf/iticse/iticse2016	ITICSE	2016	356	1	Poster Session	UNIXvisual: A Visualization Tool for Teaching the UNIX Permission Model.	Man Wang; Jean Mayo; Ching-Kuang Shene; Steve Carr; Chaoli Wang	https://doi.org/10.1145/2899415.2925479	FALSE
conf/iticse/iticse2016	ITICSE	2016	357	1	Poster Session	ACM Undergraduate Curricular Guidance in Computer Science: The First Two Years.	Cara Tang; Elizabeth K. Hawthorne; Cindy S. Tucker	https://doi.org/10.1145/2899415.2925480	FALSE
conf/iticse/iticse2016	ITICSE	2016	358	1	Poster Session	Learning MMIX in Secondary School Through Conjecture, Critique, and Experimentation.	Emma H. Wong; Steven H. Hassani	https://doi.org/10.1145/2899415.2925481	FALSE
conf/iticse/iticse2016	ITICSE	2016	359	1	Poster Session	Challenges of Introducing Computer Science into the Traditional Grammar of K-12 Schooling.	Maria Emilia Echeveste	https://doi.org/10.1145/2899415.2925482	FALSE
conf/iticse/iticse2016	ITICSE	2016	360	1	Poster Session	Comparing Topics in CS Syllabus with Topics in CS Research.	Julio Santisteban; Danet Delgado-Castillo	https://doi.org/10.1145/2899415.2925483	FALSE
conf/iticse/iticse2016	ITICSE	2016	361	1	Poster Session	RoBlock: Programming Learning with Mobile Robotics.	Pedro G. FeijÃ³o; Mario Fernando De la Rosa Rosero	https://doi.org/10.1145/2899415.2925484	FALSE
conf/iticse/iticse2016	ITICSE	2016	362	1	Poster Session	Broader and Earlier Access to Machine Learning.	Thomas Way; Lillian N. Cassel; Paula Matuszek; Mary-Angela Papalaskari; Divya Bonagiri; Aravinda Gaddam	https://doi.org/10.1145/2899415.2925485	FALSE
conf/iticse/iticse2016	ITICSE	2016	363	1	Poster Session	A Parallel, Conjoined Approach to Interdisciplinary Computer Science Education.	Thomas Way; Seth Whidden	https://doi.org/10.1145/2899415.2925486	FALSE
conf/iticse/iticse2016	ITICSE	2016	364	1	Poster Session	A Web-Based Environment for Introductory Programming based on a Bi-Directional Layered Notional Machine.	Li Sui; Jens Dietrich; Eva Heinrich; Manfred Meyer	https://doi.org/10.1145/2899415.2925487	FALSE
conf/iticse/iticse2016	ITICSE	2016	365	1	Poster Session	Better Online Teaching Support Using Open-Source Web Applications.	Dorian Voegeli; Nicholas K. Clark; John Mark Pullen	https://doi.org/10.1145/2899415.2925489	FALSE
conf/iticse/iticse2016	ITICSE	2016	366	1	Poster Session	Make and Learn: A CS Principles Course Based on the Arduino Platform.	Ingrid Russell; Karen H. Jin; Mihaela Sabin	https://doi.org/10.1145/2899415.2925490	FALSE
conf/iticse/iticse2016	ITICSE	2016	367	1	Poster Session	Improving Student Performance in a First Programming Course.	Liliana Machuca; Oswaldo Solarte PabÃ³n	https://doi.org/10.1145/2899415.2925492	FALSE
conf/iticse/iticse2016	ITICSE	2016	368	1	Poster Session	Potigol, a Programming Language for Beginners.	Leonardo R. Lucena; MÃ¡rcia Lucena	https://doi.org/10.1145/2899415.2925493	FALSE
conf/iticse/iticse2016	ITICSE	2016	369	1	Poster Session	Implementation of a Robotics and IoT Laboratory for Undergraduate Research in Computer Science Courses.	Jorge Leoncio Guerra Guerra; FÃ©lix Armando FermÃ­n PÃ©rez	https://doi.org/10.1145/2899415.2925494	FALSE
conf/iticse/iticse2016	ITICSE	2016	370	1	Poster Session	How Can We Improve Student Workflow Practices to Better Enable Student Success in CS1?	Anthony Estey; Yvonne Coady	https://doi.org/10.1145/2899415.2925495	FALSE
conf/iticse/iticse2016	ITICSE	2016	371	1	Poster Session	Teaching High School Students Computational Thinking with Hands-on Activities.	Wei-Lin Li; Chiu-Fan Hu; Cheng-Chih Wu	https://doi.org/10.1145/2899415.2925496	FALSE
conf/iticse/iticse2016	ITICSE	2016	372	1	Poster Session	Applying the Whole-Part-Whole Andragogy to Computing.	Sarnath Ramnath	https://doi.org/10.1145/2899415.2925497	FALSE
conf/iticse/iticse2016	ITICSE	2016	373	1	Poster Session	Towards an Open-Source Web Security Survey Applicable University Students.	Rafael I. Bonilla; LenÃ­n Tenecela; Washington VÃ©lez; Ruddy Moncayo	https://doi.org/10.1145/2899415.2959087	FALSE
conf/iticse/iticse2017	ITICSE	2017	43467	2	Keynote Addresses	Broadening Participation in the Arab World.	Sana Odeh	https://doi.org/10.1145/3059009.3080530	FALSE
conf/iticse/iticse2017	ITICSE	2017	3	1	Keynote Addresses	Software Heritage: Scholarly and Educational Synergies with Preserving Our Software Commons.	Stefano Zacchiroli	https://doi.org/10.1145/3059009.3059066	FALSE
conf/iticse/iticse2017	ITICSE	2017	43564	6	Session 1A: Providing a Good Start	Learning to Program: Choose Your Lecture Seat Carefully!	Aidan McGowan; Philip Hanna; Des Greer; John Busch	https://doi.org/10.1145/3059009.3059020	TRUE
conf/iticse/iticse2017	ITICSE	2017	43753	6	Session 1A: Providing a Good Start	First Year Computing Students' Perceptions of Authenticity in Assessment.	Roger McDermott; Mark Zarb; Mats Daniels; Ville IsomÃ¶ttÃ¶nen	https://doi.org/10.1145/3059009.3059062	TRUE
conf/iticse/iticse2017	ITICSE	2017	16-21	6	Session 1A: Providing a Good Start	Analyzing How Interest in Learning Programming Changes During a CS0 Course: A Qualitative Study with Brazilian Undergraduates.	Pasqueline Dantas Scaico; Ruy JosÃ© Guerra Barretto de Queiroz; JosÃ© Jorge Lima Dias Jr.	https://doi.org/10.1145/3059009.3059015	TRUE
conf/iticse/iticse2017	ITICSE	2017	22-27	6	Session 1B: Software Engineering and Design	Comparing Remote and Co-located Interaction in Free and Open Source Software Engineering Projects.	Kevin Buffardi	https://doi.org/10.1145/3059009.3059019	TRUE
conf/iticse/iticse2017	ITICSE	2017	28-33	6	Session 1B: Software Engineering and Design	Learning Agile with Tech Startup Software Engineering Projects.	Kevin Buffardi; Colleen Robb; David Rahn	https://doi.org/10.1145/3059009.3059063	TRUE
conf/iticse/iticse2017	ITICSE	2017	34-39	6	Session 1B: Software Engineering and Design	Student Software Designs at the Undergraduate Midpoint.	Lynda Thomas; Carol Zander; Chris W. Loftus; Anna Eckerdal	https://doi.org/10.1145/3059009.3059016	TRUE
conf/iticse/iticse2017	ITICSE	2017	40-45	6	Session 2A: CS 1	Initial Experiences with a CS + Law Introduction to Computer Science (CS 1).	Robert H. Sloan; Cynthia Taylor; Richard Warner	https://doi.org/10.1145/3059009.3059029	TRUE
conf/iticse/iticse2017	ITICSE	2017	46-51	6	Session 2A: CS 1	A Hybrid Open/Closed Lab for CS 1.	Timothy Urness	https://doi.org/10.1145/3059009.3059014	TRUE
conf/iticse/iticse2017	ITICSE	2017	52-57	6	Session 2A: CS 1	Opening a (Sliding) Window to Advanced Topics.	Orna Muller; Ayelet Butman; Moshe Butman	https://doi.org/10.1145/3059009.3059041	TRUE
conf/iticse/iticse2017	ITICSE	2017	58-63	6	Session 2B: Off the Beaten Path	Media Literacy as a By-Product of Collaborative Video Production by CS Students.	Anna Vasilchenko; David Philip Green; Haneen Qarabash; Anne Preston; Tom Bartindale; Madeline Balaam	https://doi.org/10.1145/3059009.3059047	TRUE
conf/iticse/iticse2017	ITICSE	2017	64-69	6	Session 2B: Off the Beaten Path	Raspberry Pi as a Platform for the Internet of Things Projects: Experiences and Lessons.	Stan Kurkovsky; Chad Williams	https://doi.org/10.1145/3059009.3059028	TRUE
conf/iticse/iticse2017	ITICSE	2017	70-75	6	Session 2B: Off the Beaten Path	An Experience-based Comparison of Unity and Unreal for a Stand-alone 3D Game Development Course.	Paul E. Dickson; Jeremy E. Block; Gina N. Echevarria; Kristina C. Keenan	https://doi.org/10.1145/3059009.3059013	TRUE
conf/iticse/iticse2017	ITICSE	2017	76-77	2	Session 2C: Tool, Tips, and Courseware	Curriculum Mapping as a Tool for Improving Students Satisfaction with the Choice of Courses.	Vangel V. Ajanovski	https://doi.org/10.1145/3059009.3072978	FALSE
conf/iticse/iticse2017	ITICSE	2017	78-79	2	Session 2C: Tool, Tips, and Courseware	When the Robot Meets the Turtle: A Gentle Introduction to Algorithms and Functions.	Elizabeth Vidal Duarte; Eveling Castro Gutierrez; Marco Aedo Lopez	https://doi.org/10.1145/3059009.3072974	FALSE
conf/iticse/iticse2017	ITICSE	2017	80-81	2	Session 2C: Tool, Tips, and Courseware	Immersive Algorithms: Better Visualization with Less Information.	Philip Bille; Inge Li GÃ¸rtz	https://doi.org/10.1145/3059009.3072972	FALSE
conf/iticse/iticse2017	ITICSE	2017	82-83	2	Session 2C: Tool, Tips, and Courseware	GIT: Pedagogy, Use and Administration in Undergraduate CS.	Arnold Rosenbloom; Sadia Sharmin; Andrew Wang	https://doi.org/10.1145/3059009.3072980	FALSE
conf/iticse/iticse2017	ITICSE	2017	84-85	2	Session 2C: Tool, Tips, and Courseware	Machine Learning Modules for All Disciplines.	Thomas Way; Mary-Angela Papalaskari; Lillian N. Cassel; Paula Matuszek; Carol Weiss; Yamini Praveena Tella	https://doi.org/10.1145/3059009.3072979	FALSE
conf/iticse/iticse2017	ITICSE	2017	86-87	2	Session 2C: Tool, Tips, and Courseware	A 12 Week Full Stack Web Course in 2017.	Arnold Rosenbloom; Larry Yueli Zhang	https://doi.org/10.1145/3059009.3072977	FALSE
conf/iticse/iticse2017	ITICSE	2017	88-89	2	Session 2C: Tool, Tips, and Courseware	TetrisOS and BreakoutOS: Assembly Language Projects for Computer Organization.	Michael Black	https://doi.org/10.1145/3059009.3072976	FALSE
conf/iticse/iticse2017	ITICSE	2017	90-91	2	Session 2C: Tool, Tips, and Courseware	Courseware: HFOSS Project Evaluation.	Heidi J. C. Ellis; Gregory W. Hislop; Darci Burdge	https://doi.org/10.1145/3059009.3072975	FALSE
conf/iticse/iticse2017	ITICSE	2017	92-97	6	Session 3A: Educational Tools: Programming Support	Automatic Grading and Feedback using Program Repair for Introductory Programming Courses.	Sagar Parihar; Ziyaan Dadachanji; Praveen Kumar Singh; Rajdeep Das; Amey Karkare; Arnab Bhattacharya	https://doi.org/10.1145/3059009.3059026	TRUE
conf/iticse/iticse2017	ITICSE	2017	98-103	6	Session 3A: Educational Tools: Programming Support	An Automated System for Interactively Learning Software Testing.	Rebecca Smith; Terry Tang; Joe Warren; Scott Rixner	https://doi.org/10.1145/3059009.3059022	TRUE
conf/iticse/iticse2017	ITICSE	2017	104-109	6	Session 3A: Educational Tools: Programming Support	DevEventTracker: Tracking Development Events to Assess Incremental Development and Procrastination.	Ayaan M. Kazerouni; Stephen H. Edwards; T. Simin Hall; Clifford A. Shaffer	https://doi.org/10.1145/3059009.3059050	TRUE
conf/iticse/iticse2017	ITICSE	2017	110-115	6	Session 3B: Code Maturity	Code Quality Issues in Student Programs.	Hieke Keuning; Bastiaan Heeren; Johan Jeuring	https://doi.org/10.1145/3059009.3059061	TRUE
conf/iticse/iticse2017	ITICSE	2017	116-121	6	Session 3B: Code Maturity	Experiences in Teaching and Learning Requirements Engineering on a Sound Didactical Basis.	Yvonne Sedelmaier; Dieter Landes	https://doi.org/10.1145/3059009.3059011	TRUE
conf/iticse/iticse2017	ITICSE	2017	122-127	6	Session 3B: Code Maturity	About Programming Maturity in Finnish High Schools: A Comparison Between High School and University Students' Programming Skills.	Erkki Kaila; Rolf LindÃ©n; Erno Lokkila; Mikko-Jussi Laakso	https://doi.org/10.1145/3059009.3059021	TRUE
conf/iticse/iticse2017	ITICSE	2017	128-133	6	Session 3C: Selecting / Training the Teaching Staff	Nailing the TA Interview: Using a Rubric to Hire Teaching Assistants.	Dan Leyzberg; JÃ©rÃ©mie O. Lumbroso; Christopher Moretti	https://doi.org/10.1145/3059009.3059057	TRUE
conf/iticse/iticse2017	ITICSE	2017	134-139	6	Session 3C: Selecting / Training the Teaching Staff	Bridging the Gap Between Desired and Actual Qualifications of Teaching Assistants: An Experience Report.	Francisco J. Estrada; Anya Tafliovich	https://doi.org/10.1145/3059009.3059023	TRUE
conf/iticse/iticse2017	ITICSE	2017	140-145	6	Session 3C: Selecting / Training the Teaching Staff	A Comparison of Online and Hybrid Professional Development for CS Principles Teachers.	Jennifer Rosato; Chery Lucarelli; Cassandra Beckworth; Ralph Morelli	https://doi.org/10.1145/3059009.3059060	TRUE
conf/iticse/iticse2017	ITICSE	2017	146-151	6	Session 4A: Exams and Exam Preparation	Examining a Student-Generated Question Activity Using Random Topic Assignment.	Paul Denny; Ewan D. Tempero; Dawn Garbett; Andrew Petersen	https://doi.org/10.1145/3059009.3059033	TRUE
conf/iticse/iticse2017	ITICSE	2017	152-157	6	Session 4A: Exams and Exam Preparation	Impact of Performance Level and Group Composition on Student Learning during Collaborative Exams.	Yingjun Cao; Leo Porter	https://doi.org/10.1145/3059009.3059024	TRUE
conf/iticse/iticse2017	ITICSE	2017	158-163	6	Session 4A: Exams and Exam Preparation	Study Habits, Exam Performance, and Confidence: How Do Workflow Practices and Self-Efficacy Ratings Align?	Anthony Estey; Yvonne Coady	https://doi.org/10.1145/3059009.3059056	TRUE
conf/iticse/iticse2017	ITICSE	2017	164-169	6	Session 4B: K-12 Computing Education	Application of the Delphi Method in Computer Science Principles Rubric Creation.	Veronica CatetÃ©; Tiffany Barnes	https://doi.org/10.1145/3059009.3059042	TRUE
conf/iticse/iticse2017	ITICSE	2017	170-175	6	Session 4B: K-12 Computing Education	Educational Magic Tricks Based on Error-Detection Schemes.	Ronald I. Greenberg	https://doi.org/10.1145/3059009.3059034	TRUE
conf/iticse/iticse2017	ITICSE	2017	176-181	6	Session 4B: K-12 Computing Education	Playfully Coding: Embedding Computer Science Outreach in Schools.	Hannah Dee; Xefi Cufi; Alfredo Milani; Marius Marian; Valentina Poggioni; Olivier Aubreton; Anna Roura Rabionet; Tomi Rowlands	https://doi.org/10.1145/3059009.3059038	TRUE
conf/iticse/iticse2017	ITICSE	2017	182-187	6	Session 4C: Educational Tools	High-Coverage Hint Generation for Massive Courses: Do Automated Hints Help CS1 Students?	Phitchaya Mangpo Phothilimthana; Sumukh Sridhara	https://doi.org/10.1145/3059009.3059058	TRUE
conf/iticse/iticse2017	ITICSE	2017	188-193	6	Session 4C: Educational Tools	CodeWorkout: Short Programming Exercises with Built-in Data Collection.	Stephen H. Edwards; Krishnan Panamalai Murali	https://doi.org/10.1145/3059009.3059055	TRUE
conf/iticse/iticse2017	ITICSE	2017	194-199	6	Session 4C: Educational Tools	UNIXvisual: A Visualization Tool for Teaching UNIX Permissions.	Man Wang; Jean Mayo; Ching-Kuang Shene; Steve Carr; Chaoli Wang	https://doi.org/10.1145/3059009.3059031	TRUE
conf/iticse/iticse2017	ITICSE	2017	200-205	6	Session 5A: CS Learning	Understanding the Effects of Intervention on Computer Science Student Behaviour in On-line Forums.	Daniel La Vista; Nickolas J. G. Falkner; Claudia Szabo	https://doi.org/10.1145/3059009.3059053	TRUE
conf/iticse/iticse2017	ITICSE	2017	206-211	6	Session 5A: CS Learning	Identifying Domain-Specific Cognitive Strategies for Software Engineering.	Shifa-e-Zehra Haidry; Katrina E. Falkner; Claudia Szabo	https://doi.org/10.1145/3059009.3059032	TRUE
conf/iticse/iticse2017	ITICSE	2017	212-217	6	Session 5A: CS Learning	Specification by Example for Educational Purposes.	Isabelle Blasquez; HervÃ© Leblanc	https://doi.org/10.1145/3059009.3059039	TRUE
conf/iticse/iticse2017	ITICSE	2017	218-223	6	Session 5B: K-12 Computing Education II	The Solothurn Project: Bringing Computer Science Education to Primary Schools in Switzerland.	Anna Lamprou; Alexander Repenning; Nora A. Escherle	https://doi.org/10.1145/3059009.3059017	TRUE
conf/iticse/iticse2017	ITICSE	2017	224-229	6	Session 5B: K-12 Computing Education II	Computational Thinking in Italian Schools: Quantitative Data and Teachers' Sentiment Analysis after Two Years of.	Isabella Corradini; Michael Lodi; Enrico Nardelli	https://doi.org/10.1145/3059009.3059040	TRUE
conf/iticse/iticse2017	ITICSE	2017	230-235	6	Session 5B: K-12 Computing Education II	Computing Curriculum in Middle Schools: An Experience Report.	Samah Al Sabbagh; Huda Gedawy; Hanan Alshikhabobakr; Saquib Razak	https://doi.org/10.1145/3059009.3059012	TRUE
conf/iticse/iticse2017	ITICSE	2017	236-237	2	Session 5C: Panel	International Perspectives on CS Teacher Formation and Professional Development.	Francesco Maiorana; Miles Berry; Mark Nelson; Chery Lucarelli; Margot Phillipps; Shitanshu Mishra; Andrea Benassi	https://doi.org/10.1145/3059009.3059067	FALSE
conf/iticse/iticse2017	ITICSE	2017	238-243	6	Session 6A: Academic Integrity	Plagiarism in Take-home Exams: Help-seeking, Collaboration, and Systematic Cheating.	Arto Hellas; Juho Leinonen; Petri Ihantola	https://doi.org/10.1145/3059009.3059065	TRUE
conf/iticse/iticse2017	ITICSE	2017	244-249	6	Session 6A: Academic Integrity	Strategies for Maintaining Academic Integrity in First-Year Computing Courses.	Judy Sheard; Simon; Matthew Butler; Katrina Falkner; Michael Morgan; Amali Weerasinghe	https://doi.org/10.1145/3059009.3059064	TRUE
conf/iticse/iticse2017	ITICSE	2017	250-251	2	Session 6C: Panel	Academic-Industry Collaborations: Effective Measures for Successful Engagement.	Irene Polycarpou; Panayiotis Andreou; Cary Laxer; Stan Kurkovsky	https://doi.org/10.1145/3059009.3095098	FALSE
conf/iticse/iticse2017	ITICSE	2017	252-256	5	Session 7A: Gender & Diversity in Computing	Broadening Participation in Computing: Examining Experiences of Girls of Color.	Allison Scott; Alexis Martin; Frieda McAlear; Sonia Koshy	https://doi.org/10.1145/3059009.3059054	FALSE
conf/iticse/iticse2017	ITICSE	2017	257-262	6	Session 7A: Gender & Diversity in Computing	Out from the Shadows: Encouraging Girls in New Zealand into IT Careers.	Alison Hunter; Raewyn Boersen	https://doi.org/10.1145/3059009.3059010	TRUE
conf/iticse/iticse2017	ITICSE	2017	263-268	6	Session 7A: Gender & Diversity in Computing	Insights on Gender Differences in CS1: A Multi-institutional, Multi-variate Study.	Keith Quille; Natalie Culligan; Susan Bergin	https://doi.org/10.1145/3059009.3059048	TRUE
conf/iticse/iticse2017	ITICSE	2017	269-274	6	Session 7B: Non-Majors	Linking Language & Thinking with Code: Computing within a Writing-Intensive Introduction to the Liberal Arts.	Keith J. O'Hara; Kathleen Burke; Diana Ruggiero; Sven Anderson	https://doi.org/10.1145/3059009.3059018	TRUE
conf/iticse/iticse2017	ITICSE	2017	275-280	6	Session 7B: Non-Majors	A First Look at the Year in Computing.	Sebastian Dziallas; Sally Fincher; Colin G. Johnson; Ian Utting	https://doi.org/10.1145/3059009.3059049	TRUE
conf/iticse/iticse2017	ITICSE	2017	281-286	6	Session 7B: Non-Majors	Computing for Medicine: An Experience Report.	Jennifer Campbell; Michelle Craig; Marcus Law	https://doi.org/10.1145/3059009.3059027	TRUE
conf/iticse/iticse2017	ITICSE	2017	287-292	6	Session 7C: Feedback	On the Educational Impact of Lecture Recording Reduction: Evidence from a Randomised Trial.	Michael James Scott; Gheorghita Ghinea	https://doi.org/10.1145/3059009.3059037	TRUE
conf/iticse/iticse2017	ITICSE	2017	293-298	6	Session 7C: Feedback	Silence, Words, or Grades: The Effects of Lecturer Feedback in Multi-Revision Assignments.	Claudia Szabo; Nickolas J. G. Falkner	https://doi.org/10.1145/3059009.3059030	TRUE
conf/iticse/iticse2017	ITICSE	2017	299-304	6	Session 7C: Feedback	Learning Dimensions: Lessons from Field Studies.	Christopher Martin; Janet Hughes; John Richards	https://doi.org/10.1145/3059009.3059046	TRUE
conf/iticse/iticse2017	ITICSE	2017	305-310	6	Session 8A: Programming	On the Ability to Reason About Program Behaviour: A Think-Aloud Study.	Cruz Izu; Cheryl Pope; Amali Weerasinghe	https://doi.org/10.1145/3059009.3059036	TRUE
conf/iticse/iticse2017	ITICSE	2017	311-316	6	Session 8A: Programming	How Tool Support and Peer Scoring Improved Our Students' Attitudes Toward Peer Reviews.	Daniel Toll; Anna Wingkvist	https://doi.org/10.1145/3059009.3059059	TRUE
conf/iticse/iticse2017	ITICSE	2017	317-322	6	Session 8A: Programming	Evaluating Test Suite Effectiveness and Assessing Student Code via Constraint Logic Programming.	Kyle Dewey; Phillip Conrad; Michelle Craig; Elena Morozova	https://doi.org/10.1145/3059009.3059051	TRUE
conf/iticse/iticse2017	ITICSE	2017	323-328	6	Session 8B: Enhancing CS Instruction	Use of Gamification to Teach Agile Values and Collaboration: A multi-week Scrum simulation project in an undergraduate software engineering course.	Sonja Hof; Martin Kropp; Marla Landolt	https://doi.org/10.1145/3059009.3059043	TRUE
conf/iticse/iticse2017	ITICSE	2017	329-334	6	Session 8B: Enhancing CS Instruction	Practical Robotics in Computer Science Using the LEGO NXT: An Experience Report.	Francisco J. Estrada	https://doi.org/10.1145/3059009.3059025	TRUE
conf/iticse/iticse2017	ITICSE	2017	335-340	6	Session 8B: Enhancing CS Instruction	Teaching Operating Systems Concepts with SystemTap.	Darragh O'Brien	https://doi.org/10.1145/3059009.3059045	TRUE
conf/iticse/iticse2017	ITICSE	2017	341-346	6	Session 7C: Gamification	Improved Mobile Robot Programming Performance through Real-time Program Assessment.	RÃ©my Siegfried; Severin Klingler; Markus H. Gross; Robert W. Sumner; Francesco Mondada; StÃ©phane Magnenat	https://doi.org/10.1145/3059009.3059044	TRUE
conf/iticse/iticse2017	ITICSE	2017	347-352	6	Session 7C: Gamification	TrAcademic: Improving Participation and Engagement in CS1/CS2 with Gamified Practicals.	Brian Harrington; Ayaan Chaudhry	https://doi.org/10.1145/3059009.3059052	TRUE
conf/iticse/iticse2017	ITICSE	2017	353-358	6	Session 7C: Gamification	Programming as a Performance: Live-streaming and Its Implications for Computer Science Education.	Lassi Haaranen	https://doi.org/10.1145/3059009.3059035	TRUE
conf/iticse/iticse2017	ITICSE	2017	359	1	Poster Session I	Teaching Computational Thinking to 8-Year-Olds through ScratchJr.	Hylke H. Faber; Jan Salvador van der Ven; Menno D. M. Wierdsma	https://doi.org/10.1145/3059009.3072986	FALSE
conf/iticse/iticse2017	ITICSE	2017	360	1	Poster Session I	K-12 Teachers Experiences with Computing: A Case Study.	Steve Cooper; Susan H. Rodger; Kathy Isbister; Madeleine Schep; RoxAnn H. Stalvey; Lance C. Perez	https://doi.org/10.1145/3059009.3072989	FALSE
conf/iticse/iticse2017	ITICSE	2017	361	1	Poster Session I	Designing an Undergraduate Minor Program in E-Discovery.	Milton Luoma; Jigang Liu; Kai Qian	https://doi.org/10.1145/3059009.3072996	FALSE
conf/iticse/iticse2017	ITICSE	2017	362	1	Poster Session I	Alignment of Undergraduate Curriculum for Learning IoT in a Computer Science Faculty.	Jorge Leoncio Guerra Guerra; FÃ©lix Armando FermÃ­n PÃ©rez	https://doi.org/10.1145/3059009.3073001	FALSE
conf/iticse/iticse2017	ITICSE	2017	363	1	Poster Session I	Using Common Problem Sets to Increase Student Engagement and Retention in CS2.	Aparna Mahadev; Elena Braynova	https://doi.org/10.1145/3059009.3072981	FALSE
conf/iticse/iticse2017	ITICSE	2017	364	1	Poster Session I	New Trends in Teaching Programming in Secondary Education in Slovakia.	Janka MajherovÃ¡; Jana JackovÃ¡	https://doi.org/10.1145/3059009.3072997	FALSE
conf/iticse/iticse2017	ITICSE	2017	365	1	Poster Session I	A Graph-based Approach to Analyze and Compare Computer Science Curricula for Primary and Lower Secondary Education.	Stefan Pasterk; Andreas Bollin	https://doi.org/10.1145/3059009.3072985	FALSE
conf/iticse/iticse2017	ITICSE	2017	366	1	Poster Session I	Bebras as a Teaching Resource: Classifying the Tasks Corpus Using Computational Thinking Skills.	Violetta Lonati; Dario Malchiodi; Mattia Monga; Anna Morpurgo	https://doi.org/10.1145/3059009.3072987	FALSE
conf/iticse/iticse2017	ITICSE	2017	367	1	Poster Session I	Tasks for Assessing Skills of Computational Thinking.	Tauno Palts; Margus Pedaste	https://doi.org/10.1145/3059009.3072999	FALSE
conf/iticse/iticse2017	ITICSE	2017	368	1	Poster Session I	CodeAdventure: Learning Introductory Programming.	Giorgos Nicou; Panayiotis Andreou; Irene Polycarpou	https://doi.org/10.1145/3059009.3073002	FALSE
conf/iticse/iticse2017	ITICSE	2017	369	1	Poster Session I	Build Your Future: Guiding Student Employability.	Bruce Scharlau	https://doi.org/10.1145/3059009.3072993	FALSE
conf/iticse/iticse2017	ITICSE	2017	370	1	Poster Session I	Addressing the Paradox of Fun and Rigor in Learning Programming.	Mohsen Dorodchi; Nasrin Dehbozorgi	https://doi.org/10.1145/3059009.3073004	FALSE
conf/iticse/iticse2017	ITICSE	2017	371	1	Poster Session II	Building a Secure Hacking Lab in a Small University.	Nadimpalli V. R. Mahadev	https://doi.org/10.1145/3059009.3072982	FALSE
conf/iticse/iticse2017	ITICSE	2017	372	1	Poster Session II	Visualization for Secure Coding in C.	James W. Walker; Jean Mayo; Ching-Kuang Shene; Steve Carr	https://doi.org/10.1145/3059009.3072990	FALSE
conf/iticse/iticse2017	ITICSE	2017	373	1	Poster Session II	E-Assessment and Bring Your Own Device.	Bastian KÃ¼ppers; Ulrik Schroeder	https://doi.org/10.1145/3059009.3072994	FALSE
conf/iticse/iticse2017	ITICSE	2017	374	1	Poster Session II	Discovering Indicators of Commitment in Computer-Supported Collaborative Student Teams.	Antti Knutas; Jouni Ikonen; Laura Anna Ripamonti; Dario Maggiorini; Jari Porras	https://doi.org/10.1145/3059009.3072995	FALSE
conf/iticse/iticse2017	ITICSE	2017	375	1	Poster Session II	Labware for Secure Mobile Software Development (SMSD) Education.	Kai Qian; Hossain Shahriar; Fan Wu; Lixin Tao; Prabir Bhattacharya	https://doi.org/10.1145/3059009.3072983	FALSE
conf/iticse/iticse2017	ITICSE	2017	376	1	Poster Session II	testSQL: Learn SQL the Interactive Way.	Joshua License	https://doi.org/10.1145/3059009.3072991	FALSE
conf/iticse/iticse2017	ITICSE	2017	377	1	Poster Session II	Yellow and Red Cards to Deal with Hitchhiking in Groups.	Herman Koppelman	https://doi.org/10.1145/3059009.3072992	FALSE
conf/iticse/iticse2017	ITICSE	2017	378	1	Poster Session II	A Course Based on Open Organization Principles.	Heidi J. C. Ellis; Gregory W. Hislop	https://doi.org/10.1145/3059009.3072998	FALSE
conf/iticse/iticse2017	ITICSE	2017	379	1	Poster Session II	Self-Assess Competency as Yes/No: A Preliminary Study.	Malcolm Hutchison	https://doi.org/10.1145/3059009.3073003	FALSE
conf/iticse/iticse2017	ITICSE	2017	380	1	Poster Session II	Students' Feedback in Using GitHub in a Project Development for a Software Engineering Course.	Francesca Arcelli Fontana; Claudia Raibulet	https://doi.org/10.1145/3059009.3072984	FALSE
conf/iticse/iticse2017	ITICSE	2017	381	1	Poster Session II	Cross Cultural Project Based Learning & Soft Skills Practice.	Alexandra Badets; Becky Grasser; Stefan Peltier	https://doi.org/10.1145/3059009.3072988	FALSE
conf/iticse/iticse2017	ITICSE	2017	382	1	Poster Session II	Data Science for All: A Tale of Two Cities.	Lillian N. Cassel; Don Goelman; Michael Posner; Darina Dicheva; Christo Dichev	https://doi.org/10.1145/3059009.3073000	FALSE
conf/iticse/iticse2017	ITICSE	2017	383-384	2	Working Groups Session	Understanding International Benchmarks on Student Engagement: Awareness, Research Alignment and Response from a Computer Science Perspective.	Michael Morgan; Matthew Butler; Jane Sinclair; Gerry W. Cross; Janet Fraser; Jana JackovÃ¡; Neena Thota	https://doi.org/10.1145/3059009.3081324	FALSE
conf/iticse/iticse2017	ITICSE	2017	385	1	Working Groups Session	Game Development for Computer Science Education.	Monica McGill; Chris Johnson; James Atlas; Durell Bouchard; Laurence D. Merkle; Chris H. Messom; Ian Pollock; Michael James Scott	https://doi.org/10.1145/3059009.3081325	FALSE
conf/iticse/iticse2017	ITICSE	2017	386-387	2	Working Groups Session	Integrating International Students into Computer Science Programs: Challenges and Strategies for Success.	Michael J. Oudshoorn; Alison Clear; Janet Carter; Joseph A. Abandoh-Sam; Christabel Gonsalvez; Leo Hitchcock; Shoba Ittyipe; Aparna Mahadev; Janice L. Pearce	https://doi.org/10.1145/3059009.3081326	FALSE
conf/iticse/iticse2017	ITICSE	2017	388	1	Working Groups Session	Developing Assessments to Determine Mastery of Programming Fundamentals.	Andrew Luxton-Reilly; Brett A. Becker; Yingjun Cao; Roger McDermott; Claudio Mirolo; Andreas MÃ¼hling; Andrew Petersen; Kate Sanders; Simon; Jacqueline L. Whalley	https://doi.org/10.1145/3059009.3081327	FALSE
conf/iticse/iticse2017	ITICSE	2017	389	1	Working Groups Session	"I know it when I see it": Perceptions of Code Quality.	JÃ¼rgen BÃ¶rstler; Harald StÃ¶rrle; Daniel Toll; Jelle van Assema; Rodrigo Duran; Sara Hooshangi; Johan Jeuring; Hieke Keuning; Carsten Kleiner; Bonnie K. MacKellar	https://doi.org/10.1145/3059009.3081328	FALSE
conf/iticse/iticse2017	ITICSE	2017	390	1	Working Groups Session	Developing a Holistic Understanding of Systems and Algorithms through Research Papers.	Ali Erkan; John Barr; Tony Clear; Cruz Izu; Cristian Jose Lopez Del Alamo; Hanan Mohammed; Mahadev Nadimpalli	https://doi.org/10.1145/3059009.3081329	FALSE
conf/iticse/iticse2017	ITICSE	2017	391	1	Working Groups Session	Understanding the Effects of Lecturer Intervention on Computer Science Student Behaviour.	Claudia Szabo; Nickolas J. G. Falkner; Mohsen Dorodchi; Antti Knutas; Francesco Maiorana	https://doi.org/10.1145/3059009.3081330	FALSE
conf/iticse/iticse2017	ITICSE	2017	392	1	Working Groups Session	The Internet of Things in CS Education: Current Challenges and Future Potential.	Barry Burd; Ata Elahi; Ingrid Russell; Lecia Barker; FÃ©lix Armando FermÃ­n PÃ©rez; Bill Siever; Monica Divitini; Alcwyn Parker; Liviana Tudor; Jorge Leoncio Guerra Guerra	https://doi.org/10.1145/3059009.3081331	FALSE
conf/iticse/iticse2017	ITICSE	2017	393	1	Working Groups Session	Searching for Early Developmental Activities Leading to Computational Thinking Skills.	Quintin I. Cutts; Peter Donaldson; Elizabeth Cole; Bedour Alshaigy; Mirela Gutica; Arto Hellas; Edurne Larraza-Mendiluze; Robert McCartney; Elizabeth Patitsas; Charles Riedesel	https://doi.org/10.1145/3059009.3081332	FALSE
conf/iticse/iticse2018	ITICSE	2018	362-363	2	Session 5C: Panel	50 years of software engineering: challenges, results, and opportunities in its education.	Stephan Krusche; Bruce Scharlau; Åsa Cajander; Janet Hughes	https://doi.org/10.1145/3197091.3205848	FALSE
conf/iticse/iticse2018	ITICSE	2018	360-361	2	Session 2C: Tips, Techniques, and Courseware 1	A guideline to teach agile requirements.	Isabelle Blasquez; Hervé Leblanc	https://doi.org/10.1145/3197091.3205838	FALSE
conf/iticse/iticse2018	ITICSE	2018	43499	2	Keynotes	A new era towards more engaging and human-like computer-based learning by combining personalisation and artificial intelligence techniques.	Maria Virvou	https://doi.org/10.1145/3197091.3211886	FALSE
conf/iticse/iticse2018	ITICSE	2018	369-370	2	Session 6C: Tips, Techniques, and Courseware 2	A novel introduction to file I/O using KML and google earth.	Elizabeth Vidal; Ali Erkan	https://doi.org/10.1145/3197091.3205835	FALSE
conf/iticse/iticse2018	ITICSE	2018	342-343	2	Session 1C: Working Groups 1	A review of introductory programming research 2003-2017.	Andrew Luxton-Reilly; Simon; Ibrahim Albluwi; Brett A. Becker; Michail N. Giannakos; Amruth N. Kumar; Linda Ott; James Paterson; Michael James Scott; Judy Sheard; Claudia Szabo	https://doi.org/10.1145/3197091.3205841	FALSE
conf/iticse/iticse2018	ITICSE	2018	375	1	Posters 1	A technique for translation from problem to code.	Andrew D. Hilton; Genevieve M. Lipp; Susan H. Rodger	https://doi.org/10.1145/3197091.3205807	FALSE
conf/iticse/iticse2018	ITICSE	2018	377	1	Posters 1	An interactive online course to raise awareness about diversity.	Guido Rößling; Felix Broj	https://doi.org/10.1145/3197091.3205809	FALSE
conf/iticse/iticse2018	ITICSE	2018	344-345	2	Session 1C: Working Groups 1	An international investigation into student concerns regarding transition into higher education.	Mark Zarb; Joseph A. Abandoh-Sam; Bedour Alshaigy; Dennis J. Bouvier; Richard Glassey; Janet Hughes; Charles Riedesel	https://doi.org/10.1145/3197091.3205842	FALSE
conf/iticse/iticse2018	ITICSE	2018	99-104	6	Session 3B: K-12: Outreach	A community model of CSforALL: analysis of community commitments for CS education.	Leigh Ann DeLyser	https://doi.org/10.1145/3197091.3197142	TRUE
conf/iticse/iticse2018	ITICSE	2018	308-313	6	Session 8B: Instructional Approaches	A multi-institution exploration of peer instruction in practice.	Cynthia Taylor; Jaime Spacco; David P. Bunde; Andrew Petersen; Soohyun Nam Liao; Leo Porter	https://doi.org/10.1145/3197091.3197144	TRUE
conf/iticse/iticse2018	ITICSE	2018	392	1	Posters 2	Assessing attention in visual and textual programming using neuroeducation approaches.	Spyridon Doukakis; Mary-Angela Papalaskari; Panayiotis M. Vlamos; Antonia Plerou; Panagiota Giannopoulou	https://doi.org/10.1145/3197091.3205815	FALSE
conf/iticse/iticse2018	ITICSE	2018	314-319	6	Session 8B: Instructional Approaches	A safety-aware, systems-based approach to teaching software testing.	Natalia Silvis-Cividjian	https://doi.org/10.1145/3197091.3197096	TRUE
conf/iticse/iticse2018	ITICSE	2018	272-277	6	Session 7C: Industry Engagement	A two-staged capstone project to foster university-business dialogue.	Tullio Vardanega; Monica Fedeli	https://doi.org/10.1145/3197091.3197130	TRUE
conf/iticse/iticse2018	ITICSE	2018	51-56	6	Session 2A: Assessment for CS1	Adaptive remediation for novice programmers through personalized prescriptive quizzes.	Reza Soltanpoor; Charles Thevathayan; Daryl D'Souza	https://doi.org/10.1145/3197091.3197097	TRUE
conf/iticse/iticse2018	ITICSE	2018	254-259	6	Session 7B: Alternative Approaches to CS Education	An authentic student research experience: fostering research skills and boosting the employability profile of students.	Thanos Hatziapostolou; Dimitris Dranidis; Anna Sotiriadou; Petros Kefalas; Ioannis Nikolakopoulos	https://doi.org/10.1145/3197091.3197131	TRUE
conf/iticse/iticse2018	ITICSE	2018	105-110	6	Session 3B: K-12: Outreach	An experience report on the effectiveness of five themed workshops at inspiring high school students to learn coding.	Nearchos Paspallis; Irene Polycarpou; Panayiotis Andreou; Josephina Antoniou; Paris Kaimakis; Marios Raspopoulos; Maria Terzi	https://doi.org/10.1145/3197091.3197093	TRUE
conf/iticse/iticse2018	ITICSE	2018	212-217	6	Session 5B: Problem Solving	Analyzing rich qualitative data to study pencil-puzzle-based assignments in CS1 and CS2.	Zack Butler; Ivona Bezáková; Kimberly Fluet	https://doi.org/10.1145/3197091.3197109	TRUE
conf/iticse/iticse2018	ITICSE	2018	81-86	6	Session 3A: Assessment	Automatic assessment of OpenGL computer graphics assignments.	Burkhard C. Wünsche; Zhen Chen; Lindsay Alexander Shaw; Thomas Suselo; Kai-Cheung Leung; Davis Dimalen; Wannes van der Mark; Andrew Luxton-Reilly; Richard Lobb	https://doi.org/10.1145/3197091.3197112	TRUE
conf/iticse/iticse2018	ITICSE	2018	33-38	6	Session 1B: Artificial Intelligence	Botzone: an online multi-agent competitive platform for AI education.	Haoyu Zhou; Haifeng Zhang; Yushan Zhou; Xinchao Wang; Wenxin Li	https://doi.org/10.1145/3197091.3197099	TRUE
conf/iticse/iticse2018	ITICSE	2018	320-325	6	Session 8C: Collaborative Partnerships	Bringing together undergraduate and postgraduate students in software engineering team project: experiences and lessons.	Georgia M. Kapitsaki; Styliani Kleanthous Loizou	https://doi.org/10.1145/3197091.3197103	TRUE
conf/iticse/iticse2018	ITICSE	2018	266-271	6	Session 7C: Industry Engagement	Challenge based startup learning: a framework to teach software startup.	Rafael Chanin; Afonso Sales; Leandro Bento Pompermaier; Rafael Prikladnicki	https://doi.org/10.1145/3197091.3197122	TRUE
conf/iticse/iticse2018	ITICSE	2018	176-181	6	Session 4C: Educational Tools	CLaDS: a cloud-based virtual lab for the delivery of scalable hands-on assignments for practical data science education.	Chase Geigle; Ismini Lourentzou; Hari Sundaram; ChengXiang Zhai	https://doi.org/10.1145/3197091.3197135	TRUE
conf/iticse/iticse2018	ITICSE	2018	302-307	6	Session 8B: Instructional Approaches	Classroom experience report on jigsaw learning.	Soohyun Nam Liao; William G. Griswold; Leo Porter	https://doi.org/10.1145/3197091.3197118	TRUE
conf/iticse/iticse2018	ITICSE	2018	153-158	6	Session 4B: Teaching Programming	Code4Brownies: an active learning solution for teaching programming and problem solving in the classroom.	Vinhthuy Phan; Eric Hicks	https://doi.org/10.1145/3197091.3197128	TRUE
conf/iticse/iticse2018	ITICSE	2018	27-32	6	Session 1B: Artificial Intelligence	Collateral learning of mobile computing: an experience report.	Amruth N. Kumar	https://doi.org/10.1145/3197091.3197106	TRUE
conf/iticse/iticse2018	ITICSE	2018	290-295	6	Session 8A: Motivation, Engagement, and Retention	Considerations for switching: exploring factors behind CS students' desire to leave a CS major.	Amanpreet Kapoor; Christina Gardner-McCune	https://doi.org/10.1145/3197091.3197113	TRUE
conf/iticse/iticse2018	ITICSE	2018	63-68	6	Session 2B: K-12	Creation and validation of low-stakes rubrics for K-12 computer science.	Veronica Cateté; Nicholas Lytle; Tiffany Barnes	https://doi.org/10.1145/3197091.3197134	TRUE
conf/iticse/iticse2018	ITICSE	2018	326-331	6	Session 8C: Collaborative Partnerships	Crowdsourcing programming assignments with CrowdSorcerer.	Nea Pirttinen; Vilma Kangas; Irene Nikkarinen; Henrik Nygren; Juho Leinonen; Arto Hellas	https://doi.org/10.1145/3197091.3197117	TRUE
conf/iticse/iticse2018	ITICSE	2018	182-187	6	Session 5A: Cyber-Security	Cybersecurity in liberal arts general education curriculum.	Xenia Mountrouidou; Xiangyang Li; Quinn Burke	https://doi.org/10.1145/3197091.3197110	TRUE
conf/iticse/iticse2018	ITICSE	2018	170-175	6	Session 4C: Educational Tools	DBSnap++: creating data-driven programs by snapping blocks.	Yasin N. Silva; Anthony Nieuwenhuyse; Thomas G. Schenk; Alaura Symons	https://doi.org/10.1145/3197091.3197114	TRUE
conf/iticse/iticse2018	ITICSE	2018	194-199	6	Session 5A: Cyber-Security	Enhancing cybersecurity skills by creating serious games.	Valdemar Svábenský; Jan Vykopal; Milan Cermák; Martin Lastovicka	https://doi.org/10.1145/3197091.3197123	TRUE
conf/iticse/iticse2018	ITICSE	2018	188-193	6	Session 5A: Cyber-Security	Exercises for teaching reverse engineering.	John Aycock; Andrew Groeneveldt; Hayden Kroepfl; Tara Copplestone	https://doi.org/10.1145/3197091.3197111	TRUE
conf/iticse/iticse2018	ITICSE	2018	352-353	2	Session 2C: Tips, Techniques, and Courseware 1	Board of symbols: a tool for teaching programming.	Stephan Euler	https://doi.org/10.1145/3197091.3205833	FALSE
conf/iticse/iticse2018	ITICSE	2018	111-116	6	Session 3C: Project-Based Learning	Experience in learning test-driven development: space invaders project-driven.	Isabelle Blasquez; Hervé Leblanc	https://doi.org/10.1145/3197091.3197132	TRUE
conf/iticse/iticse2018	ITICSE	2018	260-265	6	Session 7B: Alternative Approaches to CS Education	Fit-breaks: incorporating physical activity breaks in introductory CS lectures.	Alyona Koulanova; Ary Maharaj; Brian Harrington; Jessica Dere	https://doi.org/10.1145/3197091.3197115	TRUE
conf/iticse/iticse2018	ITICSE	2018	230-235	6	Session 7A: Gender, Diversity, and Societal Aspects	Gender, confidence, and mark prediction in CS examinations.	Brian Harrington; Shichong Peng; Xiaomeng Jin; Minhaz Khan	https://doi.org/10.1145/3197091.3197116	TRUE
conf/iticse/iticse2018	ITICSE	2018	45-50	6	Session 2A: Assessment for CS1	Giving hints is complicated: understanding the challenges of an automated hint system based on frequent wrong answers.	Kristin Stephens-Martinez; Armando Fox	https://doi.org/10.1145/3197091.3197102	TRUE
conf/iticse/iticse2018	ITICSE	2018	278-283	6	Session 7C: Industry Engagement	Guidelines for software testing education objectives from industry practices with a constructive alignment approach.	Timo Hynninen; Jussi Kasurinen; Antti Knutas; Ossi Taipale	https://doi.org/10.1145/3197091.3197108	TRUE
conf/iticse/iticse2018	ITICSE	2018	248-253	6	Session 7B: Alternative Approaches to CS Education	Hackathons in the formal learning process.	Kiev Gama; Breno Alencar Gonçalves; Pedro Alessio	https://doi.org/10.1145/3197091.3197138	TRUE
conf/iticse/iticse2018	ITICSE	2018	284-289	6	Session 8A: Motivation, Engagement, and Retention	How CS academics view student engagement.	Michael Morgan; Matthew Butler; Neena Thota; Jane Sinclair	https://doi.org/10.1145/3197091.3197092	TRUE
conf/iticse/iticse2018	ITICSE	2018	218-223	6	Session 6A: e-Learning and Distance Learning	How seamless are technology-rich learning environments? the voice of IT educators.	Fui Chin Hiew; Judy Sheard; Rajendran Parthiban; Esyin Chew	https://doi.org/10.1145/3197091.3197125	TRUE
conf/iticse/iticse2018	ITICSE	2018	117-122	6	Session 3C: Project-Based Learning	How students get going: triggers for students' learning in project-based education.	Ville Isomöttönen; Aletta Nylén	https://doi.org/10.1145/3197091.3197126	TRUE
conf/iticse/iticse2018	ITICSE	2018	43564	6	Session 1A: CS1/CS2	Improving complex task performance using a sequence of simple practice tasks.	Paul Denny; Andrew Luxton-Reilly; Michelle Craig; Andrew Petersen	https://doi.org/10.1145/3197091.3197141	TRUE
conf/iticse/iticse2018	ITICSE	2018	75-80	6	Session 3A: Assessment	In-class coding-based summative assessments: tools, challenges, and experience.	An Ju; Ben Mehne; Andrew Halle; Armando Fox	https://doi.org/10.1145/3197091.3197094	TRUE
conf/iticse/iticse2018	ITICSE	2018	147-152	6	Session 4B: Teaching Programming	Instruction of introductory programming course using multiple contexts.	David W. Brown; Sheikh K. Ghafoor; Stephen Canfield	https://doi.org/10.1145/3197091.3197105	TRUE
conf/iticse/iticse2018	ITICSE	2018	141-146	6	Session 4A: Discrete Structures	Introduction to Iltis: an interactive, web-based system for teaching logic.	Gaetano Geck; Artur Ljulin; Sebastian Peter; Jonas Schmidt; Fabian Vehlken; Thomas Zeume	https://doi.org/10.1145/3197091.3197095	TRUE
conf/iticse/iticse2018	ITICSE	2018	93-98	6	Session 3B: K-12: Outreach	Is drawing video game characters in an hour of code activity a waste of time?	Ashok R. Basawapatna; Alexander Repenning; Mark Savignano; Josiane Manera; Nora A. Escherle; Lorenzo Repenning	https://doi.org/10.1145/3197091.3197136	TRUE
conf/iticse/iticse2018	ITICSE	2018	332-337	6	Session 8C: Collaborative Partnerships	ITiCSE working groups and collaboration in the computing education community.	Robert McCartney; Kate Sanders	https://doi.org/10.1145/3197091.3197143	TRUE
conf/iticse/iticse2018	ITICSE	2018	135-140	6	Session 4A: Discrete Structures	Lab exercises for a discrete structures course: exploring logic and relational algebra with Alloy.	Laura E. Brown; Adam Feltz; Charles Wallace	https://doi.org/10.1145/3197091.3197127	TRUE
conf/iticse/iticse2018	ITICSE	2018	159-164	6	Session 4B: Teaching Programming	Ladebug: an online tool to help novice programmers improve their debugging skills.	Andrew Luxton-Reilly; Emma McMillan; Elizabeth Stevenson; Ewan D. Tempero; Paul Denny	https://doi.org/10.1145/3197091.3197098	TRUE
conf/iticse/iticse2018	ITICSE	2018	200-205	6	Session 5B: Problem Solving	Problem solving to teach advanced algorithms in heterogeneous groups.	Florent Bouchez-Tichadou	https://doi.org/10.1145/3197091.3197147	TRUE
conf/iticse/iticse2018	ITICSE	2018	15-20	6	Session 1A: CS1/CS2	Programming: predicting student success early in CS1. a re-validation and replication study.	Keith Quille; Susan Bergin	https://doi.org/10.1145/3197091.3197101	TRUE
conf/iticse/iticse2018	ITICSE	2018	236-241	6	Session 7A: Gender, Diversity, and Societal Aspects	Promoting diversity in computing.	Anagha Kulkarni; Ilmi Yoon; Pleuni S. Pennings; Kazunori Okada; Carmen Domingo	https://doi.org/10.1145/3197091.3197145	TRUE
conf/iticse/iticse2018	ITICSE	2018	206-211	6	Session 5B: Problem Solving	Relationship between computational thinking and a measure of intelligence as a general problem-solving ability.	Kay-Dennis Boom; Matt Bower; Amaël Arguel; Jens Siemon; Antonia Scholkmann	https://doi.org/10.1145/3197091.3197104	TRUE
conf/iticse/iticse2018	ITICSE	2018	87-92	6	Session 3A: Assessment	SQL tester: an online SQL assessment tool and its impact.	Anthony Kleerekoper; Andrew Schofield	https://doi.org/10.1145/3197091.3197124	TRUE
conf/iticse/iticse2018	ITICSE	2018	388	1	Posters 2	Cheat me not: automated proctoring of digital exams on bring-your-own-device.	Gosia Migut; Dennis Koelma; Cees G. M. Snoek; Natasa Brouwer	https://doi.org/10.1145/3197091.3205813	FALSE
conf/iticse/iticse2018	ITICSE	2018	224-229	6	Session 6A: e-Learning and Distance Learning	Summer of code: assisting distance-learning students with open-ended programming tasks.	Neil Smith; Mike Richards; Daniel G. Cabrero	https://doi.org/10.1145/3197091.3197119	TRUE
conf/iticse/iticse2018	ITICSE	2018	69-74	6	Session 2B: K-12	Teaching how to teach computational thinking.	Anna Lamprou; Alexander Repenning	https://doi.org/10.1145/3197091.3197120	TRUE
conf/iticse/iticse2018	ITICSE	2018	242-247	6	Session 7A: Gender, Diversity, and Societal Aspects	Teaching the societal consequences of computer science: new ideas for increasing student involvement.	Bill Cowan; Elodie Fourquet; Marta Kryven	https://doi.org/10.1145/3197091.3197146	TRUE
conf/iticse/iticse2018	ITICSE	2018	123-128	6	Session 3C: Project-Based Learning	TEAMSCOPE: measuring software engineering processes with teamwork telemetry.	An Ju; Armando Fox	https://doi.org/10.1145/3197091.3197107	TRUE
conf/iticse/iticse2018	ITICSE	2018	129-134	6	Session 4A: Discrete Structures	The educational insights and opportunities afforded by the nuances of Prim's and Kruskal's MST algorithms.	Ali Erkan	https://doi.org/10.1145/3197091.3197129	TRUE
conf/iticse/iticse2018	ITICSE	2018	57-62	6	Session 2B: K-12	The impact of exploring computer science in Wisconsin: where disadvantage is an advantage.	Heather Bort; Shion Guha; Dennis Brylow	https://doi.org/10.1145/3197091.3197140	TRUE
conf/iticse/iticse2018	ITICSE	2018	346-347	2	Session 1C: Working Groups 1	Cloud computing: developing contemporary computer science curriculum for a cloud-first future.	Derek Foster; Laurie White; Joshua Adams; D. Cenk Erdil; Harvey Hyman; Stan Kurkovsky; Majd Sakr; Lee Stott	https://doi.org/10.1145/3197091.3205843	FALSE
conf/iticse/iticse2018	ITICSE	2018	296-301	6	Session 8A: Motivation, Engagement, and Retention	The impact of placement in introductory computer science courses on student persistence in a computing major.	Linda Ott; Briana Bettin; Leo Ureel	https://doi.org/10.1145/3197091.3197139	TRUE
conf/iticse/iticse2018	ITICSE	2018	21-26	6	Session 1B: Artificial Intelligence	The pedagogical model of SIAL: an adaptive and open-ended intelligent tutoring system for first order logic.	José Alberto Maestro-Prieto; Arancha Simón Hurtado	https://doi.org/10.1145/3197091.3197100	TRUE
conf/iticse/iticse2018	ITICSE	2018	354-355	2	Session 2C: Tips, Techniques, and Courseware 1	Code reviews in large, first-year courses.	Andrew Petersen; Daniel Zingaro	https://doi.org/10.1145/3197091.3205832	FALSE
conf/iticse/iticse2018	ITICSE	2018	389	1	Posters 2	Code-sharing networks of non-STEM students: the case of data science minor.	Ilya Musabirov; Alina Bakhitova	https://doi.org/10.1145/3197091.3205814	FALSE
conf/iticse/iticse2018	ITICSE	2018	39-44	6	Session 2A: Assessment for CS1	Where exactly are the difficulties in reasoning logically about code? experimentation with an online system.	Michelle Cook; Megan Fowler; Jason O. Hallstrom; Joseph E. Hollingsworth; Tim Schwab; Yu-Shan Sun; Murali Sitaraman	https://doi.org/10.1145/3197091.3197133	TRUE
conf/iticse/iticse2018	ITICSE	2018	338-339	2	Session 1C: Working Groups 1	Contrasting CS student and academic perspectives and experiences of student engagement.	Michael Morgan; Matthew Butler; Jane Sinclair; Christabel Gonsalvez; Neena Thota	https://doi.org/10.1145/3197091.3205839	FALSE
conf/iticse/iticse2018	ITICSE	2018	394	1	Posters 2	Crafting engaging programming experiences for young people in GLAM spaces: the iOi-sphere.	Alcwyn Parker; Michael James Scott	https://doi.org/10.1145/3197091.3205827	FALSE
conf/iticse/iticse2018	ITICSE	2018	1	1	Keynotes	Dancing rainbots: computing education with girl guiding.	Judy Robertson	https://doi.org/10.1145/3197091.3211885	FALSE
conf/iticse/iticse2018	ITICSE	2018	387	1	Posters 2	Data jam: introducing high school students to data science.	Saman Haqqi; Raja Sooriamurthi; Brian Macdonald; Cheryl Begandy; Judy Cameron; Berni Pirollo; Evan Becker; Jacqueline Choffo; Christopher Davis; Margaret Farrell; Jennifer Lundahl; Laura Marshall; Kyle Wyche; Aaron Zheng	https://doi.org/10.1145/3197091.3205812	FALSE
conf/iticse/iticse2018	ITICSE	2018	383	1	Posters 1	Experiences and new alternatives for teaching formal verification of Java programs.	Ana Romero; Jose Divasón	https://doi.org/10.1145/3197091.3205811	FALSE
conf/iticse/iticse2018	ITICSE	2018	340-341	2	Session 1C: Working Groups 1	Global perspectives on cybersecurity education.	Allen Parrish; John Impagliazzo; Rajendra K. Raj; Henrique M. Dinis Santos; Muhammad Rizwan Asghar; Audun Jøsang; Teresa Pereira; Vítor J. Sá; Eliana Stavrou	https://doi.org/10.1145/3197091.3205840	FALSE
conf/iticse/iticse2018	ITICSE	2018	381	1	Posters 1	How statistics are used in computing education research.	Kate Sanders; Sally Hamouda; Brett A. Becker; Anna Eckerdal; Robert McCartney; Judy Sheard; Simon	https://doi.org/10.1145/3197091.3205810	FALSE
conf/iticse/iticse2018	ITICSE	2018	391	1	Posters 2	Implementing a competency-based information technology curriculum: challenges and opportunities.	Mihaela Sabin	https://doi.org/10.1145/3197091.3205808	FALSE
conf/iticse/iticse2018	ITICSE	2018	356-357	2	Session 2C: Tips, Techniques, and Courseware 1	Improving students' engagement with large-team software development projects.	Mirela Gutica	https://doi.org/10.1145/3197091.3205836	FALSE
conf/iticse/iticse2018	ITICSE	2018	390	1	Posters 2	Inclusion of blockchain in course of distributed systems at the school of computer science.	Jorge Leoncio Guerra Guerra; Félix Armando Fermín Pérez	https://doi.org/10.1145/3197091.3205822	FALSE
conf/iticse/iticse2018	ITICSE	2018	380	1	Posters 1	Informatics study day: helping CS students become better students.	Madeleine Lorås; Trond Aalberg	https://doi.org/10.1145/3197091.3205826	FALSE
conf/iticse/iticse2018	ITICSE	2018	373-374	2	Session 6C: Tips, Techniques, and Courseware 2	Introducing big data analytics in high school and college.	Raja Sooriamurthi	https://doi.org/10.1145/3197091.3205834	FALSE
conf/iticse/iticse2018	ITICSE	2018	386	1	Posters 2	iScheduler: intelligent scheduling system for academic institutions.	Raymond Alavo; Raman Adaikkalavan; Hossein Hakimzadeh	https://doi.org/10.1145/3197091.3205824	FALSE
conf/iticse/iticse2018	ITICSE	2018	385	1	Posters 2	Lessons learned from developing advanced topics for broad use.	Lillian N. Cassel; Don Goelman; Paula Matuszek; Mary-Angela Papalaskari; Michael Posner; Thomas Way; Darina Dicheva; Christo Dichev	https://doi.org/10.1145/3197091.3205821	FALSE
conf/iticse/iticse2018	ITICSE	2018	382	1	Posters 1	Managing assignment feedback via issue tracking.	Richard Glassey	https://doi.org/10.1145/3197091.3205819	FALSE
conf/iticse/iticse2018	ITICSE	2018	348-349	2	Session 1C: Working Groups 1	Modeling global competencies for computing education.	Stephen Frezza; Arnold Pears; Mats Daniels; Viggo Kann; Amanpreet Kapoor; Roger McDermott; Anne-Kathrin Peters; Charles Wallace; Mihaela Sabin; Åsa Cajander	https://doi.org/10.1145/3197091.3205844	FALSE
conf/iticse/iticse2018	ITICSE	2018	378	1	Posters 1	Pipelining collaborative test for improving student performance in introductory programming courses.	Xinjian Luo; Qianni Deng; Tao Liao	https://doi.org/10.1145/3197091.3205817	FALSE
conf/iticse/iticse2018	ITICSE	2018	376	1	Posters 1	Preparing first-time CS student teaching assistants.	Guido Rößling; Jacqueline Gölz	https://doi.org/10.1145/3197091.3205829	FALSE
conf/iticse/iticse2018	ITICSE	2018	368	1	Session 6B: Working Groups 2	Promoting the adoption of educational innovations.	Cynthia Taylor; Jaime Spacco; David P. Bunde; Thomas Zeume; Zack Butler; Martina Barnas; Heather Bort; Francesco Maiorana; Christopher Lynnly Hovey	https://doi.org/10.1145/3197091.3205847	FALSE
conf/iticse/iticse2018	ITICSE	2018	393	1	Posters 2	Psychometric computational thinking test.	Julio Santisteban; Jennifer Santisteban-Muñoz	https://doi.org/10.1145/3197091.3205823	FALSE
conf/iticse/iticse2018	ITICSE	2018	358-359	2	Session 2C: Tips, Techniques, and Courseware 1	Reducing students' waiting time for assistance in programming laboratory sessions by using electronic queueing.	Sahand Sadjadee	https://doi.org/10.1145/3197091.3205837	FALSE
conf/iticse/iticse2018	ITICSE	2018	350-351	2	Session 2C: Tips, Techniques, and Courseware 1	Stick to the script: lightweight recording and playback of live coding.	John Aycock	https://doi.org/10.1145/3197091.3205830	FALSE
conf/iticse/iticse2018	ITICSE	2018	379	1	Posters 1	Student based program development.	Viggo Kann; Örjan Ekeberg	https://doi.org/10.1145/3197091.3205818	FALSE
conf/iticse/iticse2018	ITICSE	2018	43752	5	Session 1A: CS1/CS2	Syntax error based quantification of the learning progress of the novice programmer.	Alireza Ahadi; Raymond Lister; Luke Mathieson	https://doi.org/10.1145/3197091.3197121	FALSE
conf/iticse/iticse2018	ITICSE	2018	364-365	2	Session 6B: Working Groups 2	Taxonomizing features and methods for identifying at-risk students in computing courses.	Arto Hellas; Petri Ihantola; Andrew Petersen; Vangel V. Ajanovski; Mirela Gutica; Timo Hynninen; Antti Knutas; Juho Leinonen; Chris Messom; Soohyun Nam Liao	https://doi.org/10.1145/3197091.3205845	FALSE
conf/iticse/iticse2018	ITICSE	2018	165-169	5	Session 4C: Educational Tools	Teaching network protocol concepts in an open-source simulation environment.	J. Mark Pullen	https://doi.org/10.1145/3197091.3197137	FALSE
conf/iticse/iticse2018	ITICSE	2018	366-367	2	Session 6B: Working Groups 2	The internet of things in CS education: updating curricula and exploring pedagogy.	Barry Burd; Lecia Barker; Monica Divitini; Jorge Leoncio Guerra Guerra; Félix Armando Fermín Pérez; Ingrid Russell; Bill Siever; Liviana Tudor; Michael McCarthy; Ian Pollock	https://doi.org/10.1145/3197091.3205846	FALSE
conf/iticse/iticse2018	ITICSE	2018	384	1	Posters 1	Towards bespoke creative coding curricula: mapping structure and content in tertiary graphic design education programming courses.	Stig Møller Hansen	https://doi.org/10.1145/3197091.3205820	FALSE
conf/iticse/iticse2018	ITICSE	2018	371-372	2	Session 6C: Tips, Techniques, and Courseware 2	Using LEGO to teach software interfaces and integration.	Stan Kurkovsky	https://doi.org/10.1145/3197091.3205831	FALSE
conf/sigcse/sigcse2014	SIGCSE	2014	714	1	Poster session I	"Come code with codester": an educational app that teaches computer science (abstract only).	Gili Rusak; Darren Lim	https://doi.org/10.1145/2538862.2544308	FALSE
conf/sigcse/sigcse2014	SIGCSE	2014	718-719	2	Poster session II	A comparison of two approaches for hint generation in programming tutors (abstract only).	Andrew Hicks; Barry W. Peddycord III; Irena Rindos; Christopher Simmons	https://doi.org/10.1145/2538862.2544283	FALSE
conf/sigcse/sigcse2014	SIGCSE	2014	720	1	Poster session II	A comparison of two hands-on laboratory experiences in computers, networks and cyber security for 10th-12th graders (abstract only).	Lisa M. Marvel; Stephen Raio; Lori L. Pollock; David Arty; Gerard Chaney; Giorgio Bertoli; Christopher Paprcka; Wendy Choi; Erica Bertoli; Sandra K. Young	https://doi.org/10.1145/2538862.2544290	FALSE
conf/sigcse/sigcse2014	SIGCSE	2014	713	1	Poster session I	A first year common course on computational problem solving and programming (abstract only).	Bruce W. Char; Thomas T. Hewett	https://doi.org/10.1145/2538862.2544303	FALSE
conf/sigcse/sigcse2014	SIGCSE	2014	724	1	Poster session II	A first-year experience report on a model for statewide deployment of CS principles courses (abstract only).	Jeff Gray; Mokter Hossain; Jonathan Corley; Amber Wagner; Cassidy Lamm; Mary Boehm; Carol Crawford; Kathleen Haynie; Sheryl Packman; Deepa Muralidhar; Jeff Baker; Roy Black; Sandy Falgout; Leella Holt; Albert Lilly; Gina McCarley; James Morse; Jennie Rountree; Jill Westerlund; Carol Yarbrough	https://doi.org/10.1145/2538862.2544319	FALSE
conf/sigcse/sigcse2014	SIGCSE	2014	703-704	2	Special session	A public/private partnership for expanding computer science in schools.	Owen L. Astrachan; Amy Briggs; Gail Chapman; Joanna Goode; Rebecca Brook Osborne; Pat Yongpradit	https://doi.org/10.1145/2538862.2538992	FALSE
conf/sigcse/sigcse2014	SIGCSE	2014	729	1	Birds of a feather flock I	A town meeting: SIGCSE committee on expanding the women-in-computing community (abstract only).	Gloria Childress Townsend	https://doi.org/10.1145/2538862.2544238	FALSE
conf/sigcse/sigcse2014	SIGCSE	2014	708	1	Poster session I	ACCE: automatic coding composition evaluator (abstract only).	Stephanie Rogers; Steven Tang; Dan Garcia	https://doi.org/10.1145/2538862.2544269	FALSE
conf/sigcse/sigcse2014	SIGCSE	2014	709	1	Poster session I	ACM associate-degree IT curricular guidance (abstract only).	Elizabeth K. Hawthorne; Cara Tang; Jim Nichols; Cindy Tucker	https://doi.org/10.1145/2538862.2544278	FALSE
conf/sigcse/sigcse2014	SIGCSE	2014	175-176	2	Panel session	ACM/IEEE-CS computer science curricula 2013: implementing the final report.	Mehran Sahami; Steve Roach; Ernesto Cuadros-Vargas; Elizabeth K. Hawthorne; Amruth Kumar; Richard LeBlanc; David Reed; Remzi Seker	https://doi.org/10.1145/2538862.2538863	FALSE
conf/sigcse/sigcse2014	SIGCSE	2014	701-702	2	Special session	Advanced placement computer science: AP computer science a and AP computer science principles.	Paul T. Tymann; Frances P. Trees; Robert Glen Martin; Richard Kick; Lien Diaz	https://doi.org/10.1145/2538862.2538986	FALSE
conf/sigcse/sigcse2014	SIGCSE	2014	723-724	2	Poster session II	Adventures in hackademia: leveraging humanitarian free/open source software development in the class room (abstract only).	Remy DeCausemaker; Stephen Jacobs	https://doi.org/10.1145/2538862.2544315	FALSE
conf/sigcse/sigcse2014	SIGCSE	2014	275-276	2	Special session	Alternatives to lecture: experience peer instruction and pedagogical code reviews.	Scott Grissom; Christopher D. Hundhausen; Phillip Conrad	https://doi.org/10.1145/2538862.2538985	FALSE
conf/sigcse/sigcse2014	SIGCSE	2014	713	1	Poster session I	Altruism among programmers: the availability and effectiveness of on-line, spontaneous peer mentoring in competitive problem solving (abstract only).	David Sturgill	https://doi.org/10.1145/2538862.2544305	FALSE
conf/sigcse/sigcse2014	SIGCSE	2014	707	1	Poster session I	An analysis of difficulties encountered by novice alice programmers (abstract only).	Kuan-Yu Lin; Janet Mei-Chuen Lin; Hue-Ching Kao	https://doi.org/10.1145/2538862.2544267	FALSE
conf/sigcse/sigcse2014	SIGCSE	2014	727	1	Birds of a feather flock I	An exploration of mentor-protégé relationships and how to train future mentors (abstract only).	Elissa M. Redmiles; Jandelyn D. Plane	https://doi.org/10.1145/2538862.2544230	FALSE
conf/sigcse/sigcse2014	SIGCSE	2014	720-721	2	Poster session II	An extensible scene graph library for teaching computer graphics along the programmable pipeline (abstract only).	Volker Ahlers	https://doi.org/10.1145/2538862.2544295	FALSE
conf/sigcse/sigcse2014	SIGCSE	2014	717	1	Poster session II	An integrated approach to teaching of abstract query languages and their implementations (abstract only).	Rajshekhar Sunderraman	https://doi.org/10.1145/2538862.2544275	FALSE
conf/sigcse/sigcse2014	SIGCSE	2014	709	1	Poster session I	Analysis of interaction logs for online tutorials (abstract only).	Daniel A. Breakiron; Eric Fouh; Sally Hamouda; Clifford A. Shaffer	https://doi.org/10.1145/2538862.2544274	FALSE
conf/sigcse/sigcse2014	SIGCSE	2014	746	1	Friday Workshops	AP CS principles and the beauty and joy of computing curriculum (abstract only).	Daniel D. Garcia; Brian Harvey; Tiffany Barnes; Daniel Armendariz; Jon McKinsey; Zachary MacHardy; Omoju Miller; Barry W. Peddycord III; Eugene Lemon; Sean Morris; Josh Paley	https://doi.org/10.1145/2538862.2539026	FALSE
conf/sigcse/sigcse2014	SIGCSE	2014	707	1	Poster session I	Application of a blended active learning model in teaching computer programming to non-majors (abstract only).	Chunming Gao; Noriyuki Iwane	https://doi.org/10.1145/2538862.2544265	FALSE
conf/sigcse/sigcse2014	SIGCSE	2014	747	1	Saturday workshops	Artbotics with lego mindstorms (abstract only).	Adam Norton; Holly A. Yanco	https://doi.org/10.1145/2538862.2539004	FALSE
conf/sigcse/sigcse2014	SIGCSE	2014	545-546	2	Panel session	Blocks-based programming languages: simplifying programming for different audiences with different goals.	Paul Medlock-Walton; Kyle J. Harms; Eileen T. Kraemer; Karen Brennan; Daniel Wendel	https://doi.org/10.1145/2538862.2538873	FALSE
conf/sigcse/sigcse2014	SIGCSE	2014	79-80	2	Special Session	Bringing CS2013 recommendations for parallel and distributed computing into your CS curriculum.	Richard A. Brown; Elizabeth Shoop; Joel C. Adams	https://doi.org/10.1145/2538862.2538996	FALSE
conf/sigcse/sigcse2014	SIGCSE	2014	741	1	Wednesday workshops	CABECT: collaborating across boundaries to engage undergraduates in computational thinking (abstract only).	Sarah Monisha Pulimood; Kim Pearson; Diane C. Bates	https://doi.org/10.1145/2538862.2539016	FALSE
conf/sigcse/sigcse2014	SIGCSE	2014	737-738	2	Birds of a feather flock II	Can 3D virtual world environments and game-based learning effectively teach computer science concepts? (abstract only).	Stephanie E. August; Jungwoo Ryoo	https://doi.org/10.1145/2538862.2544264	FALSE
conf/sigcse/sigcse2014	SIGCSE	2014	731	1	Birds of a feather flock I	CAT's: not just a furry friend. using active learning in your classrooms (abstract only).	Nina S. Onesti; Saul Blanco; John Duncan; Mitja Hmeljak; Dan Richert	https://doi.org/10.1145/2538862.2544250	FALSE
conf/sigcse/sigcse2014	SIGCSE	2014	748	1	Saturday workshops	Chapel: a versatile tool for teaching undergraduates parallel programming (abstract only).	David P. Bunde; Kyle Burke	https://doi.org/10.1145/2538862.2539010	FALSE
conf/sigcse/sigcse2014	SIGCSE	2014	730	1	Birds of a feather flock I	China's perspective from the viewpoint of computational thinking on CS1 for non-majors (abstract only).	Ming Zhang; Bo Li; Ginnie Lo	https://doi.org/10.1145/2538862.2544246	FALSE
conf/sigcse/sigcse2014	SIGCSE	2014	719	1	Poster session II	Collaborative programming exercises in virtual worlds (abstract only).	Johanna Pirker; Christian Gütl; Frank Kappe	https://doi.org/10.1145/2538862.2544286	FALSE
conf/sigcse/sigcse2014	SIGCSE	2014	736	1	Birds of a feather flock II	Community engagement and service learning opportunities in computer science (abstract only).	Douglas E. Harms	https://doi.org/10.1145/2538862.2544258	FALSE
conf/sigcse/sigcse2014	SIGCSE	2014	744	1	Friday Workshops	Computational music remixing with EarSketch (abstract only).	Brian Magerko; Jason Freeman; Christopher Michaud; Michael Reilly	https://doi.org/10.1145/2538862.2539007	FALSE
conf/sigcse/sigcse2014	SIGCSE	2014	43467	2	Keynote addresses	Computational thinking for all: the power and the peril.	Robert M. Panoff	https://doi.org/10.1145/2538862.2554795	FALSE
conf/sigcse/sigcse2014	SIGCSE	2014	722-723	2	Poster session II	Copper country programmers: a novel curriculum for beginning programmers in middle and high school (abstract only).	Leo C. Ureel II; John Earnest; Charles Wallace	https://doi.org/10.1145/2538862.2544310	FALSE
conf/sigcse/sigcse2014	SIGCSE	2014	45-48	4	Software engineering: projects	Course-embedded research in software development courses.	Sonal Dekhane; Richard Price	https://doi.org/10.1145/2538862.2538927	FALSE
conf/sigcse/sigcse2014	SIGCSE	2014	743	1	Friday Workshops	Creating stimulating, relevant, and manageable introductory computer science projects that utilize real-time web-based data (abstract only).	Eli Tilevich; Clifford A. Shaffer; Austin Cory Bart	https://doi.org/10.1145/2538862.2539002	FALSE
conf/sigcse/sigcse2014	SIGCSE	2014	543-544	2	Panel session	CS principles professional development: only 9, 500 to go!	Jan Cuny; Diane A. Baxter; Daniel D. Garcia; Jeff Gray; Ralph Morelli	https://doi.org/10.1145/2538862.2538876	FALSE
conf/sigcse/sigcse2014	SIGCSE	2014	369-370	2	Panel session	CS professional development MOOCs.	Erin Mindell; Karen Brennan; Gwendolyn Britton; Jennifer S. Kay; Jennifer Rosato	https://doi.org/10.1145/2538862.2538872	FALSE
conf/sigcse/sigcse2014	SIGCSE	2014	727-728	2	Birds of a feather flock I	CSTA chapters: building a CS community (abstract only).	Frances P. Trees; Lissa Clayborn	https://doi.org/10.1145/2538862.2544233	FALSE
conf/sigcse/sigcse2014	SIGCSE	2014	733-734	2	Birds of a feather flock II	Data fluency: curricular issues for all majors (abstract only).	Suzanne W. Dietrich; Don Goelman	https://doi.org/10.1145/2538862.2544240	FALSE
conf/sigcse/sigcse2014	SIGCSE	2014	705-706	2	Panel session	Data science as an undergraduate degree.	Paul Anderson; James W. McGuffee; David Uminsky	https://doi.org/10.1145/2538862.2538868	FALSE
conf/sigcse/sigcse2014	SIGCSE	2014	724	1	Poster session II	Data-driven broadened participation (abstract only).	Michele S. Roberts	https://doi.org/10.1145/2538862.2544316	FALSE
conf/sigcse/sigcse2014	SIGCSE	2014	730	1	Birds of a feather flock I	Debugging teacher certification (abstract only).	Jian Zhang; Philip H. Sweany	https://doi.org/10.1145/2538862.2544244	FALSE
conf/sigcse/sigcse2014	SIGCSE	2014	712	1	Poster session I	Developing a game-based learning curriculum for "Big Data" in middle school (abstract only).	Allison G. Martínez-Arocho; Philip Sheridan Buffum; Kristy Elizabeth Boyer	https://doi.org/10.1145/2538862.2544296	FALSE
conf/sigcse/sigcse2014	SIGCSE	2014	718	1	Poster session II	Developing and using an in-house plugin for easy social network programming (abstract only).	Anna Koufakou; Dahai Guo	https://doi.org/10.1145/2538862.2544277	FALSE
conf/sigcse/sigcse2014	SIGCSE	2014	177-178	2	Special session	Diverse learners, diverse courses, diverse projects: learning from challenges in new directions.	Owen L. Astrachan; Rebecca Brook Osborne; Irene Lee; Bradley Beth; Jeff Gray	https://doi.org/10.1145/2538862.2538991	FALSE
conf/sigcse/sigcse2014	SIGCSE	2014	749-750	2	Saturday workshops	Dynamic program visualizations for Java (abstract only).	James H. Cross; T. Dean Hendrix; David A. Umphress	https://doi.org/10.1145/2538862.2539028	FALSE
conf/sigcse/sigcse2014	SIGCSE	2014	733	1	Birds of a feather flock II	Engaging college students in service learning to grow the K-12 computing pipeline and prepare the 21st century workforce (abstract only).	Jamie Payton; Tiffany Barnes; Jason Black; Cheryl Seals	https://doi.org/10.1145/2538862.2544232	FALSE
conf/sigcse/sigcse2014	SIGCSE	2014	741	1	Wednesday workshops	Enhancing computer science education (CSE) with the use of 3D printer technology.	Robert Lutz; Evelyn Brannock	https://doi.org/10.1145/2538862.2539020	FALSE
conf/sigcse/sigcse2014	SIGCSE	2014	734	1	Birds of a feather flock II	Ensemble: the sharing community (abstract only).	Lillian N. Cassel; Lois M. L. Delcambre; Gregory W. Hislop	https://doi.org/10.1145/2538862.2544252	FALSE
conf/sigcse/sigcse2014	SIGCSE	2014	367-368	2	Panel session	Experiences mapping and revising curricula with CS2013.	David Reed; Andrea Danyluk; Elizabeth K. Hawthorne; Mehran Sahami; Henry M. Walker	https://doi.org/10.1145/2538862.2538864	FALSE
conf/sigcse/sigcse2014	SIGCSE	2014	707-708	2	Poster session I	Exploring cognitive processes in program comprehension based on eye-movement analysis (abstract only).	Ting-Yun Hou; Yu-Tzu Lin; Yu-Chih Lin; Cheng-Chih Wu	https://doi.org/10.1145/2538862.2544268	FALSE
conf/sigcse/sigcse2014	SIGCSE	2014	743	1	Friday Workshops	Exploring computer science: computational practices in action (abstract only).	Gail Chapman; Joanna Goode	https://doi.org/10.1145/2538862.2538998	FALSE
conf/sigcse/sigcse2014	SIGCSE	2014	728	1	Birds of a feather flock I	Fighting impostor syndrome (abstract only).	Aidan L. Feldman; Matthew McCullough	https://doi.org/10.1145/2538862.2544236	FALSE
conf/sigcse/sigcse2014	SIGCSE	2014	740	1	Wednesday workshops	GENI as a virtual laboratory for networking and distributed systems classes (abstract only).	Vicraj Thomas; Niky Riga; Sarah Edwards	https://doi.org/10.1145/2538862.2539014	FALSE
conf/sigcse/sigcse2014	SIGCSE	2014	467-468	2	Panel session	Guided inquiry learning in context: perspectives on POGIL in CS.	Helen H. Hu; Matthew Lang; Clif Kussmaul; Chris Mayfield; Tammy Pirmann	https://doi.org/10.1145/2538862.2538869	FALSE
conf/sigcse/sigcse2014	SIGCSE	2014	708	1	Poster session I	Guidelines for group work in CS1 (abstract only).	Cecily Heiner	https://doi.org/10.1145/2538862.2544270	FALSE
conf/sigcse/sigcse2014	SIGCSE	2014	745	1	Friday Workshops	Guiding students to discover CS concepts and develop process skills using POGIL (abstract only).	Clifton Kussmaul; Helen H. Hu; Matthew Lang	https://doi.org/10.1145/2538862.2539019	FALSE
conf/sigcse/sigcse2014	SIGCSE	2014	746	1	Friday Workshops	Hands-on cybersecurity exercises in the EDURange framework (abstract only).	Richard S. Weiss; Jens Mache; Michael E. Locasto; Vincent Nestler	https://doi.org/10.1145/2538862.2539029	FALSE
conf/sigcse/sigcse2014	SIGCSE	2014	711-712	2	Poster session I	How do we measure success?: a new instrument for evaluating girls' progress in middle and high school computing programs (abstract only).	Catherine S. Ashcraft; Wendy M. DuBow; Zhen Wu	https://doi.org/10.1145/2538862.2544293	FALSE
conf/sigcse/sigcse2014	SIGCSE	2014	733	1	Birds of a feather flock II	How to decode student bottlenecks to learning in computer science (abstract only).	Adrian German; Suzanne Menzel; Joan Middendorf; John F. Duncan	https://doi.org/10.1145/2538862.2544228	FALSE
conf/sigcse/sigcse2014	SIGCSE	2014	719	1	Poster session II	Impact of programming language on success in high school programming contests (abstract only).	Stoney Jackson; Heidi J. C. Ellis; Robert Crouse	https://doi.org/10.1145/2538862.2544287	FALSE
conf/sigcse/sigcse2014	SIGCSE	2014	714	1	Poster session I	Implementing a living lab approach to foster innovation in an advanced software engineering course (abstract only).	Jean H. French	https://doi.org/10.1145/2538862.2544311	FALSE
conf/sigcse/sigcse2014	SIGCSE	2014	734	1	Birds of a feather flock II	Including HCI and user experience (UX) methodologies in computing curricula (abstract only).	Debra Lee Davis; Dave Berque; Janet Davis; Matt Jadud; Paul Resnick	https://doi.org/10.1145/2538862.2544249	FALSE
conf/sigcse/sigcse2014	SIGCSE	2014	735	1	Birds of a feather flock II	Incorporating mobile computing into the CS curriculum (abstract only).	Shiva Azadegan; Josh Dehlinger; Siddharth Kaza	https://doi.org/10.1145/2538862.2544254	FALSE
conf/sigcse/sigcse2014	SIGCSE	2014	729-730	2	Birds of a feather flock I	Inspiring a love of computer science through the education of our youth (abstract only).	Paige H. Meeker	https://doi.org/10.1145/2538862.2544242	FALSE
conf/sigcse/sigcse2014	SIGCSE	2014	735-736	2	Birds of a feather flock II	Integrating active learning techniques into systems courses (abstract only).	Michael S. Kirkpatrick; Leo Porter	https://doi.org/10.1145/2538862.2544256	FALSE
conf/sigcse/sigcse2014	SIGCSE	2014	710	1	Poster session I	Integrating computer science and mathematics in middle school with alice (abstract only).	Susan H. Rodger; Daniel MacDonald; Elizabeth Onstwedder; Bella Onwumbiko; Edwin Ward	https://doi.org/10.1145/2538862.2544281	FALSE
conf/sigcse/sigcse2014	SIGCSE	2014	739-740	2	Wednesday workshops	Integrating software testing into programming courses (WISTPC 2014) (abstract only).	Peter J. Clarke; Yujian Fu; James Kiper; Gursimran S. Walia	https://doi.org/10.1145/2538862.2539005	FALSE
conf/sigcse/sigcse2014	SIGCSE	2014	708-709	2	Poster session I	Intelligence and security informatics: developing curricular modules in context (abstract only).	Wingyan Chung; Albert Chan; Daniel Plante; Ray Villalobos; Joseph Woodside	https://doi.org/10.1145/2538862.2544272	FALSE
conf/sigcse/sigcse2014	SIGCSE	2014	719-720	2	Poster session II	Interactive e-learning modules for teaching secure: a pilot study (abstract only).	Sagar Raina; Blair Taylor; Siddharth Kaza	https://doi.org/10.1145/2538862.2544289	FALSE
conf/sigcse/sigcse2014	SIGCSE	2014	623-624	2	Panel session	Interdisciplinary computing in many forms.	Lillian (Boots) Cassel; Bonnie K. MacKellar; Joan Peckham; Carol Spradling; Han Reichgelt; Suzanne Westbrook; Ursula Wolz	https://doi.org/10.1145/2538862.2538866	FALSE
conf/sigcse/sigcse2014	SIGCSE	2014	724	1	Poster session II	Introducing CodeWorkout: an adaptive and social learning environment (abstract only).	Kevin Buffardi; Stephen H. Edwards	https://doi.org/10.1145/2538862.2544317	FALSE
conf/sigcse/sigcse2014	SIGCSE	2014	748	1	Saturday workshops	Introducing secure coding in CS0, CS1, and CS2 (abstract only).	Blair Taylor; Siddharth Kaza; Elizabeth K. Hawthorne	https://doi.org/10.1145/2538862.2539018	FALSE
conf/sigcse/sigcse2014	SIGCSE	2014	748	1	Saturday workshops	Introduction to analysing the BlueJ blackbox data (abstract only).	Neil Christopher Charles Brown	https://doi.org/10.1145/2538862.2539012	FALSE
conf/sigcse/sigcse2014	SIGCSE	2014	730	1	Birds of a feather flock I	Introduction to programming for scientists and engineers (abstract only).	Peter H. Froehlich; Joanne F. Selinski	https://doi.org/10.1145/2538862.2544245	FALSE
conf/sigcse/sigcse2014	SIGCSE	2014	465-466	2	Special session	Introductory programming meets the real world: using real problems and data in CS1.	Ruth E. Anderson; Michael D. Ernst; Robert Ordóñez; Paul Pham; Steven A. Wolfman	https://doi.org/10.1145/2538862.2538994	FALSE
conf/sigcse/sigcse2014	SIGCSE	2014	730	1	Birds of a feather flock I	IT curricular guidance for associate-degree granting institutions (abstract only).	Elizabeth K. Hawthorne; Robert D. Campbell; Jim Nichols; Cara Tang; Cindy Tucker	https://doi.org/10.1145/2538862.2544247	FALSE
conf/sigcse/sigcse2014	SIGCSE	2014	739	1	Wednesday workshops	ITSEED: hands-on labs for IT security education (abstract only).	Yan Bai; Xinli Wang	https://doi.org/10.1145/2538862.2538997	FALSE
conf/sigcse/sigcse2014	SIGCSE	2014	712	1	Poster session I	Kodu alice and computer science unplugged: a model of effective introducing middle school students to computer science and computational thinking (abstract only).	Daniela Marghitu; Lavaris Thomas; Yasmeen Rawajfih; Jillian Hall; Andrew Marshall	https://doi.org/10.1145/2538862.2544300	FALSE
conf/sigcse/sigcse2014	SIGCSE	2014	43654	2	Keynote addresses	Lab of things: a devices research and teaching platform for home and beyond.	A. J. Bernheim Brush	https://doi.org/10.1145/2538862.2554794	FALSE
conf/sigcse/sigcse2014	SIGCSE	2014	748	1	Saturday workshops	Learn Java in N games (abstract only).	Peter Drake; Mark Goadrich	https://doi.org/10.1145/2538862.2539009	FALSE
conf/sigcse/sigcse2014	SIGCSE	2014	721-722	2	Poster session II	Looking glass: a C++ library for testing student programs through reflection (abstract only).	Scott Turner	https://doi.org/10.1145/2538862.2544299	FALSE
conf/sigcse/sigcse2014	SIGCSE	2014	371-372	2	Panel session	Looking outside: what can be learnt from computing education around the world?	Annemieke Craig; Catherine Lang; Michail N. Giannakos; Carsten Kleiner; Judith Gal-Ezer	https://doi.org/10.1145/2538862.2538871	FALSE
conf/sigcse/sigcse2014	SIGCSE	2014	739	1	Wednesday workshops	Making games and apps in introductory computer science (abstract only).	Tiffany Barnes; Veronica Cateté; Andrew Hicks; Barry W. Peddycord III	https://doi.org/10.1145/2538862.2539000	FALSE
conf/sigcse/sigcse2014	SIGCSE	2014	737	1	Birds of a feather flock II	Making induction meaningful, recursively (abstract only).	Peter-Michael Osera; Brent A. Yorgey	https://doi.org/10.1145/2538862.2544262	FALSE
conf/sigcse/sigcse2014	SIGCSE	2014	722	1	Poster session II	Making use of the cognitive apprenticeship framework in an undergraduate robotics course (abstract only).	D. Brian Larkins	https://doi.org/10.1145/2538862.2544309	FALSE
conf/sigcse/sigcse2014	SIGCSE	2014	719	1	Poster session II	Mission critical: building community to engage young women in computer science (abstract only).	Amanda Ochsner; Rane Johnson-Stempson; Matthew Berland	https://doi.org/10.1145/2538862.2544288	FALSE
conf/sigcse/sigcse2014	SIGCSE	2014	745	1	Friday Workshops	Mobile computational thinking with app inventor 2 (abstract only).	Franklyn A. Turbak; Fred G. Martin; Shaileen Crawford Pokress; Ralph Morelli; Mark Sherman; David Wolber	https://doi.org/10.1145/2538862.2539023	FALSE
conf/sigcse/sigcse2014	SIGCSE	2014	750	1	Saturday workshops	Mobile computer science principles: a professional development sampler for teachers (abstract only).	Ralph A. Morelli; David Wolber; Jennifer Rosato; Chinma Uche; Pauline Lake	https://doi.org/10.1145/2538862.2539030	FALSE
conf/sigcse/sigcse2014	SIGCSE	2014	711	1	Poster session I	Motivational active learning for computer science education (abstract only).	Johanna Pirker; Christian Gütl	https://doi.org/10.1145/2538862.2544285	FALSE
conf/sigcse/sigcse2014	SIGCSE	2014	714-715	2	Poster session I	MyCS: building a middle-years CS curriculum (abstract only).	Thomas Ashmore; Sorathan Chaturapruek; Zachary Dodds; Corinne Druhan; Bridgette Eichelberger; Michael Erlinger; Elizabeth Schofield	https://doi.org/10.1145/2538862.2544313	FALSE
conf/sigcse/sigcse2014	SIGCSE	2014	717	1	Poster session II	New hands-on labs on browser security (abstract only).	Wenliang Du; Li Yang; Joseph Migga Kizza; Xiaohong Yuan	https://doi.org/10.1145/2538862.2544266	FALSE
conf/sigcse/sigcse2014	SIGCSE	2014	621-622	2	Special session	Nifty assignments.	Nick Parlante; Julie Zelenski; Josh Hug; John Nicholson; John DeNero; Antti Laaksonen; Arto Vihavainen; Frank McCown; Kevin Wayne	https://doi.org/10.1145/2538862.2538995	FALSE
conf/sigcse/sigcse2014	SIGCSE	2014	728-729	2	Birds of a feather flock I	No news in database education by all accounts: seriously? (abstract only).	Carsten Kleiner	https://doi.org/10.1145/2538862.2544237	FALSE
conf/sigcse/sigcse2014	SIGCSE	2014	735	1	Birds of a feather flock II	NSF/IEEE-TCPP curriculum initiative on parallel and distributed computing: core topics for undergraduates (abstract only).	Sushil K. Prasad; Almadena Yu. Chtchelkanova; Anshul Gupta; Arnold L. Rosenberg; Alan Sussman	https://doi.org/10.1145/2538862.2544255	FALSE
conf/sigcse/sigcse2014	SIGCSE	2014	714	1	Poster session I	Observations of first learners with different capabilities (abstract only).	Amber Wagner; Jeff Gray	https://doi.org/10.1145/2538862.2544307	FALSE
conf/sigcse/sigcse2014	SIGCSE	2014	715	1	Poster session I	OCTAL: online course tool for adaptive learning (abstract only).	Daniel Armendariz; Zachary MacHardy; Daniel D. Garcia	https://doi.org/10.1145/2538862.2544318	FALSE
conf/sigcse/sigcse2014	SIGCSE	2014	271-272	2	Panel session	Panel of computing students with disabilities.	Richard E. Ladner; Jillian Hall; Samir Jain; CeAhna Lathon; Vincent Martin	https://doi.org/10.1145/2538862.2538867	FALSE
conf/sigcse/sigcse2014	SIGCSE	2014	722	1	Poster session II	Parallel programming paradigms illustrated (abstract only).	David P. Bunde; Michael Graf; Deyu Han; Jens Mache	https://doi.org/10.1145/2538862.2544304	FALSE
conf/sigcse/sigcse2014	SIGCSE	2014	731	1	Birds of a feather flock I	Preparing computer science students for a sustainable future (abstract only).	Daniela Inclezan	https://doi.org/10.1145/2538862.2544251	FALSE
conf/sigcse/sigcse2014	SIGCSE	2014	727	1	Birds of a feather flock I	Privacy between technological capabilities and society's expectations (abstract only).	Ernst L. Leiss; Lila Ghemri	https://doi.org/10.1145/2538862.2544231	FALSE
conf/sigcse/sigcse2014	SIGCSE	2014	748-749	2	Saturday workshops	Projects for computing summer camps for 4th-12th grade students (abstract only).	Barbara J. Ericson; Christopher Michaud; Xin Xu; Krishnendu Roy	https://doi.org/10.1145/2538862.2539021	FALSE
conf/sigcse/sigcse2014	SIGCSE	2014	727	1	Birds of a feather flock I	Promoting professional responsibility and ethics: the pledge of the computing professional (abstract only).	John K. Estell; Ken Christensen	https://doi.org/10.1145/2538862.2544229	FALSE
conf/sigcse/sigcse2014	SIGCSE	2014	749	1	Saturday workshops	Puzzle-based learning: introducing creative thinking and problem solving for computer science and engineering (abstract only).	Raja Sooriamurthi; Nickolas J. G. Falkner; Ed Meyer; Zbigniew Michalewicz	https://doi.org/10.1145/2538862.2539025	FALSE
conf/sigcse/sigcse2014	SIGCSE	2014	723	1	Poster session II	PVA (privacy through visual anonymity) lab for enhancing CS education and outreach (abstract only).	Ankur Chattopadhyay; Thomas Nehring	https://doi.org/10.1145/2538862.2544314	FALSE
conf/sigcse/sigcse2014	SIGCSE	2014	597-602	6	What we say, what they do	A formative study of influences on student testing behaviors.	Kevin Buffardi; Stephen H. Edwards	https://doi.org/10.1145/2538862.2538982	TRUE
conf/sigcse/sigcse2014	SIGCSE	2014	427-432	6	Recruitment and retention of underrepresented groups	A journey toward obtaining our first NSF S-STEM (scholarship) grant.	An-I Andy Wang; Gary S. Tyson; David B. Whalley; Robert van Engelen; Zhenghao Zhang	https://doi.org/10.1145/2538862.2538884	TRUE
conf/sigcse/sigcse2014	SIGCSE	2014	541-542	2	Panel session	Recruit and retain women in undergraduate computing: success stories using research-based practices.	Leisa D. Thompson; Crystal Eney; Ruth Davis; Tiffany Grady	https://doi.org/10.1145/2538862.2538865	FALSE
conf/sigcse/sigcse2014	SIGCSE	2014	273-274	2	Panel session	Rediscovering the passion, beauty, joy, and awe: making computing fun again, part 7.	Daniel D. Garcia; Jennifer Campbell; Rebecca Dovi; Cay Horstmann	https://doi.org/10.1145/2538862.2538874	FALSE
conf/sigcse/sigcse2014	SIGCSE	2014	725	1	Poster session II	Remote pair programming (RPP) in massively open online courses (MOOCs) (abstract only).	Jonathan McKinsey; Samuel Joseph; Armando Fox; Daniel D. Garcia	https://doi.org/10.1145/2538862.2544320	FALSE
conf/sigcse/sigcse2014	SIGCSE	2014	265-270	6	Projects and capstone courses	A service learning practicum capstone.	Aaron Bloomfield; Mark Sherriff; Kara Williams	https://doi.org/10.1145/2538862.2538974	TRUE
conf/sigcse/sigcse2014	SIGCSE	2014	725	1	Poster session II	Resources for teaching web science to computer science undergraduates (abstract only).	Frank McCown; Michael L. Nelson	https://doi.org/10.1145/2538862.2554792	FALSE
conf/sigcse/sigcse2014	SIGCSE	2014	739	1	Wednesday workshops	Reviewing NSF proposals: learn about effective proposal writing via the review process (abstract only).	Valerie Barr; Paul Tymann	https://doi.org/10.1145/2538862.2539003	FALSE
conf/sigcse/sigcse2014	SIGCSE	2014	713	1	Poster session I	Revitalizing the computer science undergraduate curriculum inside and outside of the classroom using mobile computing platforms (abstract only).	Shiva Azadegan; Josh Dehlinger; Siddharth Kaza	https://doi.org/10.1145/2538862.2544302	FALSE
conf/sigcse/sigcse2014	SIGCSE	2014	722	1	Poster session II	RIT's new minor in free and open source software and free culture (abstract only).	Stephen Jacobs; Amit Ray; Jonathan Schull	https://doi.org/10.1145/2538862.2544306	FALSE
conf/sigcse/sigcse2014	SIGCSE	2014	741	1	Wednesday workshops	Scala for introductory CS and parallelism(abstract only).	Mark C. Lewis; Konstantin Läufer; George K. Thiruvathukal	https://doi.org/10.1145/2538862.2539027	FALSE
conf/sigcse/sigcse2014	SIGCSE	2014	720	1	Poster session II	Scare and prepare: increasing awareness, safety, and passion for cyber-security (abstract only).	Premchand Uppuluri; Jeff Pittges; Joseph Chase	https://doi.org/10.1145/2538862.2544294	FALSE
conf/sigcse/sigcse2014	SIGCSE	2014	433-438	6	Recruitment and retention of underrepresented groups	A support program for introductory CS courses that improves student performance and retains students from underrepresented groups.	Tia Newhall; Lisa Meeden; Andrew Danner; Ameet Soni; Frances Ruiz; Richard Wicentowski	https://doi.org/10.1145/2538862.2538923	TRUE
conf/sigcse/sigcse2014	SIGCSE	2014	744	1	Friday Workshops	Scratch + Xbox Kinect: a magical combination for outreach (abstract only).	Victor T. Norman	https://doi.org/10.1145/2538862.2539008	FALSE
conf/sigcse/sigcse2014	SIGCSE	2014	555-560	6	Operating systems and programming languages	A virtual graphics card for teaching device driver design.	Christopher Corsi; Robert Geist; Dennis Lingerfelt	https://doi.org/10.1145/2538862.2538895	TRUE
conf/sigcse/sigcse2014	SIGCSE	2014	747	1	Saturday workshops	Server-side web development with JavaScript and Node.js (abstract only).	Ariel Ortiz	https://doi.org/10.1145/2538862.2539001	FALSE
conf/sigcse/sigcse2014	SIGCSE	2014	121-126	6	Active learning	Active learning during lecture using tablets.	Barry L. Kurtz; James B. Fenwick Jr.; Rahman Tashakkori; Ahmad Esmaili; Stephen R. Tate	https://doi.org/10.1145/2538862.2538907	TRUE
conf/sigcse/sigcse2014	SIGCSE	2014	43528	2	Keynote addresses	SIGCSE plus you equals leverage.	Andrea W. Lawrence	https://doi.org/10.1145/2538862.2554796	FALSE
conf/sigcse/sigcse2014	SIGCSE	2014	15-20	6	Automated assessment	Adaptively identifying non-terminating code when testing student programs.	Stephen H. Edwards; Zalia Shams; Craig Estep	https://doi.org/10.1145/2538862.2538926	TRUE
conf/sigcse/sigcse2014	SIGCSE	2014	749	1	Saturday workshops	Snap! (build your own blocks) (abstract only).	Brian Harvey; Daniel D. Garcia; Tiffany Barnes; Nathaniel Titterton; Omoju Miller; Daniel Armendariz; Jon McKinsey; Zachary MacHardy; Eugene Lemon; Sean Morris; Josh Paley	https://doi.org/10.1145/2538862.2539022	FALSE
conf/sigcse/sigcse2014	SIGCSE	2014	259-264	6	Projects and capstone courses	Adding unit test experience to a usability centered project course.	Christopher Brown; Robert Pastel; Marika Seigel; Charles Wallace; Linda Ott	https://doi.org/10.1145/2538862.2538964	TRUE
conf/sigcse/sigcse2014	SIGCSE	2014	211-216	6	Design: courses and curricula	An ACM 2013 exemplar course integrating fundamentals, languages, and software engineering.	Jason O. Hallstrom; Cathy Hochrine; Jacob Sorber; Murali Sitaraman	https://doi.org/10.1145/2538862.2538969	TRUE
conf/sigcse/sigcse2014	SIGCSE	2014	253-258	6	Projects and capstone courses	An assessment model for large project courses.	Maria Vasilevskaya; David Broman; Kristian Sandahl	https://doi.org/10.1145/2538862.2538947	TRUE
conf/sigcse/sigcse2014	SIGSCE	2014	625-626	2	Special session	Special session: "hands-on" tutorial: teaching software correctness with RESOLVE.	Murali Sitaraman; Bruce W. Weide	https://doi.org/10.1145/2538862.2538987	FALSE
conf/sigcse/sigcse2014	SIGSCE	2014	179-180	2	Special session	Special session: engaging mathematical reasoning exercises.	Joseph E. Hollingsworth; Murali Sitaraman	https://doi.org/10.1145/2538862.2538989	FALSE
conf/sigcse/sigcse2014	SIGCSE	2014	671-676	6	MOOCs	An environment for learning interactive programming.	Terry Tang; Scott Rixner; Joe Warren	https://doi.org/10.1145/2538862.2538908	TRUE
conf/sigcse/sigcse2014	SIGSCE	2014	733	1	Birds of a feather flock II	State-level advocacy for computing education reform (abstract only).	W. Richards Adrion	https://doi.org/10.1145/2538862.2544239	FALSE
conf/sigcse/sigcse2014	SIGCSE	2014	27-32	6	Gamification	An experience report on using gamification in technical higher education.	Alexandru Iosup; Dick H. J. Epema	https://doi.org/10.1145/2538862.2538899	TRUE
conf/sigcse/sigcse2014	SIGCSE	2014	145-150	6	Big data	An undergraduate degree in data science: curriculum and a decade of implementation experience.	Paul E. Anderson; James F. Bowring; Renée McCauley; George Pothering; Christopher W. Starr	https://doi.org/10.1145/2538862.2538936	TRUE
conf/sigcse/sigcse2014	SIGSCE	2014	723	1	Poster session II	Studio K: a game development environment designed for gains in computational thinking (abstract only).	Gabriella Anton; Matthew Berland	https://doi.org/10.1145/2538862.2544312	FALSE
conf/sigcse/sigcse2014	SIGSCE	2014	709-710	2	Poster session I	Supporting computational algorithmic thinking (SCAT): development of a complex cognitive capability in african-american middle-school girls (abstract only).	Jakita O. Thomas	https://doi.org/10.1145/2538862.2544279	FALSE
conf/sigcse/sigcse2014	SIGSCE	2014	735	1	Birds of a feather flock II	Survey courses and AP CS principles (abstract only).	Chris Mayfield; Dennis Brylow	https://doi.org/10.1145/2538862.2544253	FALSE
conf/sigcse/sigcse2014	SIGCSE	2014	223-228	6	Collecting and analyzing student data I	Blackbox: a large scale repository of novice programmers' activity.	Neil Christopher Charles Brown; Michael Kölling; David McCall; Ian Utting	https://doi.org/10.1145/2538862.2538924	TRUE
conf/sigcse/sigcse2014	SIGSCE	2014	741	1	Wednesday workshops	Teach algorithm design and intractability with a project-based curriculum centered on a single intractable problem: three domains to choose from (abstract only).	Andrea F. Lobo; Ganesh Baliga	https://doi.org/10.1145/2538862.2539031	FALSE
conf/sigcse/sigcse2014	SIGSCE	2014	709	1	Poster session I	Teaching artificial intelligence as a lab science: basic and informed search (abstract only).	Stephanie E. August; Michael A. Fraser; Miguel A. Vazquez	https://doi.org/10.1145/2538862.2544273	FALSE
conf/sigcse/sigcse2014	SIGCSE	2014	205-210	6	Design: courses and curricula	Bringing business intelligence to healthcare informatics curriculum: a preliminary investigation.	Guangzhi Zheng; Chi Zhang; Lei Li	https://doi.org/10.1145/2538862.2538935	TRUE
conf/sigcse/sigcse2014	SIGSCE	2014	740	1	Wednesday workshops	Teaching computing with the IPython notebook (abstract only).	Greg Wilson; Fernando Perez; Peter Norvig	https://doi.org/10.1145/2538862.2539011	FALSE
conf/sigcse/sigcse2014	SIGCSE	2014	331-336	6	Focus on K-12: middle school	Camp CyberGirls: using a virtual world to introduce computing concepts to middle school girls.	Caitlin Hulsey; Toni Bloodworth Pence; Larry F. Hodges	https://doi.org/10.1145/2538862.2538881	TRUE
conf/sigcse/sigcse2014	SIGCSE	2014	21-26	6	Automated assessment	Can computers compare student code solutions as well as teachers?	Matheus Gaudencio; Ayla Dantas; Dalton Dario Serey Guerrero	https://doi.org/10.1145/2538862.2538973	TRUE
conf/sigcse/sigcse2014	SIGSCE	2014	721	1	Poster session II	Teaching mobile app software development is a challenge! (abstract only).	Roy P. Pargas; Punit Kulkarni; Greg Edison; Barbara J. Speziale	https://doi.org/10.1145/2538862.2544297	FALSE
conf/sigcse/sigcse2014	SIGSCE	2014	734	1	Birds of a feather flock II	Teaching open source (software) (abstract only).	Karl Wurst; Lori Postner; Stoney Jackson	https://doi.org/10.1145/2538862.2544248	FALSE
conf/sigcse/sigcse2014	SIGSCE	2014	547-548	2	Panel session	Teaching parallel design patterns to undergraduates in computer science.	Richard A. Brown; Joel C. Adams; Clayton Ferner; Elizabeth Shoop; Anthony Barry Wilkinson	https://doi.org/10.1145/2538862.2538875	FALSE
conf/sigcse/sigcse2014	SIGSCE	2014	736	1	Birds of a feather flock II	Teaching security using hands-on exercises (abstract only).	Richard S. Weiss; Michael E. Locasto; Jens Mache; Elizabeth K. Hawthorne; Justin Cappos	https://doi.org/10.1145/2538862.2544257	FALSE
conf/sigcse/sigcse2014	SIGSCE	2014	740	1	Wednesday workshops	Teaching service-oriented programming to CS and SE undergraduate students (abstract only).	Xumin Liu; Rajendra K. Raj; Thomas Reichlmayr; Alex Pantaleev; Chunmei Liu	https://doi.org/10.1145/2538862.2539013	FALSE
conf/sigcse/sigcse2014	SIGSCE	2014	743	1	Friday Workshops	Teaching shared memory parallel concepts with OpenMP (abstract only).	Joel C. Adams; Richard A. Brown; Elizabeth Shoop	https://doi.org/10.1145/2538862.2538999	FALSE
conf/sigcse/sigcse2014	SIGCSE	2014	653-658	6	Focus on K-12: outreach and computational thinking	Challenging stereotypes and changing attitudes: the effect of a brief programming encounter on adults' attitudes toward programming.	Polina Charters; Michael J. Lee; Andrew J. Ko; Dastyni Loksa	https://doi.org/10.1145/2538862.2538938	TRUE
conf/sigcse/sigcse2014	SIGSCE	2014	463-464	2	Panel session	Teaching tips we wish they'd told us before we started: high school edition.	Daniel D. Garcia; Baker Franke; Stephanie Hoeppner; Josh Paley	https://doi.org/10.1145/2538862.2538870	FALSE
conf/sigcse/sigcse2014	SIGSCE	2014	728	1	Birds of a feather flock I	Teaching track faculty in CS (abstract only).	Mark Sherriff; Daniel D. Garcia; Jody Paul	https://doi.org/10.1145/2538862.2544235	FALSE
conf/sigcse/sigcse2014	SIGSCE	2014	744-745	2	Friday Workshops	Teaching with HFOSS to provide students with real world experience: an introduction (abstract only).	Darci Burdge; Lori Postner; Becka Morgan; Heidi J. C. Ellis; Stoney Jackson; Gregory W. Hislop; Michelle Purcell	https://doi.org/10.1145/2538862.2539017	FALSE
conf/sigcse/sigcse2014	SIGCSE	2014	517-522	6	Focus on K-12: before middle school	Code club: bringing programming to UK primary schools through scratch.	Neil Smith; Clare Sutcliffe; Linda Sandvik	https://doi.org/10.1145/2538862.2538919	TRUE
conf/sigcse/sigcse2014	SIGSCE	2014	708	1	Poster session I	Techniques for retaining low performing students: high-need student mentoring program (abstract only).	Shearon Brown; Xiaohong Yuan	https://doi.org/10.1145/2538862.2544271	FALSE
conf/sigcse/sigcse2014	SIGSCE	2014	736	1	Birds of a feather flock II	Technology that educators of computing hail (TECH): come, share your favorites! (abstract only).	Daniel D. Garcia; Daniel Armendariz	https://doi.org/10.1145/2538862.2544259	FALSE
conf/sigcse/sigcse2014	SIGCSE	2014	355-360	6	Soft skills: industry perspectives	Comparing educational experiences and on-the-job needs of educational software designers.	Marisa Exter	https://doi.org/10.1145/2538862.2538970	TRUE
conf/sigcse/sigcse2014	SIGSCE	2014	744	1	Friday Workshops	The absolute beginner's guide to JUnit in the classroom (abstract only).	Stephen H. Edwards; Manuel A. Pérez-Quiñones	https://doi.org/10.1145/2538862.2539015	FALSE
conf/sigcse/sigcse2014	SIGCSE	2014	451-456	6	Interdisciplinary courses and curricula	Computing in the arts: a model curriculum.	Bill Z. Manaris; Renée McCauley; Marian Mazzone; William H. Bares	https://doi.org/10.1145/2538862.2538942	TRUE
conf/sigcse/sigcse2014	SIGSCE	2014	711	1	Poster session I	The impact of math preparedness on introductory programming (CS1) success (abstract only).	Emmett Tomai; Christine F. Reilly	https://doi.org/10.1145/2538862.2544292	FALSE
conf/sigcse/sigcse2014	SIGCSE	2014	415-420	6	Web-based instruction	CrowdGrader: a tool for crowdsourcing the evaluation of homework assignments.	Luca de Alfaro; Michael Shavlovsky	https://doi.org/10.1145/2538862.2538900	TRUE
conf/sigcse/sigcse2014	SIGCSE	2014	151-156	6	Big data	CS principles goes to middle school: learning how to teach "Big Data".	Philip Sheridan Buffum; Allison G. Martínez-Arocho; Megan Hardy Frankosky; Fernando J. Rodríguez; Eric N. Wiebe; Kristy Elizabeth Boyer	https://doi.org/10.1145/2538862.2538949	TRUE
conf/sigcse/sigcse2014	SIGCSE	2014	493-498	6	Focus on K-12: informal education, curriculum, and robots	Curriculum is not enough: the educational theory and research foundation of the exploring computer science professional development model.	Joanna Goode; Jane Margolis; Gail Chapman	https://doi.org/10.1145/2538862.2538948	TRUE
conf/sigcse/sigcse2014	SIGSCE	2014	721	1	Poster session II	The relationship between task difficulty and emotion in online computer programming tutoring (abstract only).	Joseph B. Wiggins; Joseph F. Grafsgaard; Kristy Elizabeth Boyer; Eric N. Wiebe; James C. Lester	https://doi.org/10.1145/2538862.2544298	FALSE
conf/sigcse/sigcse2014	SIGSCE	2014	717-718	2	Poster session II	The rising renaissance engineer spectrum awards (abstract only).	Martha J. Kosa; Ambareen Siraj	https://doi.org/10.1145/2538862.2544276	FALSE
conf/sigcse/sigcse2014	SIGCSE	2014	91-96	6	Engaging students through artistic expression	Dancing alice: exploring embodied pedagogical strategies for learning computational thinking.	Shaundra Bryant Daily; Alison E. Leonard; Sophie Jörg; Sabarish V. Babu; Kara Gundersen	https://doi.org/10.1145/2538862.2538917	TRUE
conf/sigcse/sigcse2014	SIGCSE	2014	629-634	6	Tools	Defining and evaluating conflictive animations for programming education: the case of jeliot ConAn.	Andrés Moreno; Erkki Sutinen; Mike Joy	https://doi.org/10.1145/2538862.2538888	TRUE
conf/sigcse/sigcse2014	SIGCSE	2014	103-108	6	Research: concept inventories & neo-piagetian theory	Developing a pre- and post-course concept inventory to gauge operating systems learning.	Kevin C. Webb; Cynthia Taylor	https://doi.org/10.1145/2538862.2538886	TRUE
conf/sigcse/sigcse2014	SIGSCE	2014	729	1	Birds of a feather flock I	Toolmaker or scientist? (abstract only).	Brian Patterson; William E. J. Doane	https://doi.org/10.1145/2538862.2544241	FALSE
conf/sigcse/sigcse2014	SIGCSE	2014	579-584	6	Soft skills: academic perspectives	Developing CS/SE students' communication abilities through a program-wide framework.	Janet E. Burge; Gerald C. Gannod; Mike Carter; Alanna Howard; Brian Schultz; Mladen A. Vouk; David Wright; Paul V. Anderson	https://doi.org/10.1145/2538862.2538984	TRUE
conf/sigcse/sigcse2014	SIGSCE	2014	81-82	2	Special session	Toward curricular guidelines for cybersecurity.	Andrew D. McGettrick; Lillian N. Cassel; Melissa Dark; Elizabeth K. Hawthorne; John Impagliazzo	https://doi.org/10.1145/2538862.2538990	FALSE
conf/sigcse/sigcse2014	SIGSCE	2014	710	1	Poster session I	Towards engaging big data for CS1/2 (abstract only).	Nadeem Abdul Hamid; Steven Benzel	https://doi.org/10.1145/2538862.2544280	FALSE
conf/sigcse/sigcse2014	SIGSCE	2014	43591	2	Keynote addresses	Transforming US education with computer science.	Hadi Partovi	https://doi.org/10.1145/2538862.2554793	FALSE
conf/sigcse/sigcse2014	SIGSCE	2014	627-628	2	Special session	Tutorial: team projects with Alice 3.	Wanda Dann; Dennis Cosgrove; Don Slater; Dave Culyba	https://doi.org/10.1145/2538862.2538993	FALSE
conf/sigcse/sigcse2014	SIGCSE	2014	609-614	6	Extending frameworks	Dynamic program visualizations: an experience report.	James H. Cross; T. Dean Hendrix; Larry A. Barowski; David A. Umphress	https://doi.org/10.1145/2538862.2538958	TRUE
conf/sigcse/sigcse2014	SIGCSE	2014	457-462	6	Interdisciplinary courses and curricula	E pluribus, plurima: the synergy of interdisciplinary class groups.	Debra S. Goldberg; Elizabeth K. White	https://doi.org/10.1145/2538862.2538979	TRUE
conf/sigcse/sigcse2014	SIGCSE	2014	133-138	6	Active learning	Effectiveness of a computational thinking (CS0) course on student analytical skills.	Michele Van Dyne; Jeffrey Braun	https://doi.org/10.1145/2538862.2538956	TRUE
conf/sigcse/sigcse2014	SIGSCE	2014	83-84	2	Special session	Understanding NSF funding.	Jan Cuny; Jeffrey Forbes; Harriet G. Taylor; Valerie Barr; Victor Piotrowski; Jane Prey; Paul Tymann	https://doi.org/10.1145/2538862.2538988	FALSE
conf/sigcse/sigcse2014	SIGCSE	2014	85-90	6	Engaging students through artistic expression	Engaging underrepresented groups in high school introductory computing through computational remixing with EarSketch.	Jason Freeman; Brian Magerko; Tom McKlin; Mike Reilly; Justin Permar; Cameron Summers; Eric Fruchter	https://doi.org/10.1145/2538862.2538906	TRUE
conf/sigcse/sigcse2014	SIGSCE	2014	717	1	Poster session II	Use of mobile application to improve active learning and student participation in the computer science classroom (abstract only).	Debzani Deb; Mohammad Muztaba Fuad	https://doi.org/10.1145/2538862.2544291	FALSE
conf/sigcse/sigcse2014	SIGSCE	2014	710-711	2	Poster session I	Use of problem-solving approach to teach scratch programming for adult novice programmers (abstract only).	Chiung-Fang Chiu	https://doi.org/10.1145/2538862.2544284	FALSE
conf/sigcse/sigcse2014	SIGCSE	2014	241-246	6	Tactile computing	Ethnocomputing with electronic textiles: culturally responsive open design to broaden participation in computing in American indian youth and communities.	Yasmin B. Kafai; Kristin A. Searle; Cristóbal Martinez; Bryan Brayboy	https://doi.org/10.1145/2538862.2538903	TRUE
conf/sigcse/sigcse2014	SIGCSE	2014	307-312	6	Assessment and evaluation	Evaluating an inverted CS1.	Jennifer Campbell; Diane Horton; Michelle Craig; Paul Gries	https://doi.org/10.1145/2538862.2538943	TRUE
conf/sigcse/sigcse2014	SIGSCE	2014	737	1	Birds of a feather flock II	Using and sharing programming exercises to improve introductory courses (abstract only).	David Hovemeyer; Jaime Spacco; Robert C. Duvall; Stephen H. Edwards; Amruth N. Kumar; Andrew Petersen; Daniel Zingaro	https://doi.org/10.1145/2538862.2544261	FALSE
conf/sigcse/sigcse2014	SIGCSE	2014	403-408	6	Software engineering: courses	Evaluating GameDevTycoon for teaching software engineering.	Claudia Szabo	https://doi.org/10.1145/2538862.2538971	TRUE
conf/sigcse/sigcse2014	SIGCSE	2014	361-366	6	Soft skills: industry perspectives	Evaluating industry-inspired pair programming communication guidelines with undergraduate students.	Mark Zarb; Janet Hughes; John Richards	https://doi.org/10.1145/2538862.2538980	TRUE
conf/sigcse/sigcse2014	SIGSCE	2014	736-737	2	Birds of a feather flock II	Using science fiction in CS courses (abstract only).	Rebecca Bates; Judy Goldsmith; Valerie Summet; Nanette Veilleux	https://doi.org/10.1145/2538862.2544260	FALSE
conf/sigcse/sigcse2014	SIGSCE	2014	747	1	Saturday workshops	Using the AP CS labs in the classroom (abstract only).	Robert Glen Martin; Paul T. Tymann; Lester L. Wainwright	https://doi.org/10.1145/2538862.2539006	FALSE
conf/sigcse/sigcse2014	SIGSCE	2014	729	1	Birds of a feather flock I	Using the cloud to replace traditional physical networking laboratories (abstract only).	Magdy Ellabidy; John P. Russo	https://doi.org/10.1145/2538862.2544243	FALSE
conf/sigcse/sigcse2014	SIGSCE	2014	745-746	2	Friday Workshops	Using the new lego MindStorms EV3 robotics platform in CS courses (abstract only).	Frank Klassner; Benjamin Schafer	https://doi.org/10.1145/2538862.2539024	FALSE
conf/sigcse/sigcse2014	SIGSCE	2014	718	1	Poster session II	Utilizing gamification with social network to aid students in programming languages lessons in higher education IT courses (abstract only).	Marcell Amorim Almeida Mesquita; Armando Maciel Toda; Jacques Duilio Brancher; Ricardo Melo Casseb do Carmo	https://doi.org/10.1145/2538862.2544282	FALSE
conf/sigcse/sigcse2014	SIGCSE	2014	591-596	6	What we say, what they do	explain in plain english' questions revisited: data structures problems.	Malcolm Corney; Sue Fitzgerald; Brian Hanks; Raymond Lister; Renée A. McCauley; Laurie Murphy	https://doi.org/10.1145/2538862.2538911	TRUE
conf/sigcse/sigcse2014	SIGSCE	2014	737	1	Birds of a feather flock II	Web programming (abstract only).	Martin Stepp; Jessica Miller	https://doi.org/10.1145/2538862.2544263	FALSE
conf/sigcse/sigcse2014	SIGSCE	2014	728	1	Birds of a feather flock I	What analogies/metaphors/similes do you use when teaching CS concepts? (abstract only).	William John Pulling	https://doi.org/10.1145/2538862.2544234	FALSE
conf/sigcse/sigcse2014	SIGCSE	2014	665-670	6	MOOCs	Facilitating human interaction in an online programming course.	Joe Warren; Scott Rixner; John Greiner; Stephen Wong	https://doi.org/10.1145/2538862.2538893	TRUE
conf/sigcse/sigcse2014	SIGSCE	2014	712-713	2	Poster session I	Who drops CS1? (abstract only).	Diane Horton; Michelle Craig	https://doi.org/10.1145/2538862.2544301	FALSE
conf/sigcse/sigcse2014	SIGCSE	2014	647-652	6	Focus on K-12: outreach and computational thinking	Five years of game programming outreach: understanding student differences.	Antti-Jussi Lakanen; Ville Isomöttönen; Vesa Lappalainen	https://doi.org/10.1145/2538862.2538914	TRUE
conf/sigcse/sigcse2014	SIGCSE	2014	319-324	6	Classroom management	Framing classroom climate for student learning and retention in computer science.	Lecia J. Barker; Melissa O'Neill; Nida Kazim	https://doi.org/10.1145/2538862.2538959	TRUE	Focus op classroom climate
conf/sigcse/sigcse2014	SIGCSE	2014	235-240	6	Tactile computing	Hands-on introduction to computer science at the freshman level.	Raghuraman Balasubramanian; Zachary York; Matthew Doran; Aritra Biswas; Timur Girgin; Karthikeyan Sankaralingam	https://doi.org/10.1145/2538862.2538889	TRUE
conf/sigcse/sigcse2014	SIGCSE	2014	529-534	6	Security among the cloud	Harnessing the cloud for teaching cybersecurity.	Khaled Salah	https://doi.org/10.1145/2538862.2538880	TRUE
conf/sigcse/sigcse2014	SIGCSE	2014	33-38	6	Gamification	How (not) to introduce badges to online exercises.	Lassi Haaranen; Petri Ihantola; Lasse Hakulinen; Ari Korhonen	https://doi.org/10.1145/2538862.2538921	TRUE
conf/sigcse/sigcse2014	SIGCSE	2014	695-700	6	Collecting and analyzing student data II	Identifying challenging CS1 concepts in a large problem dataset.	Yuliya Cherenkova; Daniel Zingaro; Andrew Petersen	https://doi.org/10.1145/2538862.2538966	TRUE
conf/sigcse/sigcse2014	SIGCSE	2014	511-516	6	Focus on K-12: before middle school	Identifying elementary students' pre-instructional ability to develop algorithms and step-by-step instructions.	Hilary A. Dwyer; Charlotte Hill; Stacey Carpenter; Danielle Harlow; Diana Franklin	https://doi.org/10.1145/2538862.2538905	TRUE
conf/sigcse/sigcse2014	SIGCSE	2014	295-300	6	Assessment and evaluation	Importance of early performance in CS1: two conflicting assessment stories.	Leo Porter; Daniel Zingaro	https://doi.org/10.1145/2538862.2538912	TRUE
conf/sigcse/sigcse2014	SIGCSE	2014	391-396	6	Software engineering: courses	Improving software engineering education through an empirical approach: lessons learned from capstone teaching experiences.	Andrés Neyem; José I. Benedetto; Andres F. Chacon	https://doi.org/10.1145/2538862.2538920	TRUE
conf/sigcse/sigcse2014	SIGCSE	2014	43722	6	Automated assessment	Increasing the effectiveness of automated assessment by increasing marking granularity and feedback units.	Nickolas J. G. Falkner; Rebecca Vivian; David Piper; Katrina Falkner	https://doi.org/10.1145/2538862.2538896	TRUE
conf/sigcse/sigcse2014	SIGCSE	2014	277-282	6	CS2	Injecting parallel computing into CS2.	Joel C. Adams	https://doi.org/10.1145/2538862.2538883	TRUE
conf/sigcse/sigcse2014	SIGCSE	2014	139-144	6	Big data	Integrating big data into the computing curricula.	Yasin N. Silva; Suzanne W. Dietrich; Jason M. Reed; Lisa M. Tsosie	https://doi.org/10.1145/2538862.2538877	TRUE
conf/sigcse/sigcse2014	SIGCSE	2014	475-480	6	Research: predictors, creative thinking, co-linking courses	Integrating computational and creative thinking to improve learning and performance in CS1.	Lee Dee Miller; Leen-Kiat Soh; Vlad Chiriacescu; Elizabeth Ingraham; Duane F. Shell; Melissa Patterson Hazley	https://doi.org/10.1145/2538862.2538940	TRUE
conf/sigcse/sigcse2014	SIGCSE	2014	445-450	6	Interdisciplinary courses and curricula	Interdisciplinary computing classes: worth the effort.	Lori Carter	https://doi.org/10.1145/2538862.2538882	TRUE
conf/sigcse/sigcse2014	SIGCSE	2014	683-688	6	Collecting and analyzing student data II	Introducing undergraduate database students to K-12 education research.	Chris Mayfield; Carole Ottenheimer; Bethann Canada; Brooke Bell	https://doi.org/10.1145/2538862.2538957	TRUE
conf/sigcse/sigcse2014	SIGCSE	2014	39-44	6	Gamification	Khan academy gamifies computer science.	Briana B. Morrison; Betsy James DiSalvo	https://doi.org/10.1145/2538862.2538946	TRUE
conf/sigcse/sigcse2014	SIGCSE	2014	73-78	6	Mathematical perspectives	Learning relational algebra by snapping blocks.	Jason Gorman; Sebastian Gsell; Chris Mayfield	https://doi.org/10.1145/2538862.2538961	TRUE
conf/sigcse/sigcse2014	SIGCSE	2014	157-162	6	Games	Lessons learned and recommended strategies for game development components in a computer literacy course.	Robert Don Collier; Jalal Kawash	https://doi.org/10.1145/2538862.2538887	TRUE
conf/sigcse/sigcse2014	SIGCSE	2014	169-174	6	Games	Making games a "snap" with Stencyl: a summer computing workshop for K-12 teachers.	Jiangjiang Liu; Cheng-Hsien Lin; Joshua Wilson; David Hemmenway; Ethan Philip Hasson; Zebulun David Barnett; Yingbo Xu	https://doi.org/10.1145/2538862.2538978	TRUE
conf/sigcse/sigcse2014	SIGCSE	2014	217-222	6	Collecting and analyzing student data I	Measuring demographics and performance in computer science education at a nationwide scale using AP CS data.	Barbara Ericson; Mark Guzdial	https://doi.org/10.1145/2538862.2538918	TRUE
conf/sigcse/sigcse2014	SIGCSE	2014	585-590	6	What we say, what they do	Metaphors we teach by.	Joseph P. Sanford; Aaron Tietz; Saad Farooq; Samuel Z. Guyer; R. Benjamin Shapiro	https://doi.org/10.1145/2538862.2538945	TRUE
conf/sigcse/sigcse2014	SIGCSE	2014	109-114	6	Research: concept inventories & neo-piagetian theory	Misconceptions and concept inventory questions for binary search trees and hash tables.	Kuba Karpierz; Steven A. Wolfman	https://doi.org/10.1145/2538862.2538902	TRUE
conf/sigcse/sigcse2014	SIGCSE	2014	325-330	6	Classroom management	Multiple case study of nerd identity in a CS1 class.	Don G. Davis; Timothy T. Yuen; Matthew Berland	https://doi.org/10.1145/2538862.2538960	TRUE
conf/sigcse/sigcse2014	SIGCSE	2014	337-342	6	Focus on K-12: middle school	MyCS: CS for middle-years students and their teachers.	Elizabeth Schofield; Michael Erlinger; Zachary Dodds	https://doi.org/10.1145/2538862.2538901	TRUE
conf/sigcse/sigcse2014	SIGCSE	2014	115-120	6	Research: concept inventories & neo-piagetian theory	Neo-piagetian theory as a guide to curriculum analysis.	Claudia Szabo; Katrina Falkner	https://doi.org/10.1145/2538862.2538910	TRUE
conf/sigcse/sigcse2014	SIGCSE	2014	379-384	6	Peer instruction	New CS1 pedagogies and curriculum, the same success factors?	Christine Alvarado; Cynthia Bailey Lee; Gary Gillespie	https://doi.org/10.1145/2538862.2538897	TRUE
conf/sigcse/sigcse2014	SIGCSE	2014	469-474	6	Research: predictors, creative thinking, co-linking courses	No tests required: comparing traditional and dynamic predictors of programming success.	Christopher Watson; Frederick W. B. Li; Jamie L. Godwin	https://doi.org/10.1145/2538862.2538930	TRUE
conf/sigcse/sigcse2014	SIGCSE	2014	283-288	6	CS2	On the efficacy of board game strategy development as a first-year CS project.	Ivona Bezáková; James E. Heliotis; Sean Strout	https://doi.org/10.1145/2538862.2538904	TRUE
conf/sigcse/sigcse2014	SIGCSE	2014	409-414	6	Web-based instruction	Online discussions: improving education in CS?	Radu Paul Mihail; Beth Rubin; Judy Goldsmith	https://doi.org/10.1145/2538862.2538898	TRUE
conf/sigcse/sigcse2014	SIGCSE	2014	615-620	6	Extending frameworks	Opportunities for android projects in a CS1 course.	Ivaylo Ilinkin	https://doi.org/10.1145/2538862.2538983	TRUE
conf/sigcse/sigcse2014	SIGCSE	2014	373-378	6	Peer instruction	Peer instruction contributes to self-efficacy in CS1.	Daniel Zingaro	https://doi.org/10.1145/2538862.2538878	TRUE
conf/sigcse/sigcse2014	SIGCSE	2014	481-486	6	Research: predictors, creative thinking, co-linking courses	Perspectives on co-linking design and development courses in CS.	Yolanda Reimer; Michael Cassens	https://doi.org/10.1145/2538862.2538953	TRUE
conf/sigcse/sigcse2014	SIGCSE	2014	561-566	6	Operating systems and programming languages	PLCC: a programming language compiler compiler.	Timothy V. Fossum	https://doi.org/10.1145/2538862.2538922	TRUE
conf/sigcse/sigcse2014	SIGCSE	2014	439-444	6	Recruitment and retention of underrepresented groups	Project rise up 4 CS: increasing the number of black students who pass advanced placement CS A.	Barbara Ericson; Shelly Engelman; Tom McKlin; Ja'Quan Taylor	https://doi.org/10.1145/2538862.2538937	TRUE
conf/sigcse/sigcse2014	SIGCSE	2014	573-578	6	Soft skills: academic perspectives	Promoting ecoliteracy in an introductory database systems course: activities for the first week.	Daniela Inclezan; Luis Pradanos	https://doi.org/10.1145/2538862.2538909	TRUE
conf/sigcse/sigcse2014	SIGCSE	2014	641-646	6	Tools	Pythy: improving the introductory python programming experience.	Stephen H. Edwards; Daniel S. Tilden; Anthony Allevato	https://doi.org/10.1145/2538862.2538977	TRUE
conf/sigcse/sigcse2014	SIGCSE	2014	505-510	6	Focus on K-12: before middle school	Quantitative correlation between ability to compute and student performance in a primary school.	Osvaldo Luiz De Oliveira; Maria C. Nicoletti; Luis Mariano del Val Cura	https://doi.org/10.1145/2538862.2538890	TRUE
conf/sigcse/sigcse2014	SIGCSE	2014	301-306	6	Assessment and evaluation	Reinventing homework as cooperative, formative assessment.	Don Blaheta	https://doi.org/10.1145/2538862.2538915	TRUE
conf/sigcse/sigcse2014	SIGCSE	2014	689-694	6	Collecting and analyzing student data II	Remediation and student success in CIS programs.	Douglas A. Kranch	https://doi.org/10.1145/2538862.2538962	TRUE
conf/sigcse/sigcse2014	SIGCSE	2014	343-348	6	Focus on K-12: middle school	Remedying misperceptions of computer science among middle school students.	Shuchi Grover; Roy Pea; Stephen Cooper	https://doi.org/10.1145/2538862.2538934	TRUE
conf/sigcse/sigcse2014	SIGCSE	2014	193-198	6	Focus on K-12: growing the profession and professional development	Research experience for teachers: data analysis & mining, visualization, and image processing.	Rahman Mitchel Tashakkori; Robert Mitchell Parry; Adam Benoit; Rebecca A. Cooper; Jessica L. Jenkins; Nicholas T. Westveer	https://doi.org/10.1145/2538862.2538967	TRUE
conf/sigcse/sigcse2014	SIGCSE	2014	635-640	6	Tools	RSAvisual: a visualization tool for the RSA cipher.	Jun Tao; Jun Ma; Melissa S. Keranen; Jean Mayo; Ching-Kuang Shene; Chaoli Wang	https://doi.org/10.1145/2538862.2538891	TRUE
conf/sigcse/sigcse2014	SIGCSE	2014	397-402	6	Software engineering: courses	Selecting open source software projects to teach software engineering.	Thérèse Mary Smith; Robert McCartney; Swapna S. Gokhale; Lisa C. Kaczmarczyk	https://doi.org/10.1145/2538862.2538932	TRUE
conf/sigcse/sigcse2014	SIGCSE	2014	499-504	6	Focus on K-12: informal education, curriculum, and robots	Sneaking in through the back door: introducing k-12 teachers to robot programming.	Jennifer S. Kay; Janet G. Moss; Shelly Engelman; Tom McKlin	https://doi.org/10.1145/2538862.2538972	TRUE
conf/sigcse/sigcse2014	SIGCSE	2014	385-390	6	Peer instruction	Social effects of pair programming mitigate impact of bounded rationality.	Zhen Li; Eileen Kraemer	https://doi.org/10.1145/2538862.2538968	TRUE
conf/sigcse/sigcse2014	SIGCSE	2014	187-192	6	Focus on K-12: growing the profession and professional development	Spreading the word: introducing pre-service teachers to programming in the K12 classroom.	Scott Bell; Tim Frey; Eugene Y. Vasserman	https://doi.org/10.1145/2538862.2538963	TRUE
conf/sigcse/sigcse2014	SIGCSE	2014	181-186	6	Focus on K-12: growing the profession and professional development	STEM teaching as an additional profession for scientists and engineers: the case of computer science education.	Orit Hazzan; Noa Ragonis	https://doi.org/10.1145/2538862.2538879	TRUE
conf/sigcse/sigcse2014	SIGCSE	2014	55-60	6	Software engineering: projects	Student projects are not throwaways: teaching practical software maintenance in a software engineering course.	Claudia Szabo	https://doi.org/10.1145/2538862.2538965	TRUE
conf/sigcse/sigcse2014	SIGCSE	2014	313-318	6	Classroom management	Supporting CS education via virtualization and packages: tools for successfully accommodating "bring-your-own-device" at scale.	Andy Sayler; Dirk Grunwald; John Black; Elizabeth White; Matthew Monaco	https://doi.org/10.1145/2538862.2538928	TRUE
conf/sigcse/sigcse2014	SIGCSE	2014	61-66	6	Mathematical perspectives	Syrus: providing practice problems in discrete mathematics with instant feedback.	Diego Zaccai; Aditi Tagore; Dustin Hoffman; Jason Kirschenbaum; Zakariya Bainazarov; Harvey M. Friedman; Dennis K. Pearl; Bruce W. Weide	https://doi.org/10.1145/2538862.2538929	TRUE
conf/sigcse/sigcse2014	SIGCSE	2014	535-540	6	Security among the cloud	Taking a walk on the wild side: teaching cloud computing on distributed research testbeds.	Yanyan Zhuang; Chris Matthews; Stephen Tredger; Steven Ness; Jesse Short-Gershman; Li Ji; Niko Rebenich; Andrew French; Josh Erickson; Kyliah Clarkson; Yvonne Coady; Rick McGeer	https://doi.org/10.1145/2538862.2538931	TRUE
conf/sigcse/sigcse2014	SIGCSE	2014	567-572	6	Soft skills: academic perspectives	Teaching and learning computer science soft skills using soft skills: the students' perspective.	Orit Hazzan; Gadi Har-Shai	https://doi.org/10.1145/2538862.2538885	TRUE
conf/sigcse/sigcse2014	SIGCSE	2014	421-426	6	Web-based instruction	Teaching composition quality at scale: human judgment in the age of autograders.	John DeNero; Stephen Martinis	https://doi.org/10.1145/2538862.2538976	TRUE
conf/sigcse/sigcse2014	SIGCSE	2014	677-682	6	MOOCs	Teaching creative problem solving in a MOOC.	Pascal Van Hentenryck; Carleton Coffrin	https://doi.org/10.1145/2538862.2538913	TRUE
conf/sigcse/sigcse2014	SIGCSE	2014	127-132	6	Active learning	Teaching CS 1 with POGIL activities and roles.	Helen H. Hu; Tricia D. Shepherd	https://doi.org/10.1145/2538862.2538954	TRUE
conf/sigcse/sigcse2014	SIGCSE	2014	549-554	6	Operating systems and programming languages	Teaching operating systems using code review.	Christoffer Dall; Jason Nieh	https://doi.org/10.1145/2538862.2538894	TRUE
conf/sigcse/sigcse2014	SIGCSE	2014	523-528	6	Security among the cloud	Teaching the security mindset with reference monitors.	Justin Cappos; Richard S. Weiss	https://doi.org/10.1145/2538862.2538939	TRUE
conf/sigcse/sigcse2014	SIGCSE	2014	67-72	6	Mathematical perspectives	Teaching theoretical computer science using a cognitive apprenticeship approach.	Maria Knobelsdorf; Christoph Kreitz; Sebastian Böhne	https://doi.org/10.1145/2538862.2538944	TRUE
conf/sigcse/sigcse2014	SIGCSE	2014	659-664	6	Focus on K-12: outreach and computational thinking	The consume - create spectrum: balancing convenience and computational thinking in stem learning.	Ashok R. Basawapatna; Alexander Repenning; Kyu Han Koh; Mark Savignano	https://doi.org/10.1145/2538862.2538950	TRUE
conf/sigcse/sigcse2014	SIGCSE	2014	199-204	6	Design: courses and curricula	The design of Sweden's first 5-year computer science and software engineering program.	Fredrik Heintz; Inger Erlander Klein	https://doi.org/10.1145/2538862.2538925	TRUE
conf/sigcse/sigcse2014	SIGCSE	2014	487-492	6	Focus on K-12: informal education, curriculum, and robots	They can't find us: the search for informal CS education.	Betsy James DiSalvo; Cecili Reid; Parisa Khanipour Roshan	https://doi.org/10.1145/2538862.2538933	TRUE
conf/sigcse/sigcse2014	SIGCSE	2014	247-252	6	Tactile computing	Tracking @stemxcomet: teaching programming to blind students via 3D printing, crisis management, and twitter.	Shaun K. Kane; Jeffrey P. Bigham	https://doi.org/10.1145/2538862.2538975	TRUE
conf/sigcse/sigcse2014	SIGCSE	2014	289-294	6	CS2	Transforming introductory computer science projects via real-time web data.	Austin Cory Bart; Eli Tilevich; T. Simin Hall; Tony Allevato; Clifford A. Shaffer	https://doi.org/10.1145/2538862.2538941	TRUE
conf/sigcse/sigcse2014	SIGCSE	2014	97-102	6	Engaging students through artistic expression	Underrepresented middle school girls: on the path to computer science through paper prototyping.	Ashley Robinson; Manuel A. Pérez-Quiñones	https://doi.org/10.1145/2538862.2538951	TRUE
conf/sigcse/sigcse2014	SIGCSE	2014	163-168	6	Games	Use and development of entertainment technologies in after school STEM program.	Veronica Cateté; Kathleen Wassell; Tiffany Barnes	https://doi.org/10.1145/2538862.2538952	TRUE
conf/sigcse/sigcse2014	SIGCSE	2014	49-54	6	Software engineering: projects	Using a real world project in a software testing course.	Daniel E. Krutz; Samuel A. Malachowsky; Thomas Reichlmayr	https://doi.org/10.1145/2538862.2538955	TRUE
conf/sigcse/sigcse2014	SIGCSE	2014	603-608	6	Extending frameworks	Using a software framework to enhance online teaching of shader-based OpenGL.	James R. Miller	https://doi.org/10.1145/2538862.2538892	TRUE
conf/sigcse/sigcse2014	SIGCSE	2014	229-234	6	Collecting and analyzing student data I	Using CodeBrowser to seek differences between novice programmers.	Kenny Heinonen; Kasper Hirvikoski; Matti Luukkainen; Arto Vihavainen	https://doi.org/10.1145/2538862.2538981	TRUE
conf/sigcse/sigcse2014	SIGCSE	2014	349-354	6	Soft skills: industry perspectives	Workplace scenarios to integrate communication skills and content: a case study.	Mark E. Hoffman; Paul V. Anderson; Magnus Gustafsson	https://doi.org/10.1145/2538862.2538916	TRUE
conf/sigcse/sigcse2015	SIGCSE	2015	682	1	Poster Session I	"Maker Innovators": A Workshop for Youth Creating Responsive and Wearable Game Interfaces with Tangible and Digital Construction Toolkits (Abstract Only).	Gabriela T. Richard; Yasmin B. Kafai	https://doi.org/10.1145/2676723.2691943	FALSE
conf/sigcse/sigcse2015	SIGCSE	2015	678	1	Poster Session I	A Bottom-Up Approach to Teaching Server-Side Web Development Skills (Abstract Only).	Ariel Ortiz	https://doi.org/10.1145/2676723.2691922	FALSE
conf/sigcse/sigcse2015	SIGCSE	2015	677	1	Poster Session I	A Case Study on Adding Computer Science as a Math Graduation Elective: A Report from the Alabama CS/Mathematics Crosswalk Committee (Abstract Only).	Jeff Gray; Mary Boehm; Carol Crawford; Jeff Baker; Gina McCarley; Kitty Morgan; Kelley Rouze; Jill Westerlund; Carol Yarbrough	https://doi.org/10.1145/2676723.2691915	FALSE
conf/sigcse/sigcse2015	SIGCSE	2015	178	1	Demonstration Session	A Classroom Tested Accessible Multimedia Resource for Engaging Underrepresented Students in Computing: The University of Maryland Curriculum In A Box.	Elissa M. Redmiles; Mary Allison Abad; Isabella Coronado; Sean Kross; Amelia Malone	https://doi.org/10.1145/2676723.2691870	FALSE
conf/sigcse/sigcse2015	SIGCSE	2015	207-211	5	Paper Session: Gender & Diversity	A Comparative Study of the Acceptability of Signs for the Brazilian Sign Language Created in Person and Remotely.	Francisco C. de M. B. Oliveira; Gerarda N. C. Gomes; Adriano T. de Freitas; Anibal C. de Oliveira; Lidiane C. Silva; Bruno Queiroz	https://doi.org/10.1145/2676723.2677293	FALSE
conf/sigcse/sigcse2015	SIGCSE	2015	691	1	Poster Session II	A Gateway Game to Make Computational Problem Solving Accessible and Engaging (Abstract Only).	Emmett Tomai; Roberto Flores; Casey Richardson; Jose Rojas; Julio Oliva; German Zuniga	https://doi.org/10.1145/2676723.2691949	FALSE
conf/sigcse/sigcse2015	SIGCSE	2015	685	1	Poster Session II	A Nearest Neighbors Analysis of Student Academic Performance in Computer Science (Abstract Only).	R. Mitchell Parry	https://doi.org/10.1145/2676723.2691898	FALSE
conf/sigcse/sigcse2015	SIGCSE	2015	514-513	0	Lightning Talk Session	A Peer Tutoring Model for Small Schools with Limited Funding and Resources (Abstract Only).	Dee A. B. Weikle	https://doi.org/10.1145/2676723.2691886	FALSE
conf/sigcse/sigcse2015	SIGCSE	2015	680	1	Poster Session I	A Qualitative Analysis of Students' Difficulties with the Quicksort Algorithm Using Arrays (Abstract Only).	Amit Maor	https://doi.org/10.1145/2676723.2691933	FALSE
conf/sigcse/sigcse2015	SIGCSE	2015	706	1	Friday Workshops	A Swift Introduction to Swift App Development (Abstract Only).	Michael P. Rogers; William M. Siever	https://doi.org/10.1145/2676723.2678281	FALSE
conf/sigcse/sigcse2015	SIGCSE	2015	693	1	Birds of a Feather Flock I	A Town Meeting: SIGCSE Committee on Expanding the Women-in-Computing Community (Abstract Only).	Gloria Childress Townsend	https://doi.org/10.1145/2676723.2691847	FALSE
conf/sigcse/sigcse2015	SIGCSE	2015	689	1	Poster Session II	A Web-based Simulator for Learning Multiprocessor Real-time Scheduling (Abstract Only).	Yuting Zhang; Xin Shan; Yingyuan Zhang; Juejie Wang	https://doi.org/10.1145/2676723.2691938	FALSE
conf/sigcse/sigcse2015	SIGCSE	2015	715	1	Undergraduate & Graduate Abstract	ACEit!: Assist Children in English-language (Abstract Only).	Jae-Hyun Choe	https://doi.org/10.1145/2676723.2693626	FALSE
conf/sigcse/sigcse2015	SIGCSE	2015	436-437	2	Special Session	Achieving a shared goal with AP Computer Science A and AP Computer Science Principles.	Paul T. Tymann; Frances P. Trees; Lester L. Wainwright; Richard Kick; Sandy Czajka; Andrew Kuemmel; Lien Diaz	https://doi.org/10.1145/2676723.2677325	FALSE
conf/sigcse/sigcse2015	SIGCSE	2015	699	1	Birds of a Feather Flock II	Addressing Professional Development Needs for K-12 CS: Working with Your Local CSTA Chapter (Abstract Only).	David Reed; Frances P. Trees	https://doi.org/10.1145/2676723.2691836	FALSE
conf/sigcse/sigcse2015	SIGCSE	2015	681	1	Poster Session I	Algorithmic Thinking: Program that Solve Well-defined Visual Problems (Abstract Only).	Elodie Fourquet	https://doi.org/10.1145/2676723.2691935	FALSE
conf/sigcse/sigcse2015	SIGCSE	2015	514	1	Lightning Talk Session	An Across-Institution Anytime MOOC in Database.	Douglas Fisher	https://doi.org/10.1145/2676723.2691887	FALSE
conf/sigcse/sigcse2015	SIGCSE	2015	698	1	Birds of a Feather Flock II	AP CS A: Sharing Teching Strategies and Curricular Ideas (Abstract Only).	Paul T. Tymann; Lester Wainright; Sandy Czajka	https://doi.org/10.1145/2676723.2691832	FALSE
conf/sigcse/sigcse2015	SIGCSE	2015	700	1	Birds of a Feather Flock II	Assessments for Computational Thinking in K-12 (Abstract Only).	Shuchi Grover; Marie A. Bienkowski; Eric Snow	https://doi.org/10.1145/2676723.2691843	FALSE
conf/sigcse/sigcse2015	SIGCSE	2015	709	1	Friday Workshops	Augmenting introductory Computer Science Classes with GameMaker and Mobile Apps (Abstract Only).	Veronica Cateté; Barry W. Peddycord III; Tiffany Barnes	https://doi.org/10.1145/2676723.2678307	FALSE
conf/sigcse/sigcse2015	SIGSCE	2015	717	1	Undergraduate & Graduate Abstract	Automatic Fall Detection Using Mobile Devices (Abstract Only).	Melissa Katherine Mulcahy	https://doi.org/10.1145/2676723.2693636	FALSE
conf/sigcse/sigcse2015	SIGSCE	2015	696	1	Birds of a Feather Flock I	Automatically Generated Feedback for CS student Work: Best Practices (Abstract Only).	Bruce W. Char; Jeffrey L. Popyack; Jeremy R. Johnson; William M. Mongan	https://doi.org/10.1145/2676723.2691865	FALSE
conf/sigcse/sigcse2015	SIGSCE	2015	677	1	Poster Session I	Automating Software Engineering Best Practices Using an Open Source Continuous Integration Framework (Abstract Only).	Sarah Heckman; Jason King; Michael Winters	https://doi.org/10.1145/2676723.2691921	FALSE
conf/sigcse/sigcse2015	SIGSCE	2015	716	1	Undergraduate & Graduate Abstract	Automation of Layer 7 DDoS Attacks and Post Forensic Analysis of Server Logs.	Barry Hamilton Jr.	https://doi.org/10.1145/2676723.2693632	FALSE
conf/sigcse/sigcse2015	SIGSCE	2015	447-451	5	Paper Session: CS Education Research	Bats, Balls, and Lures: Cognitive Style in CS Education.	Barry Wittman; Jean Pretz	https://doi.org/10.1145/2676723.2677291	FALSE
conf/sigcse/sigcse2015	SIGSCE	2015	267-268	2	Panel Session	Best Practices for IRB Approval: Four Perspectives.	Michael S. Kirkpatrick; Janice E. Cuny; Mark Guzdial; Amanda M. Holland-Minkley; Clifford A. Shaffer	https://doi.org/10.1145/2676723.2677330	FALSE
conf/sigcse/sigcse2015	SIGSCE	2015	591-592	2	Special Session	Big Data in Computer Science Education Research.	Orit Hazzan; Clifford A. Shaffer	https://doi.org/10.1145/2676723.2677318	FALSE
conf/sigcse/sigcse2015	SIGSCE	2015	692	1	Birds of a Feather Flock I	Birds of a Feather: Mapping Alice Curriculum to Standards (Abstract Only).	Donald J. Slater; Wanda Dann; Stephen Cooper	https://doi.org/10.1145/2676723.2691838	FALSE
conf/sigcse/sigcse2015	SIGSCE	2015	703	1	Birds of a Feather Flock II	Blended CS Courses using Massive, Open, Online Courses (and other Online Resources) (Abstract Only).	Douglas H. Fisher; Janet Burge; Mary Lou Maher; Jerry Roth	https://doi.org/10.1145/2676723.2691866	FALSE
conf/sigcse/sigcse2015	SIGSCE	2015	5	1	Demonstration Session	Blockly Language Creation and Applications: Visual Programming for Media Computation and Bluetooth Robotics Control.	Jake Trower; Jeff Gray	https://doi.org/10.1145/2676723.2691871	FALSE
conf/sigcse/sigcse2015	SIGSCE	2015	80-81	2	Panel Session	Booming Enrollments: Good Times?	Tracy Camp; Stu Zweben; Ellen Walker; Lecia Barker	https://doi.org/10.1145/2676723.2677333	FALSE
conf/sigcse/sigcse2015	SIGSCE	2015	692	1	Birds of a Feather Flock I	Brainstorming How to Use Lego Mindstorms EV3 in the Classroom (Abstract Only).	Greg Kawell; Benjamin Schafer	https://doi.org/10.1145/2676723.2691840	FALSE
conf/sigcse/sigcse2015	SIGSCE	2015	707	1	Friday Workshops	Bridging the Divide: Developing Culturally-Responsive Curriculum for K-12 Computer Science Education (Abstract Only).	Alicia Nicki Washington; Legand Burge; Marlon Mejias; Ketly Jean-Pierre; Qi'Anne Knox	https://doi.org/10.1145/2676723.2678297	FALSE
conf/sigcse/sigcse2015	SIGSCE	2015	671-672	2	Panel Session	Bringing Grades K-5 to the Mainstream of Computer Science Education.	Katie Apone; Marina Umaschi Bers; Karen Brennan; Diana Franklin; Maya Israel; Pat Yongpradit	https://doi.org/10.1145/2676723.2677332	FALSE
conf/sigcse/sigcse2015	SIGSCE	2015	344-345	2	Special Session	Budget Beowulfs: A Showcase of Inexpensive Clusters for Teaching PDC.	Joel C. Adams; Jacob Caswell; Suzanne J. Matthews; Charles Peck; Elizabeth Shoop; David Toth	https://doi.org/10.1145/2676723.2677317	FALSE
conf/sigcse/sigcse2015	SIGSCE	2015	711	1	Saturday Workshops	Building Code Magnet Labs for Tablets and Other Devices (Abstract Only).	Barry L. Kurtz; Rahman Tashakkori; Ahmad Esmaili	https://doi.org/10.1145/2676723.2678294	FALSE
conf/sigcse/sigcse2015	SIGSCE	2015	688	1	Poster Session II	Building the Pascaline: Digital Computing Like It's 1642 (Abstract Only).	David S. Touretzky	https://doi.org/10.1145/2676723.2691911	FALSE
conf/sigcse/sigcse2015	SIGSCE	2015	702	1	Birds of a Feather Flock II	Can Programming Boot Camp Help Under-represented College Students Succeed in Computing Degrees? (Abstract Only).	Kristine S. Nagel; Sonal Dekhane; Nannette P. Napier	https://doi.org/10.1145/2676723.2691859	FALSE
conf/sigcse/sigcse2015	SIGSCE	2015	680	1	Poster Session I	Case Studies of Use: Creating Counselor Champions for Change in K12 Computing Education (Abstract Only).	Sarah Hug; Jane Krauss; Catherine Ashcraft	https://doi.org/10.1145/2676723.2691932	FALSE
conf/sigcse/sigcse2015	SIGSCE	2015	512	1	Lightning Talk Session	coaster: Teaching Computer Graphics Incrementally (Abstract Only).	Robert R. Lewis	https://doi.org/10.1145/2676723.2691880	FALSE
conf/sigcse/sigcse2015	SIGSCE	2015	587-590	4	Paper Session: Focus on K-12: Outreach/Summer Camps	Computational Bead Design: A Pilot Summer Camp in Computer Aided Design and 3D Printing for Middle School Girls.	Courtney Starrett; Marguerite Doman; Chlotia Garrison; Merry Sleigh	https://doi.org/10.1145/2676723.2677303	FALSE
conf/sigcse/sigcse2015	SIGSCE	2015	715	1	Undergraduate & Graduate Abstract	Computational Creativity in the Culinary Arts (Abstract Only).	Erol Cromwell	https://doi.org/10.1145/2676723.2693627	FALSE
conf/sigcse/sigcse2015	SIGSCE	2015	176-177	2	Special Session	Computer Science Principles Curricula: On-the-ground; adoptable; adaptable; approaches to teaching.	Daniel D. Garcia; Owen L. Astrachan; Bennett Brown; Jeffrey G. Gray; Calvin Lin; Bradley Beth; Ralph Morelli; Marie desJardins; Nigmanath Sridhar	https://doi.org/10.1145/2676723.2677323	FALSE
conf/sigcse/sigcse2015	SIGSCE	2015	710	1	Saturday Workshops	Computer Science Principles With EarSketch (Abstract Only).	Jason Freeman; Brian Magerko; Regis Verdin	https://doi.org/10.1145/2676723.2678282	FALSE
conf/sigcse/sigcse2015	SIGSCE	2015	697	1	Birds of a Feather Flock I	Computer Science Principles: Expanding the Community (Abstract Only).	Owen L. Astrachan; Lien Diaz; Amy Briggs; Fran Trees; Richard Kick	https://doi.org/10.1145/2676723.2691868	FALSE
conf/sigcse/sigcse2015	SIGSCE	2015	701	1	Birds of a Feather Flock II	Computer Science: Small Department Initiative (Abstract Only).	Catherine C. Bareiss	https://doi.org/10.1145/2676723.2691851	FALSE
conf/sigcse/sigcse2015	SIGSCE	2015	676	1	Poster Session I	Computing in the Classroom: A Workshop for Teachers to Infuse Computational Thinking into K-12 Classrooms (Abstract Only).	Yesem Kurt-Peker; Lydia Ray; Rania A. HodHod; Shamim Khan	https://doi.org/10.1145/2676723.2691906	FALSE
conf/sigcse/sigcse2015	SIGSCE	2015	687	1	Poster Session II	Conceptum: An Online Infrastructure for Concept Inventories (Abstract Only).	Guatam Mohan; Benjamin Rempel; Eli Rosenberg; David Wurtele; Cynthia Taylor; Kevin C. Webb	https://doi.org/10.1145/2676723.2691907	FALSE
conf/sigcse/sigcse2015	SIGSCE	2015	706	1	Friday Workshops	Conducting Educational Research in the Computer Science Classroom: Choosing the Appropriate Research Design to Address your Research Questions (Abstract Only).	Aman Yadav	https://doi.org/10.1145/2676723.2678284	FALSE
conf/sigcse/sigcse2015	SIGSCE	2015	685	1	Poster Session II	Conflict-Driven Cooperative-Learning in Computing Courses (Abstract Only).	Swaroop Joshi; Neelam Soundarajan; Rajiv Ramnath	https://doi.org/10.1145/2676723.2691897	FALSE
conf/sigcse/sigcse2015	SIGSCE	2015	4	1	Keynote Address	Connected, Committed and Social?: The Consequences of Computing for Relationships.	Keith N. Hampton	https://doi.org/10.1145/2676723.2694803	FALSE
conf/sigcse/sigcse2015	SIGSCE	2015	684	1	Poster Session II	Correlating ACM Core IT Learning Outcomes with Associate Degree and Certificate Programs (Abstract Only).	Cara Tang; Cindy S. Tucker; Elizabeth K. Hawthorne	https://doi.org/10.1145/2676723.2691892	FALSE
conf/sigcse/sigcse2015	SIGSCE	2015	696	1	Birds of a Feather Flock I	Creating Assessment Tools for Cybersecurity Education (Abstract Only).	Geoffrey L. Herman; Ronald Dodge	https://doi.org/10.1145/2676723.2691863	FALSE
conf/sigcse/sigcse2015	SIGSCE	2015	677	1	Poster Session I	Creating New Languages in Blockly: Two Case Studies in Media Computation and Robotics (Abstract Only).	Jake Trower; Jeff Gray	https://doi.org/10.1145/2676723.2691916	FALSE
conf/sigcse/sigcse2015	SIGSCE	2015	711	1	Saturday Workshops	Creating Stimulating, Relevant, and Manageable Introductory Computer Science Projects that Utilize Real-Time, Large, Web-Based Datasets (Abstract Only).	Eli Tilevich; Clifford A. Shaffer; Austin Cory Bart	https://doi.org/10.1145/2676723.2678292	FALSE
conf/sigcse/sigcse2015	SIGSCE	2015	701	1	Birds of a Feather Flock II	CS 4 Everyone: Diversifying the K-12 Pipeline for CS at College and High School Level (Abstract Only).	Farzana Rahman; Jennifer Stevens; Sharon Simmons	https://doi.org/10.1145/2676723.2691913	FALSE
conf/sigcse/sigcse2015	SIGSCE	2015	680	1	Poster Session I	CS2013 Assessment Exam (Abstract Only).	E. Kent Palmer; Terry Linkletter; Paulette Alexander; Patricia L. Roden; Kewal Dhariwal; Indira R. Guzman	https://doi.org/10.1145/2676723.2691931	FALSE
conf/sigcse/sigcse2015	SIGSCE	2015	686	1	Poster Session II	CSteach: Engaging Latino/a Youth in Computer Science with Social Justice and Near Peers (Abstract Only).	Louise Ann Lyon; Jill Denner; Jacob Martinez	https://doi.org/10.1145/2676723.2691904	FALSE
conf/sigcse/sigcse2015	SIGSCE	2015	681	1	Poster Session I	Culturally Responsive Computing: An In-depth Examination of Outcomes in COMPUGIRLS (Abstract Only).	Catherine Ashcraft	https://doi.org/10.1145/2676723.2691936	FALSE
conf/sigcse/sigcse2015	SIGSCE	2015	265-266	2	Special Session	Curricular Assessment: Tips and Techniques.	Henry M. Walker; Sue Fitzgerald; John F. Dooley	https://doi.org/10.1145/2676723.2677319	FALSE
conf/sigcse/sigcse2015	SIGSCE	2015	715	1	Undergraduate & Graduate Abstract	Data Mining: Building Better Bug Messages (Abstract Only).	Mindy DeWaal	https://doi.org/10.1145/2676723.2693628	FALSE
conf/sigcse/sigcse2015	SIGSCE	2015	3	1	Keynote Address	Data Structures Courses: Past, Present, and Future.	Mark Allen Weiss	https://doi.org/10.1145/2676723.2694801	FALSE
conf/sigcse/sigcse2015	SIGSCE	2015	713	1	Saturday Workshops	Decoding CS Principles: A Curriculum from Code.org (Abstract Only).	Baker Franke; Rebecca Brook Osborne	https://doi.org/10.1145/2676723.2678309	FALSE
conf/sigcse/sigcse2015	SIGSCE	2015	714	1	Undergraduate & Graduate Abstract	Developing a Robotics Education Platform using Android Based Cellbots (Abstract Only).	Donald D. Buhl-Brown	https://doi.org/10.1145/2676723.2693625	FALSE
conf/sigcse/sigcse2015	SIGSCE	2015	690	1	Poster Session II	Developing Computational Thinking Through Image Making and Constructionist Learning (Abstract Only).	Eileen Fordham; Halley Freger; Amanda Hinchman-Dominguez; Alexander Mitchell; Daniel Rebelsky; Victoria Tsou; Earnest Wheeler; Zoe Wolter; Samuel A. Rebelsky	https://doi.org/10.1145/2676723.2691940	FALSE
conf/sigcse/sigcse2015	SIGSCE	2015	717	1	Undergraduate & Graduate Abstract	Development of an Offset Detection Task for MIREX 2015 (Abstract Only).	Darrion Jarrell Long; David Heise	https://doi.org/10.1145/2676723.2693635	FALSE
conf/sigcse/sigcse2015	SIGSCE	2015	679	1	Poster Session I	E-Assess: A Web-Based Tool for Coordinating and Managing Program Assessment (Abstract Only).	Jean H. French; D. Brian Larkins	https://doi.org/10.1145/2676723.2691930	FALSE
conf/sigcse/sigcse2015	SIGSCE	2015	5	1	Demonstration Session	EarSketch: A Web-based Environment for Teaching Introductory Computer Science Through Music Remixing.	Jason Freeman; Brian Magerko; Regis Verdin	https://doi.org/10.1145/2676723.2691869	FALSE
conf/sigcse/sigcse2015	SIGSCE	2015	1	1	Keynote Address	Educating for Both Art and Technology.	Jessica K. Hodgins	https://doi.org/10.1145/2676723.2694804	FALSE
conf/sigcse/sigcse2015	SIGSCE	2015	701	1	Birds of a Feather Flock II	Empirical Research in CS Education (Abstract Only).	Mark Sherriff; Sarah Heckman	https://doi.org/10.1145/2676723.2691853	FALSE
conf/sigcse/sigcse2015	SIGSCE	2015	440	1	Demonstration Session	ENGAGE: A Game-based Learning Environment for Middle School Computational Thinking.	Kristy Elizabeth Boyer; Philip Sheridan Buffum; Kirby Culbertson; Megan Hardy Frankosky; James C. Lester; Allison G. Martínez-Arocho; Wookhee Min; Bradford W. Mott; Fernando J. Rodríguez; Eric N. Wiebe	https://doi.org/10.1145/2676723.2691876	FALSE
conf/sigcse/sigcse2015	SIGSCE	2015	271	1	Demonstration Session	EngageCSEdu: CS1 and CS2 Materials for Engaging and Retaining Undergraduate CS Students.	Alvaro E. Monge; Beth A. Quinn; Cameron L. Fadjo	https://doi.org/10.1145/2676723.2691875	FALSE
conf/sigcse/sigcse2015	SIGSCE	2015	679	1	Poster Session I	Evaluating Scratch Programs to Assess Computational Thinking in a Science Lesson (Abstract Only).	Jennifer Albert; Barry W. Peddycord III; Tiffany Barnes	https://doi.org/10.1145/2676723.2691928	FALSE
conf/sigcse/sigcse2015	SIGSCE	2015	675	1	Poster Session I	Exploring Computer Science Course and Math Achievement (Abstract Only).	Daniel W. Lewis; Lisa Kohne; Timothy Mechlinski; Mariana Schmalstig	https://doi.org/10.1145/2676723.2691895	FALSE
conf/sigcse/sigcse2015	SIGSCE	2015	440	1	Demonstration Session	Exploring Computer Science Topics with Programmable Smartwatches.	Shuo Niu; Andrey Esakia; D. Scott McCrickard	https://doi.org/10.1145/2676723.2691874	FALSE
conf/sigcse/sigcse2015	SIGSCE	2015	685	1	Poster Session II	Extending SQL Auto-Grading to DML and DDL Statements (Abstract Only).	Carsten Kleiner; Felix Heine; Bastian Fischer	https://doi.org/10.1145/2676723.2691896	FALSE
conf/sigcse/sigcse2015	SIGSCE	2015	675	1	Poster Session I	Factors Affecting High School Student Engagement in Introductory Computer Science Classes (Abstract Only).	Sarah J. Wille; Dae Kim	https://doi.org/10.1145/2676723.2691891	FALSE
conf/sigcse/sigcse2015	SIGSCE	2015	716	1	Undergraduate & Graduate Abstract	Focused Mining of University Course Descriptions from Highly Variable Sources (Abstract Only).	Thomas D. Effland	https://doi.org/10.1145/2676723.2693630	FALSE
conf/sigcse/sigcse2015	SIGSCE	2015	719	1	Back Matter Items	FrenchPress Gives Students Automated Feedback on Java Program Flaws (Abstract Only).	Hannah Blau	https://doi.org/10.1145/2676723.2693617	FALSE
conf/sigcse/sigcse2015	SIGSCE	2015	689	1	Poster Session II	Gender Differences in High School Students' Decisions to Study Computer Science and Related Fields (Abstract Only).	Hai Hong; Jennifer Wang; Jason Ravitz; Mo-Yun Lei Fong	https://doi.org/10.1145/2676723.2691920	FALSE
conf/sigcse/sigcse2015	SIGSCE	2015	697	1	Birds of a Feather Flock I	Handling Very Large Lecture Courses: Keeping the Wheels on the Bus (Abstract Only).	Josh Hug; Daniel D. Garcia	https://doi.org/10.1145/2676723.2691867	FALSE
conf/sigcse/sigcse2015	SIGSCE	2015	514	1	Lightning Talk Session	HFOSS-Lite in CS2: Incorporating the Ushahidi Crowdmapping Program in a Data Structures and Algorithms Course (Abstract Only).	Samuel A. Rebelsky	https://doi.org/10.1145/2676723.2691885	FALSE
conf/sigcse/sigcse2015	SIGSCE	2015	708	1	Friday Workshops	How to Plan and Run Summer Computing Camps: Logistics (Abstract Only).	Marguerite A. Doman; Barbara J. Ericson; Kristine S. Nagel; Nannette P. Napier; Krishnendu Roy	https://doi.org/10.1145/2676723.2678302	FALSE
conf/sigcse/sigcse2015	SIGSCE	2015	512	1	Lightning Talk Session	Hugging and Bridging: What It Is And Why You Should Be Doing It! (Abstract Only).	Shuchi Grover	https://doi.org/10.1145/2676723.2691881	FALSE
conf/sigcse/sigcse2015	SIGSCE	2015	714	1	Undergraduate & Graduate Abstract	Improvement of Robot Mapping and Localization Using Combined Sensory Data (Abstract Only).	Deanna Biesan	https://doi.org/10.1145/2676723.2693623	FALSE
conf/sigcse/sigcse2015	SIGSCE	2015	558-562	5	Paper Session: Non-majors/Interdisciplinary	Improving Non-CS Major Performance in CS1.	Victor T. Norman; Joel C. Adams	https://doi.org/10.1145/2676723.2677214	FALSE
conf/sigcse/sigcse2015	SIGSCE	2015	203-206	4	Paper Session: Gender & Diversity	Improving Undergraduate Student Performance in Computer Science at Historically Black Colleges and Universities (HBCUs) through Industry Partnerships.	Alicia Nicki Washington; Legand Burge; Marlon Mejias; Ketly Jean-Pierre; Qi'Anne Knox	https://doi.org/10.1145/2676723.2677277	FALSE
conf/sigcse/sigcse2015	SIGSCE	2015	709	1	Friday Workshops	Infusing Cooperative Learning into Early Computer Science Courses to Support Improved Engagement (Abstract Only).	Jeff Gray; Fran Trees; Owen L. Astrachan	https://doi.org/10.1145/2676723.2678310	FALSE
conf/sigcse/sigcse2015	SIGSCE	2015	600-603	4	Paper Session: Teaching Practices	Insights into Teaching and Learning: Reflections on MOOC Experiences.	Janet Burge	https://doi.org/10.1145/2676723.2677243	FALSE
conf/sigcse/sigcse2015	SIGSCE	2015	679	1	Poster Session I	Integrating Cutting Edge Devices to Increase Student Retention in Programming (Abstract Only).	Evelyn Brannock; Robert Lutz; Mai Yin Tsoi	https://doi.org/10.1145/2676723.2691929	FALSE
conf/sigcse/sigcse2015	SIGSCE	2015	82-83	2	Special Session	Integrating Live Projects Into Computing Curriculum.	Joe D. Chase; Premchand Uppuluri; Tracy L. Lewis; Ian Barland; Jeff Pittges	https://doi.org/10.1145/2676723.2677320	FALSE
conf/sigcse/sigcse2015	SIGSCE	2015	686	1	Poster Session II	Integrating Mobile Computing and Security into a Computer Science Curriculum (Abstract Only).	Xiaohong Yuan; Kelvin S. Bryant; Kenneth Williams; Jinsheng Xu	https://doi.org/10.1145/2676723.2691902	FALSE
conf/sigcse/sigcse2015	SIGSCE	2015	513	1	Lightning Talk Session	Integrating Programming into Physics and Algebra (Abstract Only).	Eric Andrew Freudenthal; Kien Lim; Karla Carmona; Catherine Tabor	https://doi.org/10.1145/2676723.2691884	FALSE
conf/sigcse/sigcse2015	SIGSCE	2015	705	1	Wednesday Workshops	Intellectual Property Law Basics for Computer Science Instructors (Abstract Only).	David G. Kay	https://doi.org/10.1145/2676723.2678298	FALSE
conf/sigcse/sigcse2015	SIGSCE	2015	695	1	Birds of a Feather Flock I	Interactive Ebooks and Course Materials: A BOF for Authors and Instructors (Abstract Only).	Cay Horstmann; Smita Bakshi; Amruth Kumar; Frank Vahid	https://doi.org/10.1145/2676723.2691856	FALSE
conf/sigcse/sigcse2015	SIGSCE	2015	712	1	Saturday Workshops	Introducing Secure Coding in CS0, CS1, and CS2. (Abstract Only).	Siddharth Kaza; Blair Taylor; Elizabeth K. Hawthorne	https://doi.org/10.1145/2676723.2678300	FALSE
conf/sigcse/sigcse2015	SIGSCE	2015	518-519	2	Special Session	Introduction to AccessCS10K and Accessible Tools for Teaching Programming.	Andreas Stefik; Richard E. Ladner	https://doi.org/10.1145/2676723.2677321	FALSE
conf/sigcse/sigcse2015	SIGSCE	2015	682	1	Poster Session I	It's Not Just About Functionality Anymore: Expanding Student Projects with Web Ecosystems (Abstract Only).	Samuel A. Rebelsky	https://doi.org/10.1145/2676723.2691942	FALSE
conf/sigcse/sigcse2015	SIGSCE	2015	599	1	Demonstration Session	JavaTutor: An Intelligent Tutoring System that Adapts to Cognitive and Affective States during Computer Programming.	Joseph B. Wiggins; Kristy Elizabeth Boyer; Alok Baikadi; Aysu Ezen-Can; Joseph F. Grafsgaard; Eunyoung Ha; James C. Lester; Christopher Michael Mitchell; Eric N. Wiebe	https://doi.org/10.1145/2676723.2691877	FALSE
conf/sigcse/sigcse2015	SIGSCE	2015	694	1	Birds of a Feather Flock I	Juggling the Jigsaw: Enabling CS1 Growing Enrollment and Diversity at Undergraduate Institutions (Abstract Only).	Farzana Rahman; Dee A. B. Weikle	https://doi.org/10.1145/2676723.2691855	FALSE
conf/sigcse/sigcse2015	SIGSCE	2015	718	1	Undergraduate & Graduate Abstract	Jumping Implementation in Video Games (Abstract Only).	Joseph Rioux; James Vanderhyde	https://doi.org/10.1145/2676723.2693639	FALSE
conf/sigcse/sigcse2015	SIGSCE	2015	675	1	Poster Session I	Just Enough Programming for Eight-years Olds (Abstract Only).	Karen H. Jin; Gavin Kearns	https://doi.org/10.1145/2676723.2691899	FALSE
conf/sigcse/sigcse2015	SIGSCE	2015	708-707	0	Birds of a Feather Flock I	K12 CS Teaching Methods Courses (Abstract Only).	Shuchi Grover; R. Benjamin Shapiro; Brian Dorn	https://doi.org/10.1145/2676723.2691842	FALSE
conf/sigcse/sigcse2015	SIGSCE	2015	712	1	Saturday Workshops	KELP CS and LaPlaya: A Computational Thinking Curriculum and Development Environment for 4th - 6th Grade (Abstract Only).	Diana Franklin; Hilary A. Dwyer	https://doi.org/10.1145/2676723.2678304	FALSE
conf/sigcse/sigcse2015	SIGSCE	2015	513	1	Lightning Talk Session	Launching CROMA: Computational Research On Music & Audio.	David Heise	https://doi.org/10.1145/2676723.2691883	FALSE
conf/sigcse/sigcse2015	SIGSCE	2015	515	1	Lightning Talk Session	Learning Computer Networking Through Illustration (Abstract Only).	Wen-Jung Hsin	https://doi.org/10.1145/2676723.2691889	FALSE
conf/sigcse/sigcse2015	SIGSCE	2015	689	1	Poster Session II	Learning from What Works: Improving an Introductory Computing Course for Architects with Teaching Methods from Media Computation (Abstract Only).	Nicholas Senske	https://doi.org/10.1145/2676723.2691925	FALSE
conf/sigcse/sigcse2015	SIGSCE	2015	271	1	Demonstration Session	Looking Glass.	Caitlin Kelleher	https://doi.org/10.1145/2676723.2691873	FALSE
conf/sigcse/sigcse2015	SIGSCE	2015	684	1	Poster Session II	Madeup: A Language for Making Things Up (Abstract Only).	Chris Johnson; Peter Bui	https://doi.org/10.1145/2676723.2691893	FALSE
conf/sigcse/sigcse2015	SIGSCE	2015	513	1	Lightning Talk Session	Making Computer Science a First-Class Object in the K-12 Next Generation Science Standards (Abstract Only).	Marie A. Bienkowski	https://doi.org/10.1145/2676723.2691882	FALSE
conf/sigcse/sigcse2015	SIGSCE	2015	705	1	Wednesday Workshops	Making Music with Computers: Creative Programming in Python (Abstract Only).	Bill Z. Manaris; Andrew R. Brown; Tobias Kohn	https://doi.org/10.1145/2676723.2678295	FALSE
conf/sigcse/sigcse2015	SIGSCE	2015	421-423	3	Paper Session: Beyond CS2: OS/Virtualization	MC-Live: A Portable Computing Environment for Computer Science Students.	Lee Wittenberg	https://doi.org/10.1145/2676723.2677216	FALSE
conf/sigcse/sigcse2015	SIGSCE	2015	720	1	Back Matter Items	Minding the Gap Between Blocks-Based and Text-Based Programming (Abstract Only).	David Weintrop	https://doi.org/10.1145/2676723.2693622	FALSE
conf/sigcse/sigcse2015	SIGSCE	2015	689	1	Poster Session II	MIPSUnit: A Unit Testing Framework for MIPS Assembly (Abstract Only).	Zachary Kurmas; Jack Rosenhauer	https://doi.org/10.1145/2676723.2691926	FALSE
conf/sigcse/sigcse2015	SIGSCE	2015	599	1	Demonstration Session	MIST, The Mathematical Image Synthesis Toolkit.	Eileen Fordham; Halley Freger; Amanda Hinchman-Dominguez; Alexander Mitchell; Daniel Rebelsky; Victoria Tsou; Earnest Wheeler; Zoe Wolter; Samuel A. Rebelsky	https://doi.org/10.1145/2676723.2691878	FALSE
conf/sigcse/sigcse2015	SIGSCE	2015	512	1	Lightning Talk Session	Montessori Methods + A Living Textbook > Traditional CS Instruction (Abstract Only).	Nicole Anderson; Tim Gegg-Harrison	https://doi.org/10.1145/2676723.2691879	FALSE
conf/sigcse/sigcse2015	SIGSCE	2015	676	1	Poster Session I	Moving Ahead with Undergraduate Computational Science Programs (Abstract Only).	Lori Carter; Tim Little; Claire Mathews	https://doi.org/10.1145/2676723.2691950	FALSE
conf/sigcse/sigcse2015	SIGSCE	2015	716	1	Undergraduate & Graduate Abstract	NeuroSoccer: Neural Network Q-Learning (Abstract Only).	Andrew Keenan	https://doi.org/10.1145/2676723.2693633	FALSE
conf/sigcse/sigcse2015	SIGSCE	2015	698	1	Birds of a Feather Flock II	New Concepts in Database System Education: Experiences and Ideas (Abstract Only).	Carsten Kleiner	https://doi.org/10.1145/2676723.2691835	FALSE
conf/sigcse/sigcse2015	SIGSCE	2015	673-674	2	Special Session	Nifty Assignments.	Nick Parlante; Julie Zelenski; Peter-Michael Osera; Marty Stepp; Mark Sherriff; Luther A. Tychonievich; Ryan Layer; Suzanne J. Matthews; Allison Obourn; David R. Raymond; Josh Hug; Stuart Reges	https://doi.org/10.1145/2676723.2677327	FALSE
conf/sigcse/sigcse2015	SIGSCE	2015	691	1	Poster Session II	Oh, Snap! Enabling and Encouraging Success in CS1 (Abstract Only).	Michael Ball; Lauren Mock; Jonathan McKinsey; Zachary MacHardy; Daniel D. Garcia; Nathaniel Titterton; Brian Harvey	https://doi.org/10.1145/2676723.2691947	FALSE
conf/sigcse/sigcse2015	SIGSCE	2015	707	1	Friday Workshops	On Beyond Sudoku: Pencil Puzzles for Introductory Computer Science (Abstract Only).	Zack Butler; Ivona Bezáková	https://doi.org/10.1145/2676723.2678299	FALSE
conf/sigcse/sigcse2015	SIGSCE	2015	520-521	2	Panel Session	One-Day Activities for K-12 Face-to-Face Outreach.	Daniel D. Garcia; Wei Ding; Joseph Paul Cohen; Barbara Ericson; Jeff Gray; Dale Reed	https://doi.org/10.1145/2676723.2677337	FALSE
conf/sigcse/sigcse2015	SIGSCE	2015	701	1	Birds of a Feather Flock II	Open Educational Resources: What Next? (Abstract Only).	Lillian (Boots) Cassel; Cynthia Lee; Clifford A. Shaffer; Darina Dicheva	https://doi.org/10.1145/2676723.2691850	FALSE
conf/sigcse/sigcse2015	SIGSCE	2015	174-175	2	Panel Session	Panel on Flipped Classrooms.	Jesse M. Heines; Jeffrey L. Popyack; Briana Morrison; Kate Lockwood; Doug Baldwin	https://doi.org/10.1145/2676723.2677328	FALSE
conf/sigcse/sigcse2015	SIGSCE	2015	717	1	Undergraduate & Graduate Abstract	Parallel Author Verification of E-mail (Abstract Only).	Andreas Kellas; Alexander Molnar; Leo St. Amour; Frederick Ulrich; Suzanne J. Matthews	https://doi.org/10.1145/2676723.2693634	FALSE
conf/sigcse/sigcse2015	SIGSCE	2015	700	1	Birds of a Feather Flock II	Partnering to Promote State-by-State Computing Education Reform (Abstract Only).	W. Richards Adrion; Mark Guzdial; Barbara Ericson	https://doi.org/10.1145/2676723.2691845	FALSE
conf/sigcse/sigcse2015	SIGSCE	2015	2	1	Keynote Address	Paying Back and Paying Forward.	Frank H. Young	https://doi.org/10.1145/2676723.2694802	FALSE
conf/sigcse/sigcse2015	SIGSCE	2015	698	1	Birds of a Feather Flock II	Perspectives on How Computer Science Curricula 2013 Influences Two-Year College Programs (Abstract Only).	Cindy S. Tucker; Cara Tang; Elizabeth K. Hawthorne	https://doi.org/10.1145/2676723.2691833	FALSE
conf/sigcse/sigcse2015	SIGSCE	2015	702	1	Birds of a Feather Flock II	Preparing Undergraduates to Make the Most of Attending CS Conferences (Abstract Only).	Janet Davis; Christine Alvarado; Miranda C. Parker; Jennelle Nystrom	https://doi.org/10.1145/2676723.2691858	FALSE
conf/sigcse/sigcse2015	SIGCSE	2015	522-527	6	Paper Session: Testing: Student Programming Errors	37 Million Compilations: Investigating Novice Programming Mistakes in Large-Scale Student Data.	Amjad AlTadmri; Neil C. C. Brown	https://doi.org/10.1145/2676723.2677258	TRUE
conf/sigcse/sigcse2015	SIGSCE	2015	693	1	Birds of a Feather Flock I	Process Oriented Guided Inquiry Learning (POGIL) in Computer Science (Abstract Only).	Clif Kussmaul; Helen H. Hu; Chris Mayfield	https://doi.org/10.1145/2676723.2691846	FALSE
conf/sigcse/sigcse2015	SIGCSE	2015	338-343	6	Paper Session: Beyond CS2: Cloud Computing	A Cloud Computing Course: From Systems to Services.	M. Suhail Rehman; Jason Boles; Mohammad Hammoud; Majd F. Sakr	https://doi.org/10.1145/2676723.2677298	TRUE
conf/sigcse/sigcse2015	SIGCSE	2015	150-155	6	Paper Session: CS1/CS2: Themed Approaches	A Data Programming CS1 Course.	Ruth E. Anderson; Michael D. Ernst; Robert Ordóñez; Paul Pham; Ben Tribelhorn	https://doi.org/10.1145/2676723.2677309	TRUE
conf/sigcse/sigcse2015	SIGSCE	2015	698	1	Birds of a Feather Flock II	Proposed ABET Computer Science Criteria and the CS2013 Curriculum (Abstract Only).	Michael Oudshoorn; Stan Thomas; Barbara Boucher Owens; Deborah Anne Trytten; Mary Jane Willshire	https://doi.org/10.1145/2676723.2691831	FALSE
conf/sigcse/sigcse2015	SIGCSE	2015	156-161	6	Paper Session: Beyond CS2: Programming Languages/Compilers	A Descent into the Maelstrom: Teaching Legacy Programming and Re-engineering.	Michael Wirth	https://doi.org/10.1145/2676723.2677213	TRUE
conf/sigcse/sigcse2015	SIGSCE	2015	712	1	Saturday Workshops	Puzzle-Based Learning: Introducing Creative Thinking and Problem Solving for Computer Science and Engineering (Abstract Only).	Raja Sooriamurthi; Nickolas J. G. Falkner; Ed Meyer; Zbigniew Michalewicz	https://doi.org/10.1145/2676723.2678301	FALSE
conf/sigcse/sigcse2015	SIGCSE	2015	162-167	6	Paper Session: Beyond CS2: Programming Languages/Compilers	A Framework for Teaching Programming Languages.	Kent D. Lee	https://doi.org/10.1145/2676723.2677245	TRUE
conf/sigcse/sigcse2015	SIGCSE	2015	380-385	6	Paper Session: Focus on K-12: Professional Development	A Mid-Project Report on a Statewide Professional Development Model for CS Principles.	Jeffrey G. Gray; Kathleen Haynie; Sheryl Packman; Mary Boehm; Carol Crawford; Deepa Muralidhar	https://doi.org/10.1145/2676723.2677306	TRUE
conf/sigcse/sigcse2015	SIGSCE	2015	687	1	Poster Session II	Raspberry HadooPI: A Low-Cost, Hands-On Laboratory in Big Data and Analytics (Abstract Only).	Kenneth Fox; William M. Mongan; Jeffrey Popyack	https://doi.org/10.1145/2676723.2691908	FALSE
conf/sigcse/sigcse2015	SIGSCE	2015	628-632	5	Paper Session: Focus on K-12: Miscellaneous topics	Reactive Game Engine Programming for STEM Outreach.	Alan Cleary; Lucas Vandenbergh; John Peterson	https://doi.org/10.1145/2676723.2677312	FALSE
conf/sigcse/sigcse2015	SIGSCE	2015	716	1	Undergraduate & Graduate Abstract	Real Time Occupancy Notification: A Comparison Between Passive Infrared and iBeacon Implementations (Abstract Only).	Brandon Gottlob	https://doi.org/10.1145/2676723.2693631	FALSE
conf/sigcse/sigcse2015	SIGSCE	2015	416-420	5	Paper Session: Testing: Improving Quality of Student Testing	Reconsidering Automated Feedback: A Test-Driven Approach.	Kevin Buffardi; Stephen H. Edwards	https://doi.org/10.1145/2676723.2677313	FALSE
conf/sigcse/sigcse2015	SIGCSE	2015	36-41	6	Paper Session: Curriculum	A Module-based Approach to Adopting the 2013 ACM Curricular Recommendations on Parallel Computing.	Martin Burtscher; Wuxu Peng; Apan Qasem; Hongchi Shi; Dan Tamir; Heather Thiry	https://doi.org/10.1145/2676723.2677270	TRUE
conf/sigcse/sigcse2015	SIGCSE	2015	622-627	6	Paper Session: Focus on K-12: Miscellaneous topics	A Practical Guide to Developing and Validating Computer Science Knowledge Assessments with Application to Middle School.	Philip Sheridan Buffum; Eleni V. Lobene; Megan Hardy Frankosky; Kristy Elizabeth Boyer; Eric N. Wiebe; James C. Lester	https://doi.org/10.1145/2676723.2677295	TRUE
conf/sigcse/sigcse2015	SIGCSE	2015	657-662	6	Paper Session: Beyond CS2: Networking/Security	A Simple Laboratory Environment for Real-World Offensive Security Education.	Maxim Timchenko; David Starobinski	https://doi.org/10.1145/2676723.2677225	TRUE
conf/sigcse/sigcse2015	SIGSCE	2015	348-349	2	Panel Session	Research, Resources and Communities: Informal Ed as a Partner in Computer Science Education.	Cameron L. Fadjo; Betsy James DiSalvo; Irene Lee; Karen Peterson	https://doi.org/10.1145/2676723.2677329	FALSE
conf/sigcse/sigcse2015	SIGSCE	2015	694	1	Birds of a Feather Flock I	Resources and Strategies for Flipped Classrooms (Abstract Only).	Edward F. Gehringer; Mark S. Hall	https://doi.org/10.1145/2676723.2691848	FALSE
conf/sigcse/sigcse2015	SIGCSE	2015	581-586	6	Paper Session: Focus on K-12: Outreach/Summer Camps	A Socio-Cognitive Analysis of Summer Camp Outcomes and Experiences.	Chulakorn Aritajati; Mary Beth Rosson; Joslenne Pena; Dana Cinque; Ana Segura	https://doi.org/10.1145/2676723.2677292	TRUE
conf/sigcse/sigcse2015	SIGSCE	2015	711	1	Saturday Workshops	Reviewing NSF Proposals: Learn about Effective Proposal Writing via the Review Process (Abstract Only).	Michael Erlinger; Paul Tymann	https://doi.org/10.1145/2676723.2678288	FALSE
conf/sigcse/sigcse2015	SIGSCE	2015	593-594	2	Special Session	Scaling High School Computer Science: Exploring Computer Science and Computer Science Principles.	Owen L. Astrachan; Ralph Morelli; Gail Chapman; Jeffrey G. Gray	https://doi.org/10.1145/2676723.2677322	FALSE
conf/sigcse/sigcse2015	SIGSCE	2015	687	1	Poster Session II	Security Injections 2.0: Using Segmentation, Instant-feedback, and Auto-grading to Enhance Secure Coding Modules for Lower-level Programming Courses (Abstract Only).	Sagar Raina; Blair Taylor; Siddharth Kaza	https://doi.org/10.1145/2676723.2691905	FALSE
conf/sigcse/sigcse2015	SIGSCE	2015	704	1	Wednesday Workshops	SEED Labs: Using Hands-on Lab Exercises for Computer Security Education (Abstract Only).	Wenliang Du	https://doi.org/10.1145/2676723.2678290	FALSE
conf/sigcse/sigcse2015	SIGSCE	2015	719	1	Back Matter Items	Selecting the Optimal Hardware Prefetching Algorithm for Parallel Workloads (Abstract Only).	Saami Rahman	https://doi.org/10.1145/2676723.2693618	FALSE
conf/sigcse/sigcse2015	SIGSCE	2015	718	1	Undergraduate & Graduate Abstract	Selection in 3D Graphics Enviornments (Abstract Only).	Lindsey Press	https://doi.org/10.1145/2676723.2693638	FALSE
conf/sigcse/sigcse2015	SIGSCE	2015	715-714	0	Birds of a Feather Flock II	Sharing Best Practices for Alumni Engagement (Abstract Only).	Meghan Allen; Ben Coleman; Diane Horton; Lynn Lambert; Michele Ng	https://doi.org/10.1145/2676723.2691839	FALSE
conf/sigcse/sigcse2015	SIGSCE	2015	702	1	Birds of a Feather Flock II	SIGCSE Reads: Time for Book Discussion (Abstract Only).	Rebecca Bates; Judy Goldsmith; Valerie Summet	https://doi.org/10.1145/2676723.2691861	FALSE
conf/sigcse/sigcse2015	SIGSCE	2015	719	1	Back Matter Items	Situating Computational Thinking with Big Data: Pedagogy and Technology (Abstract Only).	Austin Cory Bart	https://doi.org/10.1145/2676723.2693616	FALSE
conf/sigcse/sigcse2015	SIGSCE	2015	708	1	Friday Workshops	Small or Liberal Arts Colleges Adapting to CS2013: Making It Work (Abstract Only).	Andrea Danyluk; Michael J. Jipping; Rhys Price Jones; David Reed; Brad Richards; Richard Wicentowski	https://doi.org/10.1145/2676723.2678303	FALSE
conf/sigcse/sigcse2015	SIGSCE	2015	691	1	Poster Session II	Smartwatches For Junior/Senior Level CS Education (Abstract Only).	Andrey Esakia	https://doi.org/10.1145/2676723.2691941	FALSE
conf/sigcse/sigcse2015	SIGCSE	2015	469-474	6	Paper Session: Focus on K-12: Engaging Students	An Analysis of User Engagement in Relation to Computing Workshop Activities.	Rachel Menzies; Michael Crabb; Daniel Herron; Karen E. Petrie; Craig Stewart; Mark Zarb	https://doi.org/10.1145/2676723.2677272	TRUE
conf/sigcse/sigcse2015	SIGCSE	2015	663-668	6	Paper Session: Beyond CS2: Networking/Security	An Educational Networking Framework for Full Layer Implementation and Testing.	Keunhong Lee; Joongi Kim; Sue B. Moon	https://doi.org/10.1145/2676723.2677304	TRUE
conf/sigcse/sigcse2015	SIGCSE	2015	197-202	6	Paper Session: Gender & Diversity	An Effective Alternative to the Grace Hopper Celebration.	Gloria Childress Townsend; Kay Sloan	https://doi.org/10.1145/2676723.2677233	TRUE
conf/sigcse/sigcse2015	SIGSCE	2015	516-517	2	Special Session	Special Session: Perspectives on Adopting and Facilitating Guided Inquiry Learning.	Helen H. Hu; Clifton Kussmaul; Deepa Muralidhar; Kristine Nagel	https://doi.org/10.1145/2676723.2677324	FALSE
conf/sigcse/sigcse2015	SIGSCE	2015	714	1	Undergraduate & Graduate Abstract	Speed Estimation Using Computer Vision (Abstract Only).	Matthew Bowen	https://doi.org/10.1145/2676723.2693624	FALSE
conf/sigcse/sigcse2015	SIGSCE	2015	595-596	2	Panel Session	SPOCs: What, Why, and How.	Janet Burge; Armando Fox; Dan Grossman; Gerald Roth; Joe Warren	https://doi.org/10.1145/2676723.2677331	FALSE
conf/sigcse/sigcse2015	SIGCSE	2015	410-415	6	Paper Session: Testing: Improving Quality of Student Testing	An Empirical Study of Iterative Improvement in Programming Assignments.	Raymond Pettit; John Homer; Roger Gee; Susan Mengel; Adam Starbuck	https://doi.org/10.1145/2676723.2677279	TRUE
conf/sigcse/sigcse2015	SIGCSE	2015	500-505	6	Paper Session: Soft Skills: Teamwork	An Experience Report at Teaching a Group Based Agile Software Development Project Course.	Craig Anslow; Frank Maurer	https://doi.org/10.1145/2676723.2677284	TRUE
conf/sigcse/sigcse2015	SIGSCE	2015	708	1	Friday Workshops	Steal This Courseware: FOSS, Github, Python, and OpenShift (Abstract Only).	Remy DeCausemaker; Stephen Jacobs	https://doi.org/10.1145/2676723.2678305	FALSE
conf/sigcse/sigcse2015	SIGSCE	2015	681	1	Poster Session I	STEM Ccareers Inforgaphic Project (SCIP): Teaching Media-Based Computational Thinking Practices (Abstract Only).	Brittany Ann Kos; Elizabeth Sims	https://doi.org/10.1145/2676723.2691934	FALSE
conf/sigcse/sigcse2015	SIGCSE	2015	506-511	6	Paper Session: Soft Skills: Teamwork	An Experience Report: Using Mobile Development To Teach Software Design.	Jennifer Campbell; Anya Tafliovich	https://doi.org/10.1145/2676723.2677307	TRUE
conf/sigcse/sigcse2015	SIGSCE	2015	684	1	Poster Session II	Student Board-Writing to Integrate Communication Skills and Content to Enhance Student Learning (Abstract Only).	Mark E. Hoffman	https://doi.org/10.1145/2676723.2691890	FALSE
conf/sigcse/sigcse2015	SIGSCE	2015	700	1	Birds of a Feather Flock II	Student Contributions to Humanitarian Free and Open Source Software (HFOSS) (Abstract Only).	Lori Postner; Stoney Jackson; Ben Coleman; Suzanne Mello-Stark; Samuel A. Rebelsky	https://doi.org/10.1145/2676723.2691844	FALSE
conf/sigcse/sigcse2015	SIGSCE	2015	685	1	Poster Session II	Student Discovery of Network Security Ethics (Abstract Only).	Alisa Neeman; Michael Snider; Allen Hudson	https://doi.org/10.1145/2676723.2691894	FALSE
conf/sigcse/sigcse2015	SIGCSE	2015	18-23	6	Paper Session: CS Education Research	Analyzing Student Work Patterns Using Programming Exercise Data.	Jaime Spacco; Paul Denny; Brad Richards; David Babcock; David Hovemeyer; James Moscola; Robert C. Duvall	https://doi.org/10.1145/2676723.2677297	TRUE
conf/sigcse/sigcse2015	SIGCSE	2015	368-373	6	Paper Session: Focus on K-12: Professional Development	Analyzing Year One of a CS Principles PD Project.	Ralph Morelli; Chinma Uche; Pauline Lake; Lawrence Baldwin	https://doi.org/10.1145/2676723.2677265	TRUE
conf/sigcse/sigcse2015	SIGCSE	2015	488-493	6	Paper Session: Testing: Tools & Techniques	Ante Up: A Framework to Strengthen Student-Based Testing of Assignments.	Michael K. Bradshaw	https://doi.org/10.1145/2676723.2677247	TRUE
conf/sigcse/sigcse2015	SIGSCE	2015	682	1	Poster Session I	Students' (Mis)Understanding of Dictionaries (Abstract Only).	Emily Stansbury	https://doi.org/10.1145/2676723.2691937	FALSE
conf/sigcse/sigcse2015	SIGCSE	2015	102-107	6	Paper Session: Gender & Diversity	Are Females Disinclined to Tinker in Computer Science?	Samantha Krieger; Meghan Allen; Catherine Rawn	https://doi.org/10.1145/2676723.2677296	TRUE
conf/sigcse/sigcse2015	SIGSCE	2015	699	1	Birds of a Feather Flock II	Study Abroad Experiences in Computer Science (Abstract Only).	Michael Goldweber	https://doi.org/10.1145/2676723.2691837	FALSE
conf/sigcse/sigcse2015	SIGSCE	2015	678	1	Poster Session I	Summer Programming Boot Camp: A Strategy For Retaining Women In IT (Abstract Only).	Sonal Dekhane; Kristine S. Nagel; Nannette P. Napier	https://doi.org/10.1145/2676723.2691924	FALSE
conf/sigcse/sigcse2015	SIGCSE	2015	66-71	6	Paper Session: Beyond CS2: Miscellaneous Topics	Augmenting Undergraduate Computer Science Education With Programmable Smartwatches.	Andrey Esakia; Shuo Niu; D. Scott McCrickard	https://doi.org/10.1145/2676723.2677285	TRUE
conf/sigcse/sigcse2015	SIGSCE	2015	710	1	Saturday Workshops	Supporting New Adopters to Peer Instruction in Computing (Abstract Only).	Daniel Zingaro; Leo Porter; Quintin I. Cutts; John Glick; Joe Hummel; Cynthia Bailey Lee; Jaime Spacco	https://doi.org/10.1145/2676723.2678287	FALSE
conf/sigcse/sigcse2015	SIGCSE	2015	30-35	6	Paper Session: Curriculum	Backward Design: An Integrated Approach to a Systems Curriculum.	Michael S. Kirkpatrick; Mohamed Aboutabl; David Bernstein; Sharon Simmons	https://doi.org/10.1145/2676723.2677264	TRUE
conf/sigcse/sigcse2015	SIGSCE	2015	269-270	2	Panel Session	Supporting the Computer Science Learning Process.	Amy Briggs; David Bau; Caroline Meeks; Pat Yongpradit	https://doi.org/10.1145/2676723.2677334	FALSE
conf/sigcse/sigcse2015	SIGCSE	2015	284-289	6	Paper Session: Student Engagement: Self Explanation	Benefits of Self-explanation in Introductory Programming.	Arto Vihavainen; Craig S. Miller; Amber Settle	https://doi.org/10.1145/2676723.2677260	TRUE
conf/sigcse/sigcse2015	SIGCSE	2015	212-217	6	Paper Session: Student Engagement: Flipped Classroom	Beyond the Flipped Classroom: Learning by Doing Through Challenges and Hack-a-thons.	Michael Skirpan; Tom Yeh	https://doi.org/10.1145/2676723.2677224	TRUE
conf/sigcse/sigcse2015	SIGCSE	2015	398-403	6	Paper Session: Student Engagement: Active Learning	Blending Problem- and Project-Based Learning in Internet of Things Education: Case Greenhouse Maintenance.	Hanna Mäenpää; Sasu Tarkoma; Samu Varjonen; Arto Vihavainen	https://doi.org/10.1145/2676723.2677262	TRUE
conf/sigcse/sigcse2015	SIGSCE	2015	695	1	Birds of a Feather Flock I	Teaching Algebra and Computing through Bootstrap and Program by Design (Abstract Only).	Emmanuel Schanzer; Kathi Fisler	https://doi.org/10.1145/2676723.2691860	FALSE
conf/sigcse/sigcse2015	SIGSCE	2015	704	1	Wednesday Workshops	Teaching Computer Science Soft Skills (Abstract Only).	Orit Hazzan; Gadi Har-Shai	https://doi.org/10.1145/2676723.2678289	FALSE
conf/sigcse/sigcse2015	SIGCSE	2015	482-487	6	Paper Session: Testing: Tools & Techniques	Bug Infestation!: A Goal-Plan Analysis of CS2 Students' Recursive Binary Tree Solutions.	Laurie Murphy; Sue Fitzgerald; Scott Grissom; Renée McCauley	https://doi.org/10.1145/2676723.2677232	TRUE
conf/sigcse/sigcse2015	SIGSCE	2015	704	1	Wednesday Workshops	Teaching Computing Foundations to Non-Majors (Abstract Only).	Catherine C. Bareiss; Larry Vail	https://doi.org/10.1145/2676723.2678283	FALSE
conf/sigcse/sigcse2015	SIGSCE	2015	710	1	Saturday Workshops	Teaching Computing with Processing, the Bridge Between High School and College (Abstract Only).	Aaron Cadle; Ira Greenberg; Deepak Kumar; Darby Thompson; Ursula Wolz; Dianna Xu	https://doi.org/10.1145/2676723.2678286	FALSE
conf/sigcse/sigcse2015	SIGSCE	2015	707	1	Friday Workshops	Teaching Cryptography and Access Control Hands-On (Abstract Only).	Steve Carr; Melissa S. Keranen; Jean Mayo	https://doi.org/10.1145/2676723.2678296	FALSE
conf/sigcse/sigcse2015	SIGCSE	2015	633-638	6	Paper Session: Computers & Society	Building CS Research Capacity in sub-Saharan Africa by Implementing a Doctoral Training Program.	Mikko Apiola; Jarkko Suhonen; Abbi Nangawe; Erkki Sutinen	https://doi.org/10.1145/2676723.2677242	TRUE
conf/sigcse/sigcse2015	SIGCSE	2015	144-149	6	Paper Session: CS1/CS2: Themed Approaches	Building Worlds: Bridging Imperative-First and Object-Oriented Programming in CS1-CS2.	Zoë J. Wood; Aaron W. Keen	https://doi.org/10.1145/2676723.2677249	TRUE
conf/sigcse/sigcse2015	SIGSCE	2015	690	1	Poster Session II	Teaching Debugging Skills in Shader-Based Computer Graphics Programming (Abstract Only).	Ying Zhu; G. Scott Owen	https://doi.org/10.1145/2676723.2691939	FALSE
conf/sigcse/sigcse2015	SIGCSE	2015	404-409	6	Paper Session: Testing: Improving Quality of Student Testing	Can the Security Mindset Make Students Better Testers?	Sara Hooshangi; Richard S. Weiss; Justin Cappos	https://doi.org/10.1145/2676723.2677268	TRUE
conf/sigcse/sigcse2015	SIGCSE	2015	563-568	6	Paper Session: Non-majors/Interdisciplinary	Can We "Flip" Non-Major Programming Courses Yet?	Douglas Baldwin	https://doi.org/10.1145/2676723.2677271	TRUE
conf/sigcse/sigcse2015	SIGSCE	2015	705	1	Wednesday Workshops	Teaching Introductory Computer Science for a Diverse Student Body: Girls Who Code Style (Abstract Only).	Jeff Stern; Ashley Gavin; Kari Bancrof	https://doi.org/10.1145/2676723.2678291	FALSE
conf/sigcse/sigcse2015	SIGSCE	2015	704	1	Wednesday Workshops	Teaching Parallel & Distributed Computing with MPI (Abstract Only).	Joel C. Adams; Richard A. Brown; Elizabeth Shoop	https://doi.org/10.1145/2676723.2678285	FALSE
conf/sigcse/sigcse2015	SIGSCE	2015	713	1	Saturday Workshops	Teaching Privacy: What Every Student Needs to Know (Abstract Only).	Gerald Friedland; Serge Egelman; Daniel D. Garcia	https://doi.org/10.1145/2676723.2678308	FALSE
conf/sigcse/sigcse2015	SIGSCE	2015	695	1	Birds of a Feather Flock I	Teaching Security Using Hands-on Exercises in 2015 (Abstract Only).	Richard S. Weiss; Michael E. Locasto; Jens Mache; Blair Taylor; Elizabeth K. Hawthorne; Justin Cappos; Ambareen Siraj	https://doi.org/10.1145/2676723.2691862	FALSE
conf/sigcse/sigcse2015	SIGSCE	2015	678	1	Poster Session I	Teaching Text-based Programming in a Blocks-based World (Abstract Only).	David Weintrop; Uri Wilensky; Jennifer Roscoe; Daniel Law	https://doi.org/10.1145/2676723.2691923	FALSE
conf/sigcse/sigcse2015	SIGCSE	2015	534-539	6	Paper Session: Testing: Student Programming Errors	Checked Coverage and Object Branch Coverage: New Alternatives for Assessing Student-Written Tests.	Zalia Shams; Stephen H. Edwards	https://doi.org/10.1145/2676723.2677300	TRUE
conf/sigcse/sigcse2015	SIGSCE	2015	694	1	Birds of a Feather Flock I	Teaching Track Faculty in CS (Abstract Only).	Mark Sherriff; Daniel D. Garcia	https://doi.org/10.1145/2676723.2691852	FALSE
conf/sigcse/sigcse2015	SIGCSE	2015	43816	6	Paper Session: CS Education Research	Closing The Cyberlearning Loop: Enabling Teachers To Formatively Assess Student Programming Projects.	Ashok Ram Basawapatna; Alexander Repenning; Kyu Han Koh	https://doi.org/10.1145/2676723.2677269	TRUE
conf/sigcse/sigcse2015	SIGSCE	2015	597-598	2	Panel Session	Technology We Can't Live Without!	Daniel D. Garcia; Eric Allatta; Manuel A. Pérez-Quiñones; Jeff Solin	https://doi.org/10.1145/2676723.2677336	FALSE
conf/sigcse/sigcse2015	SIGSCE	2015	718	1	Undergraduate & Graduate Abstract	The Backbone Project (Abstract Only).	Dharmin Shah	https://doi.org/10.1145/2676723.2693640	FALSE
conf/sigcse/sigcse2015	SIGCSE	2015	120-125	6	Paper Session: Non-majors/Interdisciplinary	Computer Scientists at the Biology Lab Bench.	Andrea Tartaro; Renee J. Chosed	https://doi.org/10.1145/2676723.2677246	TRUE
conf/sigcse/sigcse2015	SIGSCE	2015	669-670	2	Special Session	The CS Concept Inventory Quiz Show.	Nafeesa Dewji; Steven A. Wolfman; Geoffrey L. Herman; Leo Porter; Cynthia Taylor; Jan Vahrenhold	https://doi.org/10.1145/2676723.2677315	FALSE
conf/sigcse/sigcse2015	SIGCSE	2015	296-301	6	Paper Session: Focus on K-12: Professional Development	Computing on the Silicon Prairie: The State of CS in Nebraska Public Schools.	Brian Dorn; Derek Babb; Dawn M. Nizzi; Cory M. Epler	https://doi.org/10.1145/2676723.2677261	TRUE
conf/sigcse/sigcse2015	SIGSCE	2015	224-228	5	Paper Session: Student Engagement: Flipped Classroom	The Effectiveness of Video Quizzes in a Flipped Class.	Lisa L. Lacher; Mark C. Lewis	https://doi.org/10.1145/2676723.2677302	FALSE
conf/sigcse/sigcse2015	SIGSCE	2015	686	1	Poster Session II	The Effects of Formal Undergraduate Research Experiences on Student Aspirations for Graduate Study in Computer Science (Abstract Only): Explaining the Relative Influence of Racial Identity Status.	Ama Nyame-Mensah	https://doi.org/10.1145/2676723.2691903	FALSE
conf/sigcse/sigcse2015	SIGCSE	2015	441-446	6	Paper Session: CS Education Research	Correlation of Topic Model and Student Grades Using Comment Data Mining.	Shaymaa E. Sorour; Kazumasa Goda; Tsunenori Mine	https://doi.org/10.1145/2676723.2677259	TRUE
conf/sigcse/sigcse2015	SIGCSE	2015	42-47	6	Paper Session: CS1/CS2: Focus on CS1	Creating a Computer Simulator as a CS1 Student Project.	Kian L. Pokorny	https://doi.org/10.1145/2676723.2677210	TRUE
conf/sigcse/sigcse2015	SIGSCE	2015	694	1	Birds of a Feather Flock I	The Great Objective-C Swift Migration of 2015 (Abstract Only).	Michael P. Rogers; William M. Siever	https://doi.org/10.1145/2676723.2691849	FALSE
conf/sigcse/sigcse2015	SIGSCE	2015	709	1	Friday Workshops	The Internet, Creativity and Global Impact: Curriculum Modules for the New AP Computer Science Principles Course (Abstract Only).	Lien Diaz; Richard Kick; Andrew Kuemmel	https://doi.org/10.1145/2676723.2678306	FALSE
conf/sigcse/sigcse2015	SIGSCE	2015	514	1	Lightning Talk Session	The Need for Voices in CS to Address the #GamerGate Controversy (Abstract Only).	Joseph Kendall-Morwick	https://doi.org/10.1145/2676723.2691888	FALSE
conf/sigcse/sigcse2015	SIGSCE	2015	688	1	Poster Session II	The State of CS Circles: Open Source and Outreach with an Introductory Python Website (Abstract Only).	David Pritchard; Sandy Graham; Troy Vasiga	https://doi.org/10.1145/2676723.2691910	FALSE
conf/sigcse/sigcse2015	SIGCSE	2015	126-131	6	Paper Session: Non-majors/Interdisciplinary	Data Journalism: Lessons Learned While Designing an Interdisciplinary Service Course.	Christopher Plaue; Lindsey R. Cook	https://doi.org/10.1145/2676723.2677263	TRUE
conf/sigcse/sigcse2015	SIGCSE	2015	179-184	6	Paper Session: Block Languages	DBSnap: Learning Database Queries by Snapping Blocks.	Yasin N. Silva; Jaime Chon	https://doi.org/10.1145/2676723.2677220	TRUE
conf/sigcse/sigcse2015	SIGSCE	2015	438-439	2	Special Session	Towards Grand Challenges in Computing Education Across Disciplines.	Lecia J. Barker; Stephen Cooper; Andrew D. McGettrick; Jason Bennett Thatcher; Heikki Topi	https://doi.org/10.1145/2676723.2677326	FALSE
conf/sigcse/sigcse2015	SIGSCE	2015	78-79	2	Special Session	Tutorial: Concurrency with Alice 3 and Java.	Wanda Dann; Dennis Cosgrove; Don Slater	https://doi.org/10.1145/2676723.2677316	FALSE
conf/sigcse/sigcse2015	SIGCSE	2015	235-240	6	Paper Session: CS1/CS2: Persistance and Attitudes	Drop, Fail, Pass, Continue: Persistence in CS1 and Beyond in Traditional and Inverted Delivery.	Diane Horton; Michelle Craig	https://doi.org/10.1145/2676723.2677273	TRUE
conf/sigcse/sigcse2015	SIGCSE	2015	60-65	6	Paper Session: Beyond CS2: Miscellaneous Topics	Embedding Secure Coding Instruction into the IDE: A Field Study in an Advanced CS Course.	Michael Whitney; Heather Richter Lipford; Bill Chu; Jun Zhu	https://doi.org/10.1145/2676723.2677280	TRUE
conf/sigcse/sigcse2015	SIGCSE	2015	464-469	6	Paper Session: Focus on K-12: Engaging Students	Engaging High School Students in Modeling and Simulation through Educational Media.	David R. Musicant; S. Selcen Guzey	https://doi.org/10.1145/2676723.2677237	TRUE
conf/sigcse/sigcse2015	SIGCSE	2015	639-644	6	Paper Session: Computers & Society	Engaging Non-Traditional Students in Computer Science through Socially-Inspired Learning and Sustained Mentoring.	Jennifer Burg; Victor Paúl Pauca; William H. Turkett Jr.; Errin W. Fulp; Samuel S. Cho; Peter Santago; Daniel A. Cañas; H. Donald Gage	https://doi.org/10.1145/2676723.2677266	TRUE
conf/sigcse/sigcse2015	SIGSCE	2015	692	1	Birds of a Feather Flock I	Universal Access to Computing Education (Abstract Only).	Richard E. Ladner; Brianna Blaser; Daniela Marghitu	https://doi.org/10.1145/2676723.2691834	FALSE
conf/sigcse/sigcse2015	SIGSCE	2015	695	1	Birds of a Feather Flock I	Updating the ACM/IEEE 2008 Curriculum in Information Technology (Abstract Only).	Mihaela Sabin; Svetlana Peltsverger; Cara Tang	https://doi.org/10.1145/2676723.2691857	FALSE
conf/sigcse/sigcse2015	SIGSCE	2015	720	1	Back Matter Items	User Interface Design and Agility: Practices for Integration in CS Classrooms (Abstract Only).	Mohammed Seyam	https://doi.org/10.1145/2676723.2693621	FALSE
conf/sigcse/sigcse2015	SIGSCE	2015	720	1	Back Matter Items	Using Active Learning Techniques in Mixed Undergraduate / Graduate Courses (Abstract Only).	Brian P. Railing	https://doi.org/10.1145/2676723.2693619	FALSE
conf/sigcse/sigcse2015	SIGSCE	2015	346-347	2	Panel Session	Using App Inventor in Introductory CS Courses.	Meimei Gao; Julie Johnson; Dale Reed; Cate Sheller; Franklyn A. Turbak	https://doi.org/10.1145/2676723.2677335	FALSE
conf/sigcse/sigcse2015	SIGSCE	2015	683	1	Poster Session I	Using Big Data and BKT to Evaluate Course Resources (Abstract Only).	Zachary MacHardy; Daniel D. Garcia	https://doi.org/10.1145/2676723.2691948	FALSE
conf/sigcse/sigcse2015	SIGSCE	2015	178	1	Demonstration Session	Using BlueJ to Code Java on the Raspberry Pi.	Amjad AlTadmri; Neil C. C. Brown; Michael Kölling	https://doi.org/10.1145/2676723.2691872	FALSE
conf/sigcse/sigcse2015	SIGSCE	2015	715	1	Undergraduate & Graduate Abstract	Using CABECTPortal as a Case Study to Extend the Capabilities of Penetration Testing Tools (Abstract Only).	Derek M. Duchesne	https://doi.org/10.1145/2676723.2693629	FALSE
conf/sigcse/sigcse2015	SIGCSE	2015	569-574	6	Paper Session: Non-majors/Interdisciplinary	Evaluating Pair-Programming for Non-Computer Science Major Students.	Clem O'Donnell; Jim Buckley; Abdulhussain E. Mahdi; John Nelson; Michael English	https://doi.org/10.1145/2676723.2677289	TRUE
conf/sigcse/sigcse2015	SIGSCE	2015	706	1	Friday Workshops	Using Pencil Code to Bridge the Gap between Visual and Text-Based Coding (Abstract Only).	David Bau; Matthew Dawson; Anthony Bau	https://doi.org/10.1145/2676723.2678293	FALSE
conf/sigcse/sigcse2015	SIGSCE	2015	676	1	Poster Session I	Using POGIL Activities to Teach CS Principles to Diverse Students (Abstract Only).	Helen H. Hu	https://doi.org/10.1145/2676723.2691909	FALSE
conf/sigcse/sigcse2015	SIGSCE	2015	688	1	Poster Session II	Using Workflow Technology to Create Scenario-based Workflows for Information Security Education: Scenario-based Workflows (Abstract Only).	Wu He; Ashish Kshirsagar; Alexander Nwala; Yaohang Li	https://doi.org/10.1145/2676723.2691951	FALSE
conf/sigcse/sigcse2015	SIGSCE	2015	718	1	Undergraduate & Graduate Abstract	Web-based Application for Virtual Exercise Regimen (Abstract Only).	Christina Noe	https://doi.org/10.1145/2676723.2693637	FALSE
conf/sigcse/sigcse2015	SIGSCE	2015	693	1	Birds of a Feather Flock I	What Math is the Right Math for Computing? (Abstract Only).	Doug Baldwin; John P. Dougherty	https://doi.org/10.1145/2676723.2691841	FALSE
conf/sigcse/sigcse2015	SIGCSE	2015	272-277	6	Paper Session: Student Engagement: Self Explanation	Expression of Abstraction: Self Explanation in Code Production.	Leigh Ann Sudol-DeLyser	https://doi.org/10.1145/2676723.2677222	TRUE
conf/sigcse/sigcse2015	SIGCSE	2015	253-258	6	Paper Session: Beyond CS2: Algorithms	Fibonacci in The Curriculum: Not Just a Bad Recurrence.	Saad Mneimneh	https://doi.org/10.1145/2676723.2677215	TRUE
conf/sigcse/sigcse2015	SIGCSE	2015	374-379	6	Paper Session: Focus on K-12: Professional Development	Field Experiences in Teaching Computer Science: Course Organization and Reflections.	Lori L. Pollock; Chrystalla Mouza; James Atlas; Terry Harvey	https://doi.org/10.1145/2676723.2677286	TRUE	Undergraduates teaching CS at middle & high school
conf/sigcse/sigcse2015	SIGSCE	2015	703	1	Birds of a Feather Flock II	Working with Undergraduate Teaching Assistants: Best Practices and Lessons Learned (Abstract Only).	Chris Gregg; Colleen M. Lewis	https://doi.org/10.1145/2676723.2691864	FALSE
conf/sigcse/sigcse2015	SIGCSE	2015	218-223	6	Paper Session: Student Engagement: Flipped Classroom	Flipped Classroom Strategies for CS Education.	Mary Lou Maher; Celine Latulipe; Heather Richter Lipford; Audrey Rorrer	https://doi.org/10.1145/2676723.2677252	TRUE
conf/sigcse/sigcse2015	SIGCSE	2015	546-551	6	Paper Session: Focus on K-12: Elementary	Floors and Flexibility: Designing a Programming Environment for 4th-6th Grade Classrooms.	Charlotte Hill; Hilary A. Dwyer; Tim Martinez; Danielle Harlow; Diana Franklin	https://doi.org/10.1145/2676723.2677275	TRUE
conf/sigcse/sigcse2015	SIGCSE	2015	575-580	6	Paper Session: Focus on K-12: Outreach/Summer Camps	From 9 to 90: Engaging Learners of All Ages.	Allison Sauppé; Daniel Szafir; Chien-Ming Huang; Bilge Mutlu	https://doi.org/10.1145/2676723.2677248	TRUE
conf/sigcse/sigcse2015	SIGCSE	2015	314-319	6	Paper Session: Soft Skills: Teamwork & Communication	Further Evaluations of Industry-Inspired Pair Programming Communication Guidelines with Undergraduate Students.	Mark Zarb; Janet Hughes; John Richards	https://doi.org/10.1145/2676723.2677241	TRUE
conf/sigcse/sigcse2015	SIGCSE	2015	278-283	6	Paper Session: Student Engagement: Self Explanation	Generating Practice Questions as a Preparation Strategy for Introductory Programming Exams.	Paul Denny	https://doi.org/10.1145/2676723.2677253	TRUE
conf/sigcse/sigcse2015	SIGCSE	2015	552-557	6	Paper Session: Focus on K-12: Elementary	Getting Started in Teaching and Researching Computer Science in the Elementary Classroom.	Diana Franklin; Charlotte Hill; Hilary A. Dwyer; Ashley Iveland; Alexandria Killian; Danielle Harlow	https://doi.org/10.1145/2676723.2677288	TRUE
conf/sigcse/sigcse2015	SIGCSE	2015	290-295	6	Paper Session: Focus on K-12: Professional Development	Growing a K-12 Community of Practice.	Stephen Cooper; Susan H. Rodger; Madeleine Schep; RoxAnn H. Stalvey; Wanda Dann	https://doi.org/10.1145/2676723.2677255	TRUE
conf/sigcse/sigcse2015	SIGCSE	2015	326-331	6	Paper Session: Beyond CS2: Cloud Computing	Hands-On Network Programming Projects in the Cloud.	Weiying Zhu	https://doi.org/10.1145/2676723.2677257	TRUE
conf/sigcse/sigcse2015	SIGCSE	2015	645-650	6	Paper Session: Computers & Society	How much impact can be made in a week?: Designing Effective International Service Learning Projects for Computing.	Grace Ngai; Stephen C. F. Chan	https://doi.org/10.1145/2676723.2677267	TRUE
conf/sigcse/sigcse2015	SIGCSE	2015	247-252	6	Paper Session: Beyond CS2: Algorithms	Illustrating the Interaction of Algorithms and Data Structures Using the Matching Problem.	Joan M. Lucas	https://doi.org/10.1145/2676723.2677212	TRUE
conf/sigcse/sigcse2015	SIGCSE	2015	386-391	6	Paper Session: Student Engagement: Active Learning	Integrating Role-Playing Games into Computer Science Courses as a Pedagogical Tool.	David Toth; Mary Kayler	https://doi.org/10.1145/2676723.2677236	TRUE
conf/sigcse/sigcse2015	SIGCSE	2015	132-137	6	Paper Session: Non-majors/Interdisciplinary	Introducing Computing Concepts to Non-Majors: A Case Study in Gothic Novels.	Heather Bort; Mimi Czarnik; Dennis Brylow	https://doi.org/10.1145/2676723.2677308	TRUE
conf/sigcse/sigcse2015	SIGCSE	2015	185-190	6	Paper Session: Block Languages	Language Migration in non-CS Introductory Programming through Mutual Language Translation Environment.	Yoshiaki Matsuzawa; Takashi Ohata; Manabu Sugiura; Sanshiro Sakai	https://doi.org/10.1145/2676723.2677230	TRUE
conf/sigcse/sigcse2015	SIGCSE	2015	528-533	6	Paper Session: Testing: Student Programming Errors	Looking Glass: A C++ Library for Testing Student Programs through Reflection.	Scott Alexander Turner	https://doi.org/10.1145/2676723.2677281	TRUE
conf/sigcse/sigcse2015	SIGCSE	2015	651-656	6	Paper Session: Beyond CS2: Networking/Security	Lowering the Barrier to Systems-level Networking Projects.	Joel Sommers	https://doi.org/10.1145/2676723.2677211	TRUE
conf/sigcse/sigcse2015	SIGCSE	2015	96-101	6	Paper Session: Automated Assessment	Mechanical TA: Partially Automated High-Stakes Peer Grading.	James R. Wright; Chris Thornton; Kevin Leyton-Brown	https://doi.org/10.1145/2676723.2677278	TRUE
conf/sigcse/sigcse2015	SIGCSE	2015	430-435	6	Paper Session: Beyond CS2: OS/Virtualization	MiniOS: An Instructional Platform for Teaching Operating Systems Projects.	Rafael Román Otero; Alex A. Aravind	https://doi.org/10.1145/2676723.2677299	TRUE
conf/sigcse/sigcse2015	SIGCSE	2015	494-499	6	Paper Session: Soft Skills: Teamwork	On the Evaluation of Student Team Software Development Projects.	Anya Tafliovich; Andrew Petersen; Jennifer Campbell	https://doi.org/10.1145/2676723.2677223	TRUE
conf/sigcse/sigcse2015	SIGCSE	2015	610-615	6	Paper Session: Teaching Practices	Personalized Attention @ Scale: Talk Isn't Cheap, But It's Effective.	Dirk Grunwald; Elizabeth Boese; Rhonda Hoenigman; Andy Sayler; Judith A. Stafford	https://doi.org/10.1145/2676723.2677283	TRUE
conf/sigcse/sigcse2015	SIGCSE	2015	48-53	6	Paper Session: CS1/CS2: Focus on CS1	Program Decomposition and Complexity in CS1.	Aaron W. Keen; Kurt Mammen	https://doi.org/10.1145/2676723.2677219	TRUE
conf/sigcse/sigcse2015	SIGCSE	2015	259-264	6	Paper Session: Beyond CS2: Algorithms	Randomized Reduction.	Brian C. Dean; Raghuveer Mohan; Chad G. Waters	https://doi.org/10.1145/2676723.2677251	TRUE
conf/sigcse/sigcse2015	SIGCSE	2015	229-234	6	Paper Session: CS1/CS2: Persistance and Attitudes	Reconsidering the Impact of CS1 on Novice Attitudes.	Amber Settle; John Lalor; Theresa Steinbach	https://doi.org/10.1145/2676723.2677235	TRUE
conf/sigcse/sigcse2015	SIGCSE	2015	350-355	6	Paper Session: CS Education Research	Recursion vs. Iteration: An Empirical Study of Comprehension Revisited.	Renée A. McCauley; Brian Hanks; Sue Fitzgerald; Laurie Murphy	https://doi.org/10.1145/2676723.2677227	TRUE
conf/sigcse/sigcse2015	SIGCSE	2015	191-196	6	Paper Session: Block Languages	Scratch: A Way to Logo and Python.	Mark Dorling; Dave White	https://doi.org/10.1145/2676723.2677256	TRUE
conf/sigcse/sigcse2015	SIGCSE	2015	72-77	6	Paper Session: Beyond CS2: Miscellaneous Topics	Simulating IBM Watson in the Classroom.	Wlodek Zadrozny; Sean Gallagher; Walid Shalaby; Adarsh Avadhani	https://doi.org/10.1145/2676723.2677287	TRUE
conf/sigcse/sigcse2015	SIGCSE	2015	452-457	6	Paper Session: CS Education Research	SOLO Taxonomy for Assessing Novices' Algorithmic Design.	David Ginat; Eti Menashe	https://doi.org/10.1145/2676723.2677311	TRUE
conf/sigcse/sigcse2015	SIGCSE	2015	138-143	6	Paper Session: CS1/CS2: Themed Approaches	Statistics-infused Introduction to Computer Science.	Olaf A. Hall-Holt; Kevin R. Sanft	https://doi.org/10.1145/2676723.2677218	TRUE
conf/sigcse/sigcse2015	SIGCSE	2015	114-119	6	Paper Session: Gender & Diversity	StitchFest: Diversifying a College Hackathon to Broaden Participation and Perceptions in Computing.	Gabriela T. Richard; Yasmin B. Kafai; Barrie M. Adleberg; Orkan Telhan	https://doi.org/10.1145/2676723.2677310	TRUE
conf/sigcse/sigcse2015	SIGCSE	2015	392-397	6	Paper Session: Student Engagement: Active Learning	Structuring Flipped Classes with Lightweight Teams and Gamification.	Celine Latulipe; N. Bruce Long; Carlos E. Seminario	https://doi.org/10.1145/2676723.2677240	TRUE
conf/sigcse/sigcse2015	SIGCSE	2015	43627	6	Paper Session: CS Education Research	Student Response to Teaching of Memory Cues and Resumption Strategies in Computer Science Classes.	Noah John; Jaime Ruiz	https://doi.org/10.1145/2676723.2677234	TRUE
conf/sigcse/sigcse2015	SIGCSE	2015	54-59	6	Paper Session: CS1/CS2: Focus on CS1	Supporting Creativity and User Interaction in CS 1 Homework Assignments.	Tammy VanDeGrift	https://doi.org/10.1145/2676723.2677250	TRUE
conf/sigcse/sigcse2015	SIGCSE	2015	302-307	6	Paper Session: Focus on K-12: Professional Development	Supporting CS10K: A New Computer Science Methods Course for Mathematics Education Students.	Robin Y. Flatland; Darren Lim; James R. Matthews; Scott VandenBerg	https://doi.org/10.1145/2676723.2677274	TRUE
conf/sigcse/sigcse2015	SIGCSE	2015	320-325	6	Paper Session: Soft Skills: Teamwork & Communication	Supporting Programming Assignments with Activity Streams: An Empirical Study.	Christopher D. Hundhausen; Adam S. Carter; Olusola O. Adesope	https://doi.org/10.1145/2676723.2677276	TRUE
conf/sigcse/sigcse2015	SIGCSE	2015	24-29	6	Paper Session: Curriculum	Teaching Computing as Science in a Research Experience.	Jerod J. Weinman; David D. Jensen; David Lopatto	https://doi.org/10.1145/2676723.2677231	TRUE
conf/sigcse/sigcse2015	SIGCSE	2015	332-337	6	Paper Session: Beyond CS2: Cloud Computing	Teaching Cybersecurity Analysis Skills in the Cloud.	Richard S. Weiss; Stefan Boesen; James F. Sullivan; Michael E. Locasto; Jens Mache; Erik Nilsen	https://doi.org/10.1145/2676723.2677290	TRUE
conf/sigcse/sigcse2015	SIGCSE	2015	424-429	6	Paper Session: Beyond CS2: OS/Virtualization	Teaching Virtualization by Building a Hypervisor.	Abhinand Palicherla; Tao Zhang; Donald E. Porter	https://doi.org/10.1145/2676723.2677254	TRUE
conf/sigcse/sigcse2015	SIGCSE	2015	362-367	6	Paper Session: CS Education Research	The Effectiveness of Visualization for Learning Expression Evaluation.	Amruth N. Kumar	https://doi.org/10.1145/2676723.2677301	TRUE
conf/sigcse/sigcse2015	SIGCSE	2015	108-113	6	Paper Session: Gender & Diversity	The Emerging Role of Self-Perception in Student Intentions.	Jennifer Dempsey; Richard T. Snodgrass; Isabel Kishi; Allison Titcomb	https://doi.org/10.1145/2676723.2677305	TRUE
conf/sigcse/sigcse2015	SIGCSE	2015	168-173	6	Paper Session: Beyond CS2: Programming Languages/Compilers	The Interpreter In An Undergraduate Compilers Course.	John H. E. Lasseter	https://doi.org/10.1145/2676723.2677314	TRUE
conf/sigcse/sigcse2015	SIGCSE	2015	90-95	6	Paper Session: Automated Assessment	The Role of Automation in Undergraduate Computer Science Education.	Chris Wilcox	https://doi.org/10.1145/2676723.2677226	TRUE
conf/sigcse/sigcse2015	SIGCSE	2015	241-246	6	Paper Session: CS1/CS2: Persistance and Attitudes	Towards Incremental Separation of Surmountable and Insurmountable Programming Difficulties.	Jason Carter; Prasun Dewan; Mauro Pichiliani	https://doi.org/10.1145/2676723.2677294	TRUE
conf/sigcse/sigcse2015	SIGCSE	2015	356-361	6	Paper Session: CS Education Research	Tracking Student Learning from Class to Exam using Isomorphic Questions.	Daniel Zingaro; Leo Porter	https://doi.org/10.1145/2676723.2677239	TRUE
conf/sigcse/sigcse2015	SIGCSE	2015	616-621	6	Paper Session: Focus on K-12: Miscellaneous topics	Transferring Skills at Solving Word Problems from Computing to Algebra Through Bootstrap.	Emmanuel Schanzer; Kathi Fisler; Shriram Krishnamurthi; Matthias Felleisen	https://doi.org/10.1145/2676723.2677238	TRUE
conf/sigcse/sigcse2015	SIGCSE	2015	475-480	6	Paper Session: Testing: Tools & Techniques	Unci: a C++-based Unit-testing Framework for Intro Students.	Don Blaheta	https://doi.org/10.1145/2676723.2677228	TRUE
conf/sigcse/sigcse2015	SIGCSE	2015	308-313	6	Paper Session: Soft Skills: Teamwork & Communication	Using a Message Board as a Teaching Tool in an Introductory Cyber-Security Course.	Raymond Greenlaw; Christopher Brown; Zachary Dannelly; Andrew Phillips; Sarah Standard	https://doi.org/10.1145/2676723.2677221	TRUE
conf/sigcse/sigcse2015	SIGCSE	2015	540-545	6	Paper Session: Focus on K-12: Elementary	Using SOLO to Classify the Programming Responses of Primary Grade Students.	Linda M. Seiter	https://doi.org/10.1145/2676723.2677244	TRUE
conf/sigcse/sigcse2015	SIGCSE	2015	84-89	6	Paper Session: Automated Assessment	WebWolf: Towards a Simple Framework for Automated Assessment of Webpage Assignments in an Introductory Web Programming Class.	Antonio Carvalho Siochi; William Randall Hardy	https://doi.org/10.1145/2676723.2677217	TRUE
conf/sigcse/sigcse2015	SIGCSE	2015	458-463	6	Paper Session: Focus on K-12: Engaging Students	What Does It Take to Do Computer Programming?: Surveying the K-12 Students' Conceptions.	Antti-Jussi Lakanen; Ville Isomöttönen	https://doi.org/10.1145/2676723.2677229	TRUE
conf/sigcse/sigcse2015	SIGCSE	2015	604-609	6	Paper Session: Teaching Practices	What Influences CS Faculty to Adopt Teaching Practices?	Lecia Barker; Christopher Lynnly Hovey; Jane Gruning	https://doi.org/10.1145/2676723.2677282	TRUE
conf/sigcse/sigcse2016	SIGSCE	2016	496-497	2	Lightning Talk Session	A "Grand Tour" of Computer Science: Re-Designing CS1 for Breadth and Retention (Abstract Only).	Natalie Linnell; Nicholas Tran	https://doi.org/10.1145/2839509.2850521	FALSE
conf/sigcse/sigcse2016	SIGSCE	2016	494-495	2	Lightning Talk Session	A Body of Knowledge for Usable Security and Privacy Education (Abstract Only).	Yousra Javed; Heather Richter Lipford	https://doi.org/10.1145/2839509.2850517	FALSE
conf/sigcse/sigcse2016	SIGSCE	2016	687-688	2	Poster Session I	A Certification-Guided Course for Cloud Computing (Abstract Only).	Dahai Guo; Anna Koufakou	https://doi.org/10.1145/2839509.2850539	FALSE
conf/sigcse/sigcse2016	SIGSCE	2016	685-686	2	Poster Session I	A Holistic Sequence of Programming Assignments for CS2 (Abstract Only).	Joanna Klukowska; Stewart N. Weiss	https://doi.org/10.1145/2839509.2850532	FALSE
conf/sigcse/sigcse2016	SIGSCE	2016	681-682	2	Special Session	Advanced Placement Computer Science Principles (APCSP): A Report from Teachers.	Owen L. Astrachan; Rebecca Brook Osborne	https://doi.org/10.1145/2839509.2844677	FALSE
conf/sigcse/sigcse2016	SIGSCE	2016	394-395	2	Special Session	AP Computer Science and Service Learning with We.org.	Sandra Czajka; Lien Diaz; Crystal Furman	https://doi.org/10.1145/2839509.2844676	FALSE
conf/sigcse/sigcse2016	SIGSCE	2016	485-489	5	Paper Session: Beale St. Sampler	Assessing the Tier-1 Core Learning Outcomes of CS2013.	James W. McGuffee; E. Kent Palmer; Indira R. Guzman	https://doi.org/10.1145/2839509.2844613	FALSE
conf/sigcse/sigcse2016	SIGSCE	2016	688	1	Poster Session I	Automated Analysis of Student Programmer Coding Behavior Patterns (Abstract Only).	Corey Ford; Clinton Staley	https://doi.org/10.1145/2839509.2850540	FALSE
conf/sigcse/sigcse2016	SIGSCE	2016	398-399	2	Panel Session	Booming Enrollments: Survey Data.	Tracy Camp; Stuart H. Zweben; Duncan Buell; Jane Stout	https://doi.org/10.1145/2839509.2844663	FALSE
conf/sigcse/sigcse2016	SIGSCE	2016	590	1	Demonstration Session	Bringing Real-World Data And Visualizations Into Data Structures Courses Using BRIDGES.	Kalpathi R. Subramanian; Jamie Payton; David Burlinson; Mihai Mehedint	https://doi.org/10.1145/2839509.2850512	FALSE
conf/sigcse/sigcse2016	SIGSCE	2016	242	1	Demonstration Session	CodeSnaps: Block-Based Robotic Programming for the Low-Budget Classroom.	Jennifer Sabourin; Lucy Kosturko; Scott W. McQuiggan	https://doi.org/10.1145/2839509.2850508	FALSE
conf/sigcse/sigcse2016	SIGSCE	2016	686	1	Poster Session I	Coding, Designing, and Logistics: How Modes Affect Equity in Computer Science Education (Abstract Only).	Declan Andrew McClintock; Niral Shah	https://doi.org/10.1145/2839509.2850534	FALSE
conf/sigcse/sigcse2016	SIGSCE	2016	1	1	Keynote Address	Cognitive Load Theory and Computer Science Education.	John Sweller	https://doi.org/10.1145/2839509.2844549	FALSE
conf/sigcse/sigcse2016	SIGSCE	2016	496	1	Lightning Talk Session	Collaborative Learning Eliminates the Negative Impact of Gender Stereotypes on Women's Self-Concept (Abstract Only).	Jane Stout; Burçin Tamer	https://doi.org/10.1145/2839509.2850515	FALSE
conf/sigcse/sigcse2016	SIGSCE	2016	686	1	Poster Session I	Combating Perceptions of Computer Scientists: A Short-term Intervention (Abstract Only).	Shaundra Bryant Daily; Alison E. Leonard; Sophie Jörg; Sabarish V. Babu; Nikeetha D'Souza; Dhaval Parmar; Kara Gundersen; Joseph Isaac; Serita Acker	https://doi.org/10.1145/2839509.2850533	FALSE
conf/sigcse/sigcse2016	SIGSCE	2016	494	1	Lightning Talk Session	Complexity Tutor: Developing an Interactive Tutoring System for Computational Complexity (Abstract Only).	Mark McCartin-Lim	https://doi.org/10.1145/2839509.2850524	FALSE
conf/sigcse/sigcse2016	SIGSCE	2016	494	1	Lightning Talk Session	Computational Making (Abstract Only).	Jennifer A. Rode; Andrea Marshall; Houda el Mimouni; Jennifer Booker	https://doi.org/10.1145/2839509.2850522	FALSE
conf/sigcse/sigcse2016	SIGSCE	2016	242	1	Demonstration Session	Creating and Grading IPython/Jupyter Notebook Assignments with NbGrader.	Jessica B. Hamrick	https://doi.org/10.1145/2839509.2850507	FALSE
conf/sigcse/sigcse2016	SIGSCE	2016	495	1	Lightning Talk Session	Crossing the Streams: Exploring the Interplay between Students' Online Social Activity and Programming Behavior (Abstract Only).	Adam S. Carter; Christopher D. Hundhausen	https://doi.org/10.1145/2839509.2850519	FALSE
conf/sigcse/sigcse2016	SIGSCE	2016	3	1	Keynote Address	CS Education: Catching the Wave.	Jan Cuny	https://doi.org/10.1145/2839509.2844551	FALSE
conf/sigcse/sigcse2016	SIGSCE	2016	396-397	2	Panel Session	CS10K Teachers by 2017?: Try CS1K+ students NOW! Coping with the Largest CS1 Courses in History.	Daniel D. Garcia; Jennifer Campbell; John DeNero; Mary Lou Dorf; Stuart Reges	https://doi.org/10.1145/2839509.2844660	FALSE
conf/sigcse/sigcse2016	SIGSCE	2016	158-159	2	Special Session	Demystifying Computing with Magic, part III.	Daniel D. Garcia; David Ginat	https://doi.org/10.1145/2839509.2844679	FALSE
conf/sigcse/sigcse2016	SIGSCE	2016	400	1	Demonstration Session	Education Modules for Networking, Cloud Computing, and Security in Systems Courses.	Jay Aikat; Michael K. Reiter; Kevin Jeffay	https://doi.org/10.1145/2839509.2850514	FALSE
conf/sigcse/sigcse2016	SIGSCE	2016	78-79	2	Panel Session	Engaging CS Alumni from Afar.	Christine Ann Shannon; James Kiper; Samuel A. Rebelsky; Janet Davis	https://doi.org/10.1145/2839509.2844662	FALSE
conf/sigcse/sigcse2016	SIGSCE	2016	496	1	Lightning Talk Session	Enhancing Teaching of Big Data by Using Real World Datasets.	Anurag Nagar	https://doi.org/10.1145/2839509.2850516	FALSE
conf/sigcse/sigcse2016	SIGSCE	2016	321-322	2	Panel Session	How to Use Open Source Software in Education.	Judith Bishop; Carlos Jensen; Walt Scacchi; Arfon Smith	https://doi.org/10.1145/2839509.2844665	FALSE
conf/sigcse/sigcse2016	SIGSCE	2016	238-239	2	Panel Session	igniteCS: Addressing Undergraduate CS Retention.	Erin Mindell Cannon; Priya Chawla; Katherine Lo; Haley Adams	https://doi.org/10.1145/2839509.2844658	FALSE
conf/sigcse/sigcse2016	SIGSCE	2016	687	1	Poster Session I	Increasing Security Awareness in Undergraduate Courses with Labware (Abstract Only).	Michael Weeks; Yi Pan; Yanqing Zhang	https://doi.org/10.1145/2839509.2850536	FALSE
conf/sigcse/sigcse2016	SIGSCE	2016	240-241	2	Special Session	Instructional Design is to Teaching as Software Engineering is to Programming.	Austin Cory Bart; Clifford A. Shaffer	https://doi.org/10.1145/2839509.2844674	FALSE
conf/sigcse/sigcse2016	SIGSCE	2016	685	1	Poster Session I	Integrating Sustainability Concepts into Introductory Programming Courses (Abstract Only).	Jeffrey A. Stone	https://doi.org/10.1145/2839509.2850527	FALSE
conf/sigcse/sigcse2016	SIGSCE	2016	223-227	5	Paper Session: Scratch	ITCH: Individual Testing of Computer Homework for Scratch Assignments.	David E. Johnson	https://doi.org/10.1145/2839509.2844600	FALSE
conf/sigcse/sigcse2016	SIGSCE	2016	341-345	5	Paper Session: Novel Learning Approaches	Just-In-Time Learning for the Just Google It Era.	Elizabeth Boese	https://doi.org/10.1145/2839509.2844583	FALSE
conf/sigcse/sigcse2016	SIGSCE	2016	4	1	Keynote Address	Lean In to the Evidence: Breaking the "Glass Slipper" of Technical Professions.	Karen Lee Ashcraft	https://doi.org/10.1145/2839509.2846011	FALSE
conf/sigcse/sigcse2016	SIGSCE	2016	686	1	Poster Session I	Lights, Camera, but No Action: Exploring Affective Audio-Visual Features of Educational Videos (Abstract Only).	Abhay Doke; Niranjan Pedanekar	https://doi.org/10.1145/2839509.2850535	FALSE
conf/sigcse/sigcse2016	SIGSCE	2016	588-589	2	Special Session	Nifty Assignments.	Nick Parlante; Julie Zelenski; Baker Franke; Arvind Bhusnurmath; Karen Her; Kristen Gee; Eric Manley; Timothy Urness; Marvin Zhang; Brian Hou; John DeNero; Josh Hug; Kevin Wayne	https://doi.org/10.1145/2839509.2844678	FALSE
conf/sigcse/sigcse2016	SIGSCE	2016	400	1	Demonstration Session	OnRamp to Parallel and Distributed Computing: Web-portal for Teaching Parallel and Distributed Computing.	Samantha S. Foley; Joshua Hursey	https://doi.org/10.1145/2839509.2850511	FALSE
conf/sigcse/sigcse2016	SIGSCE	2016	5	1	Demonstration Session	OpenDSA: An Interactive eTextbook for Computer Science Courses.	Clifford A. Shaffer	https://doi.org/10.1145/2839509.2850505	FALSE
conf/sigcse/sigcse2016	SIGSCE	2016	5	1	Demonstration Session	OSBLE+: A Next-Generation Learning Management and Analytics Environment for Computing Education.	Daniel M. Olivares; Christopher D. Hundhausen	https://doi.org/10.1145/2839509.2850509	FALSE
conf/sigcse/sigcse2016	SIGSCE	2016	160-161	2	Panel Session	Panel: Engage in Reasoning with Tools.	Gregory Kulczycki; Murali Sitaraman; Nigamanth Sridhar; Bruce W. Weide	https://doi.org/10.1145/2839509.2844657	FALSE
conf/sigcse/sigcse2016	SIGSCE	2016	315-316	2	Panel Session	Panel: Future Directions of Block-based Programming.	Neil C. C. Brown; Jens Mönig; Anthony Bau; David Weintrop	https://doi.org/10.1145/2839509.2844661	FALSE
conf/sigcse/sigcse2016	SIGSCE	2016	590	1	Demonstration Session	ParseIT: A Tool for Teaching Parsing Techniques.	Amey Karkare; Nimisha Agrawal	https://doi.org/10.1145/2839509.2850513	FALSE
conf/sigcse/sigcse2016	SIGCSE	2016	564-569	6	Paper Session: Computing in Middle School	"What Is A Computer": What do Secondary School Students Think?	Shuchi Grover; Daisy Rutstein; Eric Snow	https://doi.org/10.1145/2839509.2844579	TRUE
conf/sigcse/sigcse2016	SIGCSE	2016	120-125	6	Paper Session: CS Ed Research 1	A (Updated) Review of Empiricism at the SIGCSE Technical Symposium.	Ahmed Al-Zubidy; Jeffrey C. Carver; Sarah Heckman; Mark Sherriff	https://doi.org/10.1145/2839509.2844601	TRUE
conf/sigcse/sigcse2016	SIGCSE	2016	323-328	6	Paper Session: Problem Solving	A Course on Programming and Problem Solving.	Swapneel Sheth; Christian Murphy; Kenneth A. Ross; Dennis E. Shasha	https://doi.org/10.1145/2839509.2844594	TRUE
conf/sigcse/sigcse2016	SIGCSE	2016	370-375	6	Paper Session: CS Ed Research 2	A Data-Driven Analysis of Informatively Hard Concepts in Introductory Programming.	R. Paul Wiegand; Anthony Bucci; Amruth N. Kumar; Jennifer L. Albert; Alessio Gaspar	https://doi.org/10.1145/2839509.2844629	TRUE
conf/sigcse/sigcse2016	SIGSCE	2016	497	1	Lightning Talk Session	Raising the Awareness of Accessibility Needs in Block Languages (Abstract Only).	Amber Wagner; Jeff Gray; Daniela Marghitu; Andreas Stefik	https://doi.org/10.1145/2839509.2850525	FALSE
conf/sigcse/sigcse2016	SIGCSE	2016	358-363	6	Paper Session: CS Ed Research 2	A Multi-institutional Study of Peer Instruction in Introductory Computing.	Leo Porter; Dennis J. Bouvier; Quintin I. Cutts; Scott Grissom; Cynthia Bailey Lee; Robert McCartney; Daniel Zingaro; Beth Simon	https://doi.org/10.1145/2839509.2844642	TRUE
conf/sigcse/sigcse2016	SIGSCE	2016	80-81	2	Panel Session	Rediscovering the Passion, Beauty, Joy, and Awe: Making Computing Fun Again, part 8.	Daniel D. Garcia; Josh Caldwell; Pamela Fox; Jeremy Keeshin	https://doi.org/10.1145/2839509.2844659	FALSE
conf/sigcse/sigcse2016	SIGCSE	2016	570-575	6	Paper Session: Games	A Multidisciplinary, Multifaceted Approach to Improve the Computer Science based Game Design Education: Methodology and Assessment.	Chang Yun; Hesam Panahi; Zhigang Deng	https://doi.org/10.1145/2839509.2844582	TRUE
conf/sigcse/sigcse2016	SIGCSE	2016	169-174	6	Paper Session: Big Data	A Practical and Sustainable Model for Learning and Teaching Data Science.	Bina Ramamurthy	https://doi.org/10.1145/2839509.2844603	TRUE
conf/sigcse/sigcse2016	SIGCSE	2016	609-614	6	Paper Session: Alternative Learning Experiences	A Programming Contest Strategy Guide.	Aaron Bloomfield; Borja Sotomayor	https://doi.org/10.1145/2839509.2844632	TRUE
conf/sigcse/sigcse2016	SIGCSE	2016	597-602	6	Paper Session: Security	A Reflective Approach to Assessing Student Performance in Cybersecurity Exercises.	Richard S. Weiss; Michael E. Locasto; Jens Mache	https://doi.org/10.1145/2839509.2844646	TRUE
conf/sigcse/sigcse2016	SIGCSE	2016	443-448	6	Paper Session: Software Testing	A Strategy to Combine Test-Driven Development and Test Criteria to Improve Learning of Programming Skills.	Bruno Henrique Pachulski Camara; Marco Aurélio Graciotto Silva	https://doi.org/10.1145/2839509.2844633	TRUE
conf/sigcse/sigcse2016	SIGCSE	2016	30-35	6	Paper Session: Computational Thinking	A Study on the Impact of Multidisciplinary Collaboration on Computational Thinking.	Sarah Monisha Pulimood; Kim Pearson; Diane C. Bates	https://doi.org/10.1145/2839509.2844636	TRUE
conf/sigcse/sigcse2016	SIGCSE	2016	479-484	6	Paper Session: Beale St. Sampler	A Survey of Ethical Agreements in Information Security Courses.	Benedict Chukuka; Michael Locasto	https://doi.org/10.1145/2839509.2844580	TRUE
conf/sigcse/sigcse2016	SIGSCE	2016	319-320	2	Panel Session	Scrum and Agile Methods in Software Engineering Courses.	Jennifer Campbell; Stan Kurkovsky; Chun Wai Liew; Anya Tafliovich	https://doi.org/10.1145/2839509.2844664	FALSE
conf/sigcse/sigcse2016	SIGSCE	2016	2	1	Keynote Address	Service as Rent.	Barbara Boucher Owens	https://doi.org/10.1145/2839509.2844550	FALSE
conf/sigcse/sigcse2016	SIGCSE	2016	522-527	6	Paper Session: Out-of-school Activities	Agile Software Development Study Away.	Maureen Doyle; Candace Gibson; Michelle Melish; Rees Storm	https://doi.org/10.1145/2839509.2844571	TRUE
conf/sigcse/sigcse2016	SIGCSE	2016	425-430	6	Paper Session: International Perspectives	Alice in the Middle East: An Experience Report from the Formative Phase.	Saquib Razak; Huda Gedawy; Wanda Dann; Donald J. Slater	https://doi.org/10.1145/2839509.2844593	TRUE
conf/sigcse/sigcse2016	SIGSCE	2016	496	1	Lightning Talk Session	Social Network Analysis as a Tool for Understanding Student Interaction in Project-based Courses (Abstract Only).	Bonnie K. MacKellar	https://doi.org/10.1145/2839509.2850520	FALSE
conf/sigcse/sigcse2016	SIGCSE	2016	126-131	6	Paper Session: CS Ed Research 1	An Effective Approach to Enhancing Compiler Error Messages.	Brett A. Becker	https://doi.org/10.1145/2839509.2844584	TRUE
conf/sigcse/sigcse2016	SIGSCE	2016	234-235	2	Special Session	Special Session: ACM Joint Task Force on Cyber Education.	Diana Burley; Matt Bishop; Elizabeth K. Hawthorne; Siddharth Kaza; Scott Buck; Lynn Futcher	https://doi.org/10.1145/2839509.2844672	FALSE
conf/sigcse/sigcse2016	SIGSCE	2016	683-684	2	Special Session	Special Session: Helping Students to Develop Communication, Teamwork, and Other Process Skills with POGIL.	Clifton Kussmaul; Helen H. Hu; Tammy Pirmann	https://doi.org/10.1145/2839509.2844673	FALSE
conf/sigcse/sigcse2016	SIGSCE	2016	688	1	Poster Session I	SPOCK: A System for Encouraging Interaction in Small Private Online Courses (Abstract Only).	Ryan Hardt; Grant Wuerker	https://doi.org/10.1145/2839509.2850541	FALSE
conf/sigcse/sigcse2016	SIGCSE	2016	48-53	6	Paper Session: Research on Learning	An Examination of Layers of Quizzing in Two Computer Systems Courses.	Cindy Norris	https://doi.org/10.1145/2839509.2844608	TRUE
conf/sigcse/sigcse2016	SIGCSE	2016	455-460	6	Paper Session: CS Principles	An Experience Report Assessing A Professional Development MOOC For CS Principles.	Jeff Gray; Jonathan Corley; Brian P. Eddy	https://doi.org/10.1145/2839509.2844654	TRUE
conf/sigcse/sigcse2016	SIGCSE	2016	540-545	6	Paper Session: Classroom Techniques	Animated Examples as Practice Content in a Java Programming Course.	Roya Hosseini; Teemu Sirkiä; Julio Guerra; Peter Brusilovsky; Lauri Malmi	https://doi.org/10.1145/2839509.2844639	TRUE
conf/sigcse/sigcse2016	SIGCSE	2016	102-107	6	Paper Session: Engagement and Diversity	Applying the Communal Goal Congruity Perspective to Enhance Diversity and Inclusion in Undergraduate Computing Degrees.	Bo Brinkman; Amanda Diekman	https://doi.org/10.1145/2839509.2844562	TRUE
conf/sigcse/sigcse2016	SIGCSE	2016	54-59	6	Paper Session: Research on Learning	As CS Enrollments Grow, Are We Attracting Weaker Students?	Mehran Sahami; Chris Piech	https://doi.org/10.1145/2839509.2844621	TRUE
conf/sigcse/sigcse2016	SIGCSE	2016	132-137	6	Paper Session: CS Ed Research 1	Automatic Inference of Programming Performance and Experience from Typing Patterns.	Juho Leinonen; Krista Longi; Arto Klami; Arto Vihavainen	https://doi.org/10.1145/2839509.2844612	TRUE
conf/sigcse/sigcse2016	SIGCSE	2016	18-23	6	Paper Session: Data Structures	BRIDGES: A System to Enable Creation of Engaging Data Structures Assignments with Real-World Data and Visualizations.	David Burlinson; Mihai Mehedint; Chris Grafer; Kalpathi R. Subramanian; Jamie Payton; Paula Goolkasian; Michael Youngblood; Robert Kosara	https://doi.org/10.1145/2839509.2844635	TRUE
conf/sigcse/sigcse2016	SIGCSE	2016	199-204	6	Paper Session: Program Design	Can Students Design Software?: The Answer Is More Complex Than You Think.	Chenglie Hu	https://doi.org/10.1145/2839509.2844563	TRUE
conf/sigcse/sigcse2016	SIGCSE	2016	407-412	6	Paper Session: Databases	chidb: Building a Simple Relational Database System from Scratch.	Borja Sotomayor; Adam Shaw	https://doi.org/10.1145/2839509.2844638	TRUE
conf/sigcse/sigcse2016	SIGSCE	2016	236-237	2	Panel Session	Technology We Can't Live Without!, revisited.	Daniel D. Garcia; Leslie Aaronson; Shawn Kenner; Colleen M. Lewis; Susan H. Rodger	https://doi.org/10.1145/2839509.2844668	FALSE
conf/sigcse/sigcse2016	SIGCSE	2016	150-155	6	Paper Session: CS0	Combining Big Data and Thick Data Analyses for Understanding Youth Learning Trajectories in a Summer Coding Camp.	Deborah A. Fields; Lisa Quirke; Janell Amely; Jason Maughan	https://doi.org/10.1145/2839509.2844631	TRUE
conf/sigcse/sigcse2016	SIGCSE	2016	261-266	6	Paper Session: Artistic Approaches	Computational Art: Introducing High School Students to Computing via Art.	Zoë J. Wood; Paul Muhl; Katelyn Hicks	https://doi.org/10.1145/2839509.2844614	TRUE
conf/sigcse/sigcse2016	SIGCSE	2016	24-29	6	Paper Session: Computational Thinking	Computational Thinking as a Liberal Study.	Dave Mason; Irfan Khan; Vadim Farafontov	https://doi.org/10.1145/2839509.2844655	TRUE
conf/sigcse/sigcse2016	SIGCSE	2016	528-533	6	Paper Session: Out-of-school Activities	Computer History on the Move.	Graham Farr; A. Barbara Ainsworth; Chris Avram; Judy Sheard	https://doi.org/10.1145/2839509.2844575	TRUE
conf/sigcse/sigcse2016	SIGSCE	2016	685	1	Poster Session I	The Development of Internationalized Computational Thinking Curriculum in Hong Kong Primary Education (Abstract Only).	Gary K. W. Wong; Kening Zhu; Xiaojuan Ma; John Man Ho Huen	https://doi.org/10.1145/2839509.2850528	FALSE
conf/sigcse/sigcse2016	SIGCSE	2016	657-662	6	Paper Session: K-12 Teaching	Contextualized Teaching in the Lower Secondary EducationLong-term Evaluation of a CS Course from Grade 6 to 10.	Arno Pasternak	https://doi.org/10.1145/2839509.2844592	TRUE
conf/sigcse/sigcse2016	SIGCSE	2016	273-278	6	Paper Session: Artistic Approaches	Creative Computation in High School.	Dianna Xu; Aaron Cadle; Darby Thompson; Ursula Wolz; Ira Greenberg; Deepak Kumar	https://doi.org/10.1145/2839509.2844611	TRUE
conf/sigcse/sigcse2016	SIGSCE	2016	687	1	Poster Session I	The Impact on Student Learning and Satisfaction When a CS2 Course Became Interactive (Abstract Only).	Steven Huss-Lederman	https://doi.org/10.1145/2839509.2850538	FALSE
conf/sigcse/sigcse2016	SIGSCE	2016	82-83	2	Special Session	The Micro-Cluster Showcase: 7 Inexpensive Beowulf Clusters for Teaching PDC.	Joel C. Adams; Jacob Caswell; Suzanne J. Matthews; Charles Peck; Elizabeth Shoop; David Toth; James Wolfer	https://doi.org/10.1145/2839509.2844670	FALSE
conf/sigcse/sigcse2016	SIGCSE	2016	651-656	6	Paper Session: K-12 Teaching	CS Teacher Experiences with Educational Technology, Problem-BasedLearning, and a CS Principles Curriculum.	George Veletsianos; Bradley Beth; Calvin Lin	https://doi.org/10.1145/2839509.2844645	TRUE
conf/sigcse/sigcse2016	SIGCSE	2016	138-143	6	Paper Session: CS0	CS0 for Computer Science Majors at Ohio University.	Cindy Marling; David Juedes	https://doi.org/10.1145/2839509.2844624	TRUE
conf/sigcse/sigcse2016	SIGSCE	2016	162	1	Demonstration Session	The Sensorian Shield: Transforming the Raspberry Pi into an IoT Platform.	Qusay H. Mahmoud; Dhimiter Qendri; Michael Lescisin	https://doi.org/10.1145/2839509.2850510	FALSE
conf/sigcse/sigcse2016	SIGSCE	2016	162	1	Demonstration Session	The Speech Recognition Virtual Kitchen Toolkit.	Rebecca Bates; Euisung Kim	https://doi.org/10.1145/2839509.2850506	FALSE
conf/sigcse/sigcse2016	SIGCSE	2016	615-620	6	Paper Session: Alternative Learning Experiences	Datathons: An Experience Report of Data Hackathons for Data Science Education.	Craig Anslow; John Brosz; Frank Maurer; Mike Boyes	https://doi.org/10.1145/2839509.2844568	TRUE
conf/sigcse/sigcse2016	SIGCSE	2016	72-77	6	Paper Session: Professional Development	Deploying Exploring Computer Science Statewide.	Helen H. Hu; Cecily Heiner; Jay McCarthy	https://doi.org/10.1145/2839509.2844622	TRUE
conf/sigcse/sigcse2016	SIGCSE	2016	576-581	6	Paper Session: Games	Design Insights into the Creation and Evaluation of a Computer Science Educational Game.	Britton Horn; Christopher Clark; Oskar Strom; Hilery Chao; Amy J. Stahl; Casper Harteveld; Gillian Smith	https://doi.org/10.1145/2839509.2844656	TRUE
conf/sigcse/sigcse2016	SIGCSE	2016	364-369	6	Paper Session: CS Ed Research 2	Developing a Computer Science Concept Inventory for Introductory Programming.	Ricardo Caceffo; Steven A. Wolfman; Kellogg S. Booth; Rodolfo Azevedo	https://doi.org/10.1145/2839509.2844559	TRUE
conf/sigcse/sigcse2016	SIGCSE	2016	255-260	6	Paper Session: Peer Techniques	Differences in the Learning Principles Dominating Student-Student vs. Student-Instructor Interactions while Working on Programming Tasks.	Alessio Gaspar; Joni Torsella; Nora Honken; Sohum Sohoni; Colin Arnold	https://doi.org/10.1145/2839509.2844627	TRUE
conf/sigcse/sigcse2016	SIGCSE	2016	376-381	6	Paper Session: K-8 Diversity	Differentiating for Diversity: Using Universal Design for Learning in Elementary Computer Science Education.	Alexandria K. Hansen; Eric R. Hansen; Hilary A. Dwyer; Danielle Boyd Harlow; Diana Franklin	https://doi.org/10.1145/2839509.2844570	TRUE
conf/sigcse/sigcse2016	SIGSCE	2016	156-157	2	Special Session	Training Teachers to Integrate Computational Thinking into K-12 Teaching.	Rania A. HodHod; Shamim Khan; Yesem Kurt-Peker; Lydia Ray	https://doi.org/10.1145/2839509.2844675	FALSE
conf/sigcse/sigcse2016	SIGCSE	2016	504-509	6	Paper Session: Computer Engineering	Droning On: Reflections on Integrating UAV Technology into a Computer Engineering Design Laboratory.	Meriel Huggard; Ciarán Mc Goldrick	https://doi.org/10.1145/2839509.2844650	TRUE
conf/sigcse/sigcse2016	SIGSCE	2016	495	1	Lightning Talk Session	U.S. Army's Cyber Leader Development Program (Abstract Only).	James C. Finocchiaro	https://doi.org/10.1145/2839509.2850518	FALSE
conf/sigcse/sigcse2016	SIGSCE	2016	492-493	2	Panel Session	Uncommon Teaching Languages.	Mark C. Lewis; Douglas Blank; Kim Bruce; Peter-Michael Osera	https://doi.org/10.1145/2839509.2844666	FALSE
conf/sigcse/sigcse2016	SIGCSE	2016	510-515	6	Paper Session: Computer Engineering	Effects of a Program Integrating Course for Students of Computer Science and Engineering.	Viggo Kann; Anna-Karin Högfeldt	https://doi.org/10.1145/2839509.2844610	TRUE
conf/sigcse/sigcse2016	SIGCSE	2016	382-387	6	Paper Session: K-8 Diversity	Empowering All Students: Closing the CS Confidence Gap with an In-School Initiative for Middle School Students.	Philip Sheridan Buffum; Megan Hardy Frankosky; Kristy Elizabeth Boyer; Eric N. Wiebe; Bradford W. Mott; James C. Lester	https://doi.org/10.1145/2839509.2844595	TRUE
conf/sigcse/sigcse2016	SIGCSE	2016	108-113	6	Paper Session: Engagement and Diversity	Enhancing Engagement by Blending Rigor and Relevance.	Sarnath Ramnath; John H. Hoover	https://doi.org/10.1145/2839509.2844554	TRUE
conf/sigcse/sigcse2016	SIGSCE	2016	490-491	2	Special Session	Updating Curricular Guidelines for Associate-Degree Computer Science Programs.	Cara Tang; Cindy S. Tucker; Elizabeth K. Hawthorne	https://doi.org/10.1145/2839509.2844671	FALSE
conf/sigcse/sigcse2016	SIGSCE	2016	495	1	Lightning Talk Session	Using Instant Chat for Fun and for Profit to Run a Large Class (Abstract Only).	Michael A. Ball	https://doi.org/10.1145/2839509.2850526	FALSE
conf/sigcse/sigcse2016	SIGCSE	2016	181-186	6	Paper Session: Teaching with Teams	Evaluating Student Teams: Do Educators Know What Students Think?	Anya Tafliovich; Andrew Petersen; Jennifer Campbell	https://doi.org/10.1145/2839509.2844647	TRUE
conf/sigcse/sigcse2016	SIGCSE	2016	582-587	6	Paper Session: Games	Experiences from an Experiential Learning Course on Games Development.	Stephan Krusche; Barbara Reichart; Paul Tolstoi; Bernd Bruegge	https://doi.org/10.1145/2839509.2844599	TRUE
conf/sigcse/sigcse2016	SIGSCE	2016	687	1	Poster Session I	Visualizing Algorithm Analysis Topics (Abstract Only).	Mohammed F. Farghally; Eric Fouh; Sally Hamouda; Kyu Han Koh; Clifford A. Shaffer	https://doi.org/10.1145/2839509.2850537	FALSE
conf/sigcse/sigcse2016	SIGCSE	2016	193-198	6	Paper Session: Teaching with Teams	Exploring Lightweight Teams in a Distributed Learning Environment.	Stephen MacNeil; Celine Latulipe; N. Bruce Long; Aman Yadav	https://doi.org/10.1145/2839509.2844577	TRUE
conf/sigcse/sigcse2016	SIGCSE	2016	603-608	6	Paper Session: Security	Facilitating a Battle Between Hackers: Computer Security Outside of the Classroom.	Nathan Backman	https://doi.org/10.1145/2839509.2844648	TRUE	Maar zo snel niet te zien of er echt iets gemeten wordt onder studenten
conf/sigcse/sigcse2016	SIGCSE	2016	552-557	6	Paper Session: Computing in Middle School	Factors Influencing Computer Science Learning in Middle School.	Shuchi Grover; Roy D. Pea; Stephen Cooper	https://doi.org/10.1145/2839509.2844564	TRUE
conf/sigcse/sigcse2016	SIGSCE	2016	317-318	2	Panel Session	Why Don't Some CS0 Students Succeed?: How Important Are Background, Experience, Culture, Aptitude, Habits and Attitude?	Daniel D. Garcia; Colleen M. Lewis; Stuart Reges; Nathan L. Ensmenger	https://doi.org/10.1145/2839509.2844667	FALSE
conf/sigcse/sigcse2016	SIGSCE	2016	494	1	Lightning Talk Session	You Wouldn't Know It from SIGCSE Proceedings, but We Don't Only Teach CS1 (Abstract Only).	Colleen M. Lewis	https://doi.org/10.1145/2839509.2850523	FALSE
conf/sigcse/sigcse2016	SIGCSE	2016	346-351	6	Paper Session: Novel Learning Approaches	Hackathons as an Informal Learning Platform.	Arnab Nandi; Meris Mandernach	https://doi.org/10.1145/2839509.2844590	TRUE
conf/sigcse/sigcse2016	SIGCSE	2016	388-393	6	Paper Session: K-8 Diversity	How Early Does the CS Gender Gap Emerge?: A Study of Collaborative Problem Solving in 5th Grade Computer Science.	Jennifer Tsan; Kristy Elizabeth Boyer; Collin F. Lynch	https://doi.org/10.1145/2839509.2844605	TRUE
conf/sigcse/sigcse2016	SIGCSE	2016	279-296	18	Paper Session: Tests and Outcomes	Impact of Student Achievement Goals on CS1 Outcomes.	Daniel Zingaro; Leo Porter	https://doi.org/10.1145/2839509.2844553	TRUE
conf/sigcse/sigcse2016	SIGCSE	2016	66-71	6	Paper Session: Professional Development	Implementation and Outcomes of a Three-Pronged Approach to Professional Development for CS Principles.	Chrystalla Mouza; Lori L. Pollock; Kathleen Pusecker; Kevin Guidry; Ching-Yi Yeh; James Atlas; Terry Harvey	https://doi.org/10.1145/2839509.2844585	TRUE
conf/sigcse/sigcse2016	SIGCSE	2016	534-539	6	Paper Session: Classroom Techniques	Improving Engagement in Introductory Courses with Homework Resubmission.	Amanda M. Holland-Minkley; Thomas E. Lombardi	https://doi.org/10.1145/2839509.2844576	TRUE
conf/sigcse/sigcse2016	SIGCSE	2016	675-680	6	Paper Session: Tools	Incorporating Analogies and Worked Out Examples as Pedagogical Strategies in a Computer Science Tutoring System.	Rachel Harsley; Nick E. Green; Mehrdad Alizadeh; Sabita Acharya; Davide Fossati; Barbara Di Eugenio; Omar AlZoubi	https://doi.org/10.1145/2839509.2844637	TRUE
conf/sigcse/sigcse2016	SIGCSE	2016	217-222	6	Paper Session: Scratch	Initialization in Scratch: Seeking Knowledge Transfer.	Diana Franklin; Charlotte Hill; Hilary A. Dwyer; Alexandria K. Hansen; Ashley Iveland; Danielle Boyd Harlow	https://doi.org/10.1145/2839509.2844569	TRUE
conf/sigcse/sigcse2016	SIGCSE	2016	285-290	6	Paper Session: Tests and Outcomes	Introducing and Evaluating Exam Wrappers in CS2.	Michelle Craig; Diane Horton; Daniel Zingaro; Danny Heap	https://doi.org/10.1145/2839509.2844561	TRUE
conf/sigcse/sigcse2016	SIGCSE	2016	36-41	6	Paper Session: Computational Thinking	Investigating Differences in Wiki-based Collaborative Activities between Student Engagement Profiles in CS1.	Adam Eck; Leen-Kiat Soh; Duane F. Shell	https://doi.org/10.1145/2839509.2844615	TRUE
conf/sigcse/sigcse2016	SIGCSE	2016	297-302	6	Paper Session: High School Diversity	Investigating the Role of Being a Mentor as a Way of Increasing Interest in CS.	Jody Clarke-Midura; Vicki Allan; Kevin Close	https://doi.org/10.1145/2839509.2844581	TRUE
conf/sigcse/sigcse2016	SIGCSE	2016	645-650	6	Paper Session: K-12 Teaching	Landscape of K-12 Computer Science Education in the U.S.: Perceptions, Access, and Barriers.	Jennifer Wang; Hai Hong; Jason Ravitz; Sepehr Hejazi Moghadam	https://doi.org/10.1145/2839509.2844628	TRUE
conf/sigcse/sigcse2016	SIGCSE	2016	467-472	6	Paper Session: CS Principles	Lessons Learned from "BJC" CS Principles Professional Development.	Thomas W. Price; Veronica Cateté; Jennifer Albert; Tiffany Barnes; Daniel D. Garcia	https://doi.org/10.1145/2839509.2844625	TRUE
conf/sigcse/sigcse2016	SIGCSE	2016	291-296	6	Paper Session: Tests and Outcomes	Measuring Effects of Modality on Perceived Test Anxiety for Computer Programming Exams.	Robert Deloatch; Brian P. Bailey; Alex Kirlik	https://doi.org/10.1145/2839509.2844604	TRUE
conf/sigcse/sigcse2016	SIGCSE	2016	516-521	6	Paper Session: Out-of-school Activities	Meeting Graduate Employability Needs through Open-source Collaboration with Industry.	Matthew Forshaw; Ellis Solaiman; Oonagh McGee; Hugo Firth; Paul Robinson; Ryan Emerson	https://doi.org/10.1145/2839509.2844649	TRUE
conf/sigcse/sigcse2016	SIGCSE	2016	546-551	6	Paper Session: Classroom Techniques	Memory Diagrams: A Consistant Approach Across Concepts and Languages.	Toby Dragon; Paul E. Dickson	https://doi.org/10.1145/2839509.2844607	TRUE
conf/sigcse/sigcse2016	SIGCSE	2016	211-216	6	Paper Session: Program Design	Modernizing Plan-Composition Studies.	Kathi Fisler; Shriram Krishnamurthi; Janet Siegmund	https://doi.org/10.1145/2839509.2844556	TRUE
conf/sigcse/sigcse2016	SIGCSE	2016	228-233	6	Paper Session: Scratch	Multi-Track Programming Competitions with Scratch.	Jason Arnold; Heather Bort; Ryan Naugle; Casey O'Hare; Dennis Brylow	https://doi.org/10.1145/2839509.2844634	TRUE
conf/sigcse/sigcse2016	SIGCSE	2016	558-563	6	Paper Session: Computing in Middle School	MyCS at 5: Assessing a Middle-years CS Curriculum.	Brenda Castro; Terrence Diaz; Marissa Gee; Rebekah Justice; David Kwan; Preethi Seshadri; Zachary Dodds	https://doi.org/10.1145/2839509.2844643	TRUE
conf/sigcse/sigcse2016	SIGCSE	2016	90-95	6	Paper Session: Pair Programming	Observations of Pair Programming: Variations in Collaboration Across Demographic Groups.	Omar Ruvalcaba; Linda L. Werner; Jill Denner	https://doi.org/10.1145/2839509.2844558	TRUE
conf/sigcse/sigcse2016	SIGCSE	2016	205-210	6	Paper Session: Program Design	On the Interplay Between Bottom-Up and Datatype-Driven Program Design.	Francisco Enrique Vicente Castro; Kathi Fisler	https://doi.org/10.1145/2839509.2844574	TRUE
conf/sigcse/sigcse2016	SIGCSE	2016	323-328	6	Paper Session: Problem Solving	Online CS1: Who Enrols, Why, and How Do They Do?	Diane Horton; Jennifer Campbell; Michelle Craig	https://doi.org/10.1145/2839509.2844578	TRUE
conf/sigcse/sigcse2016	SIGCSE	2016	43627	6	Paper Session: Data Structures	Paper vs. Computer-based Exams: A Study of Errors in Recursive Binary Tree Algorithms.	Scott Grissom; Laurie Murphy; Renée McCauley; Sue Fitzgerald	https://doi.org/10.1145/2839509.2844587	TRUE
conf/sigcse/sigcse2016	SIGCSE	2016	431-436	6	Paper Session: International Perspectives	Piloting Computer Science Education Week in Mexico.	Nora A. Escherle; Silvia I. Ramirez-Ramirez; Ashok R. Basawapatna; Dorit Assaf; Alexander Repenning; Carmine Maiello; Yasko Ch. Endo; Juan Arturo Nolazco-Flores	https://doi.org/10.1145/2839509.2844598	TRUE
conf/sigcse/sigcse2016	SIGCSE	2016	633-638	6	Paper Session: CS Ed Research 3	Retention of Flow: Evaluating a Computer Science Education Week Activity.	Alexander Repenning; Ashok R. Basawapatna; Dorit Assaf; Carmine Maiello; Nora A. Escherle	https://doi.org/10.1145/2839509.2844597	TRUE
conf/sigcse/sigcse2016	SIGCSE	2016	144-149	6	Paper Session: CS0	Security Injections 2.0: Increasing Ability to Apply Secure Coding Knowledge using Segmented and Interactive Modules in CS0.	Sagar Raina; Siddharth Kaza; Blair Taylor	https://doi.org/10.1145/2839509.2844609	TRUE
conf/sigcse/sigcse2016	SIGCSE	2016	473-478	6	Paper Session: Beale St. Sampler	Seeing Is Believing: Helping Students Visualize Multithreaded Behavior.	Joel C. Adams; Patrick A. Crain; Christopher P. Dilley; Serita M. Nelesen; Javin B. Unger; Mark B. Vander Stel	https://doi.org/10.1145/2839509.2844557	TRUE
conf/sigcse/sigcse2016	SIGCSE	2016	669-674	6	Paper Session: Tools	SEURAT_Edu: A Tool to Assist and Assess Student Decision-Making in Design.	John Malloy; Janet Burge	https://doi.org/10.1145/2839509.2844555	TRUE
conf/sigcse/sigcse2016	SIGCSE	2016	309-314	6	Paper Session: High School Diversity	Sisters Rise Up 4 CS: Helping Female Students Pass the Advanced Placement Computer Science A Exam.	Barbara J. Ericson; Miranda C. Parker; Shelly Engelman	https://doi.org/10.1145/2839509.2844623	TRUE
conf/sigcse/sigcse2016	SIGCSE	2016	413-418	6	Paper Session: Databases	SQL: From Traditional Databases to Big Data.	Yasin N. Silva; Isadora Almeida; Michell Queiroz	https://doi.org/10.1145/2839509.2844560	TRUE
conf/sigcse/sigcse2016	SIGCSE	2016	43816	6	Paper Session: Data Structures	Stay on These Roads: Potential Factors Indicating Students' Performance in a CS2 Course.	Holger Danielsiek; Jan Vahrenhold	https://doi.org/10.1145/2839509.2844591	TRUE
conf/sigcse/sigcse2016	SIGCSE	2016	639-644	6	Paper Session: CS Ed Research 3	Students' Initial Course Motivation and Their Achievement and Retention in College CS1 Courses.	Duane F. Shell; Leen-Kiat Soh; Abraham E. Flanigan; Markeya S. Peteranetz	https://doi.org/10.1145/2839509.2844606	TRUE
conf/sigcse/sigcse2016	SIGCSE	2016	401-406	6	Paper Session: Databases	Students' Syntactic Mistakes in Writing Seven Different Types of SQL Queries and its Application to Predicting Students' Success.	Alireza Ahadi; Vahid Behbood; Arto Vihavainen; Julia Coleman Prior; Raymond Lister	https://doi.org/10.1145/2839509.2844640	TRUE
conf/sigcse/sigcse2016	SIGCSE	2016	42-47	6	Paper Session: Research on Learning	Subgoals Help Students Solve Parsons Problems.	Briana B. Morrison; Lauren E. Margulieux; Barbara Ericson; Mark Guzdial	https://doi.org/10.1145/2839509.2844617	TRUE
conf/sigcse/sigcse2016	SIGCSE	2016	663-668	6	Paper Session: Tools	Supporting Active Learning by Introducing an Interactive Teaching Tool in a Data Structures and Algorithms Course.	Tommy Färnqvist; Fredrik Heintz; Patrick Lambrix; Linda Mannila; Chunyan Wang	https://doi.org/10.1145/2839509.2844653	TRUE
conf/sigcse/sigcse2016	SIGCSE	2016	621-626	6	Paper Session: Alternative Learning Experiences	Teaching "Lawfulness" With Kodu.	David S. Touretzky; Christina Gardner-McCune; Ashish Aggarwal	https://doi.org/10.1145/2839509.2844652	TRUE
conf/sigcse/sigcse2016	SIGCSE	2016	175-180	6	Paper Session: Big Data	Teaching Big Data with a Virtual Cluster.	Joshua Eckroth	https://doi.org/10.1145/2839509.2844651	TRUE
conf/sigcse/sigcse2016	SIGCSE	2016	187-192	6	Paper Session: Teaching with Teams	Teaching Global Software Engineering by Simulating a Global Project in the Classroom.	Yang Li; Stephan Krusche; Christian Lescher; Bernd Bruegge	https://doi.org/10.1145/2839509.2844618	TRUE
conf/sigcse/sigcse2016	SIGCSE	2016	96-101	6	Paper Session: Pair Programming	Teaching Mobile Development with Pair Programming.	Mohammed Seyam; D. Scott McCrickard	https://doi.org/10.1145/2839509.2844644	TRUE
conf/sigcse/sigcse2016	SIGCSE	2016	60-65	6	Paper Session: Professional Development	TEALS: Teacher Professional Development Using Industry Volunteers.	Nathaniel Granor; Leigh Ann DeLyser; Kevin Wang	https://doi.org/10.1145/2839509.2844589	TRUE
conf/sigcse/sigcse2016	SIGCSE	2016	437-442	6	Paper Session: Software Testing	Testing Strategies for the Automated Grading of Student Programs.	Chris Wilcox	https://doi.org/10.1145/2839509.2844616	TRUE
conf/sigcse/sigcse2016	SIGCSE	2016	249-254	6	Paper Session: Peer Techniques	The Effects of Peer- and Self-assessment on the Assessors.	Joonsuk Park; Kimberley Williams	https://doi.org/10.1145/2839509.2844602	TRUE
conf/sigcse/sigcse2016	SIGCSE	2016	329-334	6	Paper Session: Problem Solving	The Influence of Problem Solving Abilities on Students' Performance on Different Assessment Tasks in CS1.	Alex Lishinski; Aman Yadav; Richard J. Enbody; Jon Good	https://doi.org/10.1145/2839509.2844596	TRUE
conf/sigcse/sigcse2016	SIGCSE	2016	267-272	6	Paper Session: Artistic Approaches	The MoveLab: Developing Congruence Between Students' Self-Concepts and Computing.	Kayla DesPortes; Monet Spells; Betsy DiSalvo	https://doi.org/10.1145/2839509.2844586	TRUE
conf/sigcse/sigcse2016	SIGCSE	2016	419-424	6	Paper Session: International Perspectives	The Performance of Female Computer Science Students across Three Caribbean Islands.	Daniel T. Fokum; Daniel N. Coore; Yewande E. Lewis-Fokum	https://doi.org/10.1145/2839509.2844566	TRUE
conf/sigcse/sigcse2016	SIGCSE	2016	243-248	6	Paper Session: Peer Techniques	The Sweep: Essential Examples for In-Flow Peer Review.	Joe Gibbs Politz; Joseph M. Collard; Arjun Guha; Kathi Fisler; Shriram Krishnamurthi	https://doi.org/10.1145/2839509.2844626	TRUE
conf/sigcse/sigcse2016	SIGCSE	2016	591-596	6	Paper Session: Security	The Teaching Privacy Curriculum.	Serge Egelman; Julia Bernd; Gerald Friedland; Dan Garcia	https://doi.org/10.1145/2839509.2844619	TRUE
conf/sigcse/sigcse2016	SIGCSE	2016	352-357	6	Paper Session: Novel Learning Approaches	The Video Collaboratory as a Learning Environment.	Vikash Singh; Sarah Abdellahi; Mary Lou Maher; Celine Latulipe	https://doi.org/10.1145/2839509.2844588	TRUE
conf/sigcse/sigcse2016	SIGCSE	2016	84-89	6	Paper Session: Pair Programming	Three Years of Student Pair Programming: Action Research Insights and Outcomes.	Ian R. McChesney	https://doi.org/10.1145/2839509.2844565	TRUE
conf/sigcse/sigcse2016	SIGCSE	2016	449-454	6	Paper Session: Software Testing	Tool Design and Student Testing Behavior in an Introductory Java Course.	Grant Braught; James Midkiff	https://doi.org/10.1145/2839509.2844641	TRUE
conf/sigcse/sigcse2016	SIGCSE	2016	303-308	6	Paper Session: High School Diversity	Toward More Gender Diversity in CS through an Artificial Intelligence Summer Program for High School Girls.	Marie E. Vachovsky; Grace Wu; Sorathan Chaturapruek; Olga Russakovsky; Richard Sommer; Fei-Fei Li	https://doi.org/10.1145/2839509.2844620	TRUE
conf/sigcse/sigcse2016	SIGCSE	2016	627-632	6	Paper Session: CS Ed Research 3	Towards a Common Framework for Evaluating Computing Outreach Activities.	Adrienne Decker; Monica M. McGill; Amber Settle	https://doi.org/10.1145/2839509.2844567	TRUE
conf/sigcse/sigcse2016	SIGCSE	2016	461-466	6	Paper Session: CS Principles	Two Teachers, Two Perspectives on CS Principles.	Jean Griffin; Tammy Pirmann; Brent Gray	https://doi.org/10.1145/2839509.2844630	TRUE
conf/sigcse/sigcse2016	SIGCSE	2016	498-503	6	Paper Session: Computer Engineering	Undergraduate Assembly Language Instruction Sweetened with the Raspberry Pi.	Jalal Kawash; Andrew Kuipers; Leonard Manzara; Robert Don Collier	https://doi.org/10.1145/2839509.2844552	TRUE
conf/sigcse/sigcse2016	SIGCSE	2016	114-119	6	Paper Session: Engagement and Diversity	Understanding How Research Experiences for Undergraduate Students May Foster Diversity in the Professorate.	Burçin Tamer; Jane G. Stout	https://doi.org/10.1145/2839509.2844573	TRUE
conf/sigcse/sigcse2016	SIGCSE	2016	163-168	6	Paper Session: Big Data	VisMap: Exploratory Visualization Support for Introductory Data Science and Visualization.	Dugald Ralph Hutchings; Megan Squire	https://doi.org/10.1145/2839509.2844572	TRUE
conf/sigcse/sigcse2017	SIGSCE	2017	33-37	5	Papers: Aggarwal -- Broll	A Curriculum Model Featuring Oral Communication Instruction and Practice.	Karen Anewalt; Jennifer A. Polack	https://doi.org/10.1145/3017680.3017775	FALSE
conf/sigcse/sigcse2017	SIGSCE	2017	708	1	Posters: Alphonce -- Haynie	A Final Project Report on CS4Alabama: A Statewide Professional Development Initiative for CS Principles (Abstract Only).	Kathleen Haynie; Jeff Gray; Sheryl Packman; Carol Crawford; Mary Boehm; Jonathan Corley	https://doi.org/10.1145/3017680.3022420	FALSE
conf/sigcse/sigcse2017	SIGSCE	2017	718	1	Posters: Patek -- Zarch	A Flexible Late Day Policy Reduces Stress and Improves Learning (Abstract Only).	Jeramey Tyler; Matthew Peveler; Barbara Cutler	https://doi.org/10.1145/3017680.3022439	FALSE
conf/sigcse/sigcse2017	SIGSCE	2017	718	1	Posters: Patek -- Zarch	A Game-Driven Approach to Teaching Bit Manipulation (Abstract Only).	Paul Voelker; Chris Johnson	https://doi.org/10.1145/3017680.3022404	FALSE
conf/sigcse/sigcse2017	SIGSCE	2017	779-780	2	ACM Student Research Competition -- Undergraduate	A Pathway to Strengthening Support for Beauty and Joy of Computing Teachers.	Meghana Subramaniam; Veronica Cateté	https://doi.org/10.1145/3017680.3022458	FALSE
conf/sigcse/sigcse2017	SIGSCE	2017	731	1	Birds of a Feather: Price -- Yongpradit	A Town Meeting: SIGCSE Committee on Expanding the Women-in-Computing Community (Abstract Only).	Gloria Childress Townsend	https://doi.org/10.1145/3017680.3022343	FALSE
conf/sigcse/sigcse2017	SIGSCE	2017	739	1	Workshops: Heckman -- Martin	A Web-Based IDE for Teaching with Any Language (Abstract Only).	David J. Malan; Nikolai Onken; Dan Armendariz	https://doi.org/10.1145/3017680.3017839	FALSE
conf/sigcse/sigcse2017	SIGSCE	2017	726	1	Birds of a Feather: Hawthorne -- Pollock	Access to Computing Education for Students with Disabilities (Abstract Only).	Richard E. Ladner; Andreas Stefik; Daniela Marghitu	https://doi.org/10.1145/3017680.3022342	FALSE
conf/sigcse/sigcse2017	SIGSCE	2017	701	1	Lightning Talks	Accessibility as a First-Class Concern in Teaching GUIs and Software Engineering (Abstract Only).	Joel Ross; Andrew J. Ko; David L. Stearns	https://doi.org/10.1145/3017680.3022393	FALSE
conf/sigcse/sigcse2017	SIGSCE	2017	683-684	2	Special Sessions	ACM Joint Task Force on Cybersecurity Education.	Diana Burley; Matt Bishop; Siddharth Kaza; David S. Gibson; Elizabeth K. Hawthorne; Scott Buck	https://doi.org/10.1145/3017680.3017811	FALSE
conf/sigcse/sigcse2017	SIGSCE	2017	722	1	Birds of a Feather: Bates -- Garcia	Advancing Data Science for Students of All Majors (Abstract Only).	Lillian N. Cassel; Michael Posner; Darina Dicheva; Don Goelman; Heikki Topi; Christo Dichev	https://doi.org/10.1145/3017680.3022362	FALSE
conf/sigcse/sigcse2017	SIGSCE	2017	712	1	Posters: Hovemeyer -- Miller	Agile Development in Project-based Curriculum at Scale for Middle and High School Girls (Abstract Only).	Sarah Judd; Megan Sullivan; Jeff Stern	https://doi.org/10.1145/3017680.3022416	FALSE
conf/sigcse/sigcse2017	SIGSCE	2017	723	1	Birds of a Feather: Bates -- Garcia	Alternative Publishing and Dissemination of CS Education Research (Abstract Only).	Nickolas J. G. Falkner; Elizabeth Patitsas; Colleen M. Lewis	https://doi.org/10.1145/3017680.3022369	FALSE
conf/sigcse/sigcse2017	SIGSCE	2017	710	1	Posters: Hovemeyer -- Miller	An interactive Web Application Visualizing Memory Space for Novice C Programmers (Abstract Only).	Ryosuke Ishizue; Kazunori Sakamoto; Hironori Washizaki; Yoshiaki Fukazawa	https://doi.org/10.1145/3017680.3022433	FALSE
conf/sigcse/sigcse2017	SIGSCE	2017	742	1	Workshops: Matthews -- Winter	An Introduction to the Weka Data Mining System (Abstract Only).	Ingrid Russell; Zdravko Markov	https://doi.org/10.1145/3017680.3017821	FALSE
conf/sigcse/sigcse2017	SIGSCE	2017	730	1	Birds of a Feather: Price -- Yongpradit	An IoT BOF (Abstract Only).	Michael P. Rogers; Bill Siever	https://doi.org/10.1145/3017680.3022352	FALSE
conf/sigcse/sigcse2017	SIGSCE	2017	742	1	Workshops: Matthews -- Winter	An IoTa of IoT (Abstract Only).	Bill Siever; Michael P. Rogers	https://doi.org/10.1145/3017680.3017820	FALSE
conf/sigcse/sigcse2017	SIGSCE	2017	705	1	Posters: Alphonce -- Haynie	Analysis of Associations between Motivation and Previous Computer Science Experience, Gender, Ethnicity and Privilege as Observed in a Large Scale Survey of Middle School Students (Abstract Only).	Jeffrey Bush; Susan Miller	https://doi.org/10.1145/3017680.3022441	FALSE
conf/sigcse/sigcse2017	SIGSCE	2017	641-642	2	Demo Sessions	App Lab: A Powerful JavaScript IDE for Rapid Prototyping of Small Data-backed Web Applications (Abstract Only).	Alice Steinglass; Baker Franke; Sarah Filman	https://doi.org/10.1145/3017680.3022382	FALSE
conf/sigcse/sigcse2017	SIGSCE	2017	716	1	Posters: Patek -- Zarch	Applications of Specifications Grading in Computer Science Courses (Abstract Only).	Christian Roberson	https://doi.org/10.1145/3017680.3022403	FALSE
conf/sigcse/sigcse2017	SIGSCE	2017	765-766	2	ACM Student Research Competition -- Undergraduate	Applying Machine Learning to Predict Davidson College's Admissions Yield.	Joseph Jamison	https://doi.org/10.1145/3017680.3022468	FALSE
conf/sigcse/sigcse2017	SIGSCE	2017	651-652	2	Panels	Beyond Autograding: Advances in Student Feedback Platforms.	John DeNero; Sumukh Sridhara; Manuel A. Pérez-Quiñones; Aatish Nayak; Ben Leong	https://doi.org/10.1145/3017680.3017686	FALSE
conf/sigcse/sigcse2017	SIGSCE	2017	639-640	2	Demo Sessions	BlockPy Interactive Demo: Dual Text/Block Python Programming Environment for Guided Practice and Data Science (Abstract Only).	Austin Cory Bart; Dennis G. Kafura	https://doi.org/10.1145/3017680.3022383	FALSE
conf/sigcse/sigcse2017	SIGSCE	2017	699	1	Lightning Talks	Bringing Real-Time Collaboration to Visual Programming (Abstract Only).	Brian Broll; Ákos Lédeczi	https://doi.org/10.1145/3017680.3022387	FALSE
conf/sigcse/sigcse2017	SIGSCE	2017	671-672	2	Panels	Bringing Undergraduate Research Experience in Non-R1 Institutions.	Farzana Rahman; Helen H. Hu; Dennis Brylow; Clif Kussmaul	https://doi.org/10.1145/3017680.3017689	FALSE
conf/sigcse/sigcse2017	SIGSCE	2017	697-698	2	Special Sessions	Broadening Participation in Computer Science: Key Strategies from International Findings.	Rebecca Vivian; Katrina Falkner; Claudia Szabo	https://doi.org/10.1145/3017680.3017810	FALSE
conf/sigcse/sigcse2017	SIGSCE	2017	708	1	Posters: Alphonce -- Haynie	Broadening Participation Research Project: Exploring Computing Careers through a Virtual Career Exploration Fair Using Embodied Conversational Agents (Abstract Only).	Kinnis Gosha; Kamal Middlebrook	https://doi.org/10.1145/3017680.3022425	FALSE
conf/sigcse/sigcse2017	SIGSCE	2017	715	1	Posters: Patek -- Zarch	Broadening Secure Mobile Software Development (SMSD) Through Curriculum Development (Abstract Only).	Kai Qian; Hossain Shahriar; Fan Wu; Cassandra Thomas; Emmanuel Agu	https://doi.org/10.1145/3017680.3022438	FALSE
conf/sigcse/sigcse2017	SIGSCE	2017	732	1	Birds of a Feather: Price -- Yongpradit	Building and Supporting a Community of CS Educators Teaching Cybersecurity in 2017 (Abstract Only).	Richard S. Weiss; Ambareen Siraj; Jens Mache; Elizabeth K. Hawthorne; Blair Taylor; Siddharth Kaza; Michael E. Locasto	https://doi.org/10.1145/3017680.3022370	FALSE
conf/sigcse/sigcse2017	SIGSCE	2017	713	1	Posters: Hovemeyer -- Miller	Building Bridges: How the Southeast is Increasing the Representation of Students with Disabilities in STEM (Abstract Only).	Daniela Marghitu; Amber Wagner	https://doi.org/10.1145/3017680.3022428	FALSE
conf/sigcse/sigcse2017	SIGSCE	2017	667-668	2	Panels	Building CS Teaching Capacity: Comparing Strategies for Achieving Large Scale Impact.	Kimberly Hughes; Carol L. Fletcher; Leigh Ann DeLyser; Anthoy Owen	https://doi.org/10.1145/3017680.3017685	FALSE
conf/sigcse/sigcse2017	SIGSCE	2017	718	1	Posters: Patek -- Zarch	Building Evaluative Capacity for Out of School Organizations that Engage Girls in Computer Science (Abstract Only).	Juliet Tiffany-Morales; Kathy Haynie; Jason Ravitz; Karen Peterson	https://doi.org/10.1145/3017680.3022417	FALSE
conf/sigcse/sigcse2017	SIGSCE	2017	703	1	Posters: Alphonce -- Haynie	Building Tools, Gathering Data: Precursors for Assessing Students' Programming Process (Abstract Only).	Carl Alphonce; Jacob Condello; Bina Ramamurthy; Simran Singh	https://doi.org/10.1145/3017680.3022415	FALSE
conf/sigcse/sigcse2017	SIGSCE	2017	735	1	Workshops: Amato -- Gunawardena	C-STEM: Engaging Students in Computing with Robotics (Abstract Only).	Tasha Frankie; Duane Wesley; James Gappy; Harry Cheng	https://doi.org/10.1145/3017680.3017832	FALSE
conf/sigcse/sigcse2017	SIGSCE	2017	715	1	Posters: Patek -- Zarch	Can Undergraduate Computing Research Be Student-Driven? (Abstract Only).	Chelsea Patek; Ankur Chattopadhyay	https://doi.org/10.1145/3017680.3022445	FALSE
conf/sigcse/sigcse2017	SIGSCE	2017	704	1	Posters: Alphonce -- Haynie	Can We Conduct A Social Construction Based Epistemology for CS1 and CS2 Students? (Abstract Only).	Frisque Brennen; Ankur Chattopadhyay	https://doi.org/10.1145/3017680.3022444	FALSE
conf/sigcse/sigcse2017	SIGSCE	2017	729	1	Birds of a Feather: Price -- Yongpradit	Can we really do it?: Conducting Significant Computer Science Research in Primarily Undergraduate Institutions (PUIs) (Abstract Only).	Farzana Rahman; Suzanne Matthews; Kelly A. Shaw; Andrea Danyluk	https://doi.org/10.1145/3017680.3022347	FALSE
conf/sigcse/sigcse2017	SIGSCE	2017	647-648	2	Panels	CC2020: A Vision on Computing Curricula.	Alison Clear; Allen Parrish; Ming Zhang; Gerrit C. van der Veer	https://doi.org/10.1145/3017680.3017690	FALSE
conf/sigcse/sigcse2017	SIGSCE	2017	701-702	2	Lightning Talks	Class-Sourcing Exams: Student-Generated Exam Questions (Abstract Only).	Kendra Walther	https://doi.org/10.1145/3017680.3022389	FALSE
conf/sigcse/sigcse2017	SIGSCE	2017	715	1	Posters: Patek -- Zarch	CodeBox64: A Tactile Input Modality for Block Programming (Abstract Only).	Max Paulk; Amber Wagner	https://doi.org/10.1145/3017680.3022429	FALSE
conf/sigcse/sigcse2017	SIGSCE	2017	716	1	Posters: Patek -- Zarch	Coding for All: Computer Science Outreach for All Ages and Budgets (Abstract Only).	Jennifer Sabourin; Lucy Kosturko; Scott W. McQuiggan	https://doi.org/10.1145/3017680.3022410	FALSE
conf/sigcse/sigcse2017	SIGSCE	2017	728	1	Birds of a Feather: Hawthorne -- Pollock	Collaborative research into Game Jams, Hackathons and Event-Based Teaching in Higher Education (Abstract Only).	Ian Pollock; Lonny Brooks	https://doi.org/10.1145/3017680.3022367	FALSE
conf/sigcse/sigcse2017	SIGSCE	2017	720	1	Posters: Patek -- Zarch	Collecting Participation Data Across NSF CS10K-Funded Professional Development Providers (Abstract Only).	Rebecca Zarch; Alan Peterfreund	https://doi.org/10.1145/3017680.3022405	FALSE
conf/sigcse/sigcse2017	SIGSCE	2017	722	1	Birds of a Feather: Bates -- Garcia	Communicating What Liberal Arts Colleges Contribute to Computer Science (Abstract Only).	Janet Davis; Angela Berardinelli; Amanda M. Holland-Minkley; Ellen Walker	https://doi.org/10.1145/3017680.3022357	FALSE
conf/sigcse/sigcse2017	SIGSCE	2017	669-670	2	Panels	Community Engagement with Free and Open Source Software.	Christian Murphy; Kevin Buffardi; Josh Dehlinger; Lynn Lambert; Nanette Veilleux	https://doi.org/10.1145/3017680.3017682	FALSE
conf/sigcse/sigcse2017	SIGSCE	2017	399-403	5	Papers: Maxwell -- Pierce	Comparing Outcomes Across Different Contexts in CS1.	Bruce A. Maxwell; Stephanie R. Taylor	https://doi.org/10.1145/3017680.3017757	FALSE
conf/sigcse/sigcse2017	SIGSCE	2017	726	1	Birds of a Feather: Hawthorne -- Pollock	Competency-Based Education in Lower-Division Computer Science Taught at Community Colleges (Abstract Only).	Amardeep Kahlon; Linda Smarzik; Mary Kohls	https://doi.org/10.1145/3017680.3022364	FALSE
conf/sigcse/sigcse2017	SIGSCE	2017	711	1	Posters: Hovemeyer -- Miller	Computational Thinking App Design Mat: Supporting the Development of Students' Computational Thinking Skills (Abstract Only).	Yerika Jimenez; Theodore Hays; Christina Gardner-McCune	https://doi.org/10.1145/3017680.3022412	FALSE
conf/sigcse/sigcse2017	SIGSCE	2017	725	1	Birds of a Feather: Hawthorne -- Pollock	Computer Science Curricular Guidelines for Associate-Degree Transfer Programs (Abstract Only).	Elizabeth K. Hawthorne; Cara Tang; Cindy Tucker; Christian Servin	https://doi.org/10.1145/3017680.3022348	FALSE
conf/sigcse/sigcse2017	SIGSCE	2017	709	1	Posters: Hovemeyer -- Miller	Computer Science Teaching Knowledge: A Framework and Assessment (Abstract Only).	Aleata Hubbard; Yvonne Kao	https://doi.org/10.1145/3017680.3022399	FALSE
conf/sigcse/sigcse2017	SIGSCE	2017	643-644	2	Panels	Computer Science Topics in First- and Second- Year Seminar Courses.	Valerie Barr; Bryan Catron; Christopher A. Healy; Kate Lockwood; Anil M. Shende; Andrea Tartaro; Kevin Treu	https://doi.org/10.1145/3017680.3017688	FALSE
conf/sigcse/sigcse2017	SIGSCE	2017	675-676	2	Special Sessions	Computing Education in Liberal Arts Colleges: A Status Report of the SIGCSE Committee.	Doug Baldwin; Grant Braught; Amanda M. Holland-Minkley	https://doi.org/10.1145/3017680.3017806	FALSE
conf/sigcse/sigcse2017	SIGSCE	2017	693-694	2	Special Sessions	Computing in the Arts: Curricular Innovations and Results.	Renée McCauley; Bill Z. Manaris; David Heise; Cate Sheller; Jennifer Jolley; Alan Zaring	https://doi.org/10.1145/3017680.3017807	FALSE
conf/sigcse/sigcse2017	SIGSCE	2017	567-571	5	Papers: Sohoni -- Weintrop	CORP: Co-operative Remote Practicum Work Experience Model for Software Engineering Education.	Dannie M. Stanley	https://doi.org/10.1145/3017680.3017710	FALSE
conf/sigcse/sigcse2017	SIGSCE	2017	716	1	Posters: Patek -- Zarch	Cracking the Code: Bringing Introductory Computer Science to a Charleston Middle School (Abstract Only).	Clare A. Rumsey; Quinn Burke; Chris Thurman	https://doi.org/10.1145/3017680.3022424	FALSE
conf/sigcse/sigcse2017	SIGSCE	2017	739	1	Workshops: Heckman -- Martin	Creating Peer Grading Videos (Abstract Only).	Shawn Lupoli; Karan K. Budhraja	https://doi.org/10.1145/3017680.3017816	FALSE
conf/sigcse/sigcse2017	SIGSCE	2017	773-774	2	ACM Student Research Competition -- Undergraduate	Creative Computing and Society: When Undergraduates Design a Curriculum for an Introductory Computing Course.	Sierra Magnotta; Anushikha Sharma; Jingya Wu; Darakhshan J. Mir	https://doi.org/10.1145/3017680.3022459	FALSE
conf/sigcse/sigcse2017	SIGSCE	2017	677-678	2	Special Sessions	CS 1: Beyond Programming.	Douglas Baldwin; Valerie Barr; Amy Briggs; Jessen T. Havill; Bruce Maxwell; Henry M. Walker	https://doi.org/10.1145/3017680.3017802	FALSE
conf/sigcse/sigcse2017	SIGSCE	2017	734	1	Workshops: Amato -- Gunawardena	CS Discoveries: An Introductory Course for Late Middle and Early High School (Abstract Only).	Josh Caldwell; Dani McAvoy; G. T. Wrobel	https://doi.org/10.1145/3017680.3017834	FALSE
conf/sigcse/sigcse2017	SIGSCE	2017	705	1	Posters: Alphonce -- Haynie	CS for SC: A Landscape Report of K-12 Computer Science in South Carolina (Abstract Only).	Quinn Burke; Madeleine Schep; Travis Dalton	https://doi.org/10.1145/3017680.3022413	FALSE
conf/sigcse/sigcse2017	SIGSCE	2017	712	1	Posters: Hovemeyer -- Miller	CS1: Computation & Cognition - An Evidence-Based Course to Broaden Participation (Abstract Only).	Clif Kussmaul	https://doi.org/10.1145/3017680.3022402	FALSE
conf/sigcse/sigcse2017	SIGSCE	2017	730	1	Birds of a Feather: Price -- Yongpradit	CS4What?: A Game-based Discussion about the Purposes of Universal Computer Science Education (Abstract Only).	Rafi Santo; David Phelps	https://doi.org/10.1145/3017680.3022371	FALSE
conf/sigcse/sigcse2017	SIGSCE	2017	645-646	2	Panels	CSPd Week: A Scalable Model for Preparing Teachers for CS for All.	Tracy Camp; Emmanuel Schanzer; Joanna Goode; Owen L. Astrachan; Ed Campos	https://doi.org/10.1145/3017680.3017681	FALSE
conf/sigcse/sigcse2017	SIGSCE	2017	730	1	Birds of a Feather: Price -- Yongpradit	CSTA K-12 CS Standards for All (Abstract Only).	Deborah W. Seehorn; Lissa Clayborn	https://doi.org/10.1145/3017680.3022341	FALSE
conf/sigcse/sigcse2017	SIGSCE	2017	717	1	Posters: Patek -- Zarch	Curricular Guidance for Associate-Degree Transfer Programs in Computer Science with Contemporary Cybersecurity Concepts (Abstract Only).	Cara Tang; Cindy Tucker; Elizabeth K. Hawthorne; Christian Servin; Teresa Moore	https://doi.org/10.1145/3017680.3022398	FALSE
conf/sigcse/sigcse2017	SIGSCE	2017	701	1	Lightning Talks	Curriculum Design for 'Explorations in Computing' (a New General Education Course at USC) (Abstract Only).	Saty Raghavachary	https://doi.org/10.1145/3017680.3022395	FALSE
conf/sigcse/sigcse2017	SIGSCE	2017	717	1	Posters: Patek -- Zarch	Cyber Crime Investigators: Pathways from High School to Cybersecurity Careers for First Generation College-Bound Students (Abstract Only).	Nicole Simon; Megan Banford	https://doi.org/10.1145/3017680.3022400	FALSE
conf/sigcse/sigcse2017	SIGSCE	2017	733	1	Workshops: Amato -- Gunawardena	Designing Blended Learning Models to Support Computational Learning: Minecraft Edition (Abstract Only).	Dominic A. Amato; Ugochi Acholonu	https://doi.org/10.1145/3017680.3017841	FALSE
conf/sigcse/sigcse2017	SIGSCE	2017	737	1	Workshops: Heckman -- Martin	Designing Empirical Education Research Studies (DEERS): Creating an Answerable Research Question (Abstract Only).	Sarah Heckman; Jeffrey C. Carver; Mark Sherriff	https://doi.org/10.1145/3017680.3017836	FALSE
conf/sigcse/sigcse2017	SIGSCE	2017	700-701	2	Lightning Talks	Developing Big Data Curriculum with Open Source Infrastructure (Abstract Only).	Anurag Nagar	https://doi.org/10.1145/3017680.3022386	FALSE
conf/sigcse/sigcse2017	SIGSCE	2017	775-776	2	ACM Student Research Competition -- Undergraduate	Digitalizing Paper-Based Exams: An Assessment of Programming Grading Assistant.	Hannah E. Murphy	https://doi.org/10.1145/3017680.3022448	FALSE
conf/sigcse/sigcse2017	SIGSCE	2017	640	1	Demo Sessions	Distributed Programming with NetsBlox is a Snap! (Abstract Only).	Brian Broll; Ákos Lédeczi	https://doi.org/10.1145/3017680.3022379	FALSE
conf/sigcse/sigcse2017	SIGSCE	2017	717	1	Posters: Patek -- Zarch	Do Computer Science Exposure Activities and Courses Influence the Pursuit of Computing Majors in Higher Education among Underrepresented High School Students? (Abstract Only).	Allison Scott; Alexis Martin; Frieda McAlear	https://doi.org/10.1145/3017680.3022422	FALSE
conf/sigcse/sigcse2017	SIGSCE	2017	707	1	Posters: Alphonce -- Haynie	Early Intervention to Enhance Female Interest in Computing Sciences (Abstract Only).	Jean French; Hailey Crouse	https://doi.org/10.1145/3017680.3022408	FALSE
conf/sigcse/sigcse2017	SIGSCE	2017	640	1	Demo Sessions	EarSketch, a Web-application to Teach Computer Science through Music (Abstract Only).	Jason Freeman; Brian Magerko; Doug Edwards; Lea Ikkache	https://doi.org/10.1145/3017680.3022376	FALSE
conf/sigcse/sigcse2017	SIGSCE	2017	642	1	Demo Sessions	Elegit: Git Learning Tool for Students (Abstract Only).	Eric Walker; Julia Connelly; David R. Musicant	https://doi.org/10.1145/3017680.3022380	FALSE
conf/sigcse/sigcse2017	SIGSCE	2017	7	1	Keynote Addresses	Embracing Uncertainty.	Jeannette M. Wing	https://doi.org/10.1145/3017680.3025045	FALSE
conf/sigcse/sigcse2017	SIGSCE	2017	710	1	Posters: Hovemeyer -- Miller	Emerging Learning Progressions in K-5 Integrated Mathematics And Computer Science Lesson Plans (Abstract Only).	Maya Israel; Todd Lash; George Reese	https://doi.org/10.1145/3017680.3022421	FALSE
conf/sigcse/sigcse2017	SIGSCE	2017	735	1	Workshops: Amato -- Gunawardena	Engaging Students with Algorithms (Abstract Only).	Crystal Furman; Sandy Czajka; Adrienne Decker; Dianna Xu	https://doi.org/10.1145/3017680.3017829	FALSE
conf/sigcse/sigcse2017	SIGSCE	2017	719	1	Posters: Patek -- Zarch	Enhancing Cybersecurity Education Using POGIL (Abstract Only).	Xiaohong Yuan; Li Yang; Wu He; Jennifer T. Ellis; Jinsheng Xu; Cynthia K. Waters	https://doi.org/10.1145/3017680.3022423	FALSE
conf/sigcse/sigcse2017	SIGSCE	2017	699	1	Lightning Talks	Establishing Conventions for Citing Educational Materials (Abstract Only).	Douglas H. Fisher	https://doi.org/10.1145/3017680.3022396	FALSE
conf/sigcse/sigcse2017	SIGSCE	2017	722	1	Birds of a Feather: Bates -- Garcia	Evaluating the Long-Term Impact of Pre-college Computing Activities (Abstract Only).	Adrienne Decker; Monica McGill; Alan Peterfreund	https://doi.org/10.1145/3017680.3022344	FALSE
conf/sigcse/sigcse2017	SIGSCE	2017	741	1	Workshops: Matthews -- Winter	Evidence Based Teaching Practices in CS (Abstract Only).	Briana B. Morrison; Mark Guzdial; Cynthia Bailey Lee; Leo Porter; Beth Simon	https://doi.org/10.1145/3017680.3017833	FALSE
conf/sigcse/sigcse2017	SIGSCE	2017	713	1	Posters: Hovemeyer -- Miller	Examining PhD Student Interest in Teaching: An Analysis of 19 Years of Historical Data (Abstract Only).	Travis Mandel; Jens Mache	https://doi.org/10.1145/3017680.3022427	FALSE
conf/sigcse/sigcse2017	SIGSCE	2017	719	1	Posters: Patek -- Zarch	Finding Exercise Equilibrium: How to Support the Game Balance at the Very Beginning? (Abstract Only).	Jan Vykopal; Jakub Cegan	https://doi.org/10.1145/3017680.3022409	FALSE
conf/sigcse/sigcse2017	SIGSCE	2017	731	1	Birds of a Feather: Price -- Yongpradit	Forming Strong and Effective Student Teams (Abstract Only).	Anya Tafliovich; Jennifer Campbell; Daniel Zingaro; Francisco J. Estrada; Leo Porter	https://doi.org/10.1145/3017680.3022372	FALSE
conf/sigcse/sigcse2017	SIGSCE	2017	737	1	Workshops: Heckman -- Martin	From Lightbulbs to Logic: Teaching Hardware in Intro to CS (Abstract Only).	Sean Hickey	https://doi.org/10.1145/3017680.3017840	FALSE
conf/sigcse/sigcse2017	SIGSCE	2017	5	1	Keynote Addresses	Fulfilling Papert's Dream: Computational Fluency for All.	Mitchel Resnick	https://doi.org/10.1145/3017680.3025046	FALSE
conf/sigcse/sigcse2017	SIGSCE	2017	726	1	Birds of a Feather: Hawthorne -- Pollock	GitHub, Tutors, Relatives, and Friends: The Wide Web of Plagiarism (Abstract Only).	Amardeep Kahlon; Bonnie K. MacKellar; Anastasia Kurdia	https://doi.org/10.1145/3017680.3022363	FALSE
conf/sigcse/sigcse2017	SIGSCE	2017	739	1	Workshops: Heckman -- Martin	GP: A General Purpose Blocks-Based Language (Abstract Only).	John Maloney; Michael Nagle; Jens Mönig	https://doi.org/10.1145/3017680.3017825	FALSE
conf/sigcse/sigcse2017	SIGSCE	2017	725	1	Birds of a Feather: Hawthorne -- Pollock	Handling Very Large Lecture Courses: Keeping the Wheels on the Bus III (Abstract Only).	Josh Hug; Cynthia Lee	https://doi.org/10.1145/3017680.3022374	FALSE
conf/sigcse/sigcse2017	SIGSCE	2017	743	1	Workshops: Matthews -- Winter	Hands-on Cybersecurity Exercises That are Easy to Access and Assess (Abstract Only).	Richard S. Weiss; Jens Mache; Michael E. Locasto; Franklyn A. Turbak	https://doi.org/10.1145/3017680.3017842	FALSE
conf/sigcse/sigcse2017	SIGSCE	2017	723	1	Birds of a Feather: Bates -- Garcia	High School CS Teacher Certification: Standards, Assessments, and Professional Development (Abstract Only).	Carol L. Fletcher; William Wesley Monroe	https://doi.org/10.1145/3017680.3022355	FALSE
conf/sigcse/sigcse2017	SIGSCE	2017	681-682	2	Special Sessions	Holistic Development of Underrepresented Students through Academic: Industry Partnerships.	Legand Burge; Marlon Mejias; KaMar Galloway; Kinnis Gosha; Jean Muhammad	https://doi.org/10.1145/3017680.3017808	FALSE
conf/sigcse/sigcse2017	SIGSCE	2017	711	1	Posters: Hovemeyer -- Miller	Hopper's Fables: A Mathematical Storytelling Adventure (Abstract Only).	Deja Jackson; Cindi Simmons; Kate Zelaya; Erica Pantoja; Amber Wagner	https://doi.org/10.1145/3017680.3022430	FALSE
conf/sigcse/sigcse2017	SIGSCE	2017	735	1	Workshops: Amato -- Gunawardena	How to Collect, Analyze and Act on Learning Data in Computer Science Courses (Abstract Only).	Ananda Gunawardena	https://doi.org/10.1145/3017680.3017819	FALSE
conf/sigcse/sigcse2017	SIGSCE	2017	737	1	Workshops: Heckman -- Martin	How to Integrate Interactive Learning into Large Classes (Abstract Only).	Stephan Krusche; Andreas Seitz; Nadine von Frankenberg; Bernd Bruegge	https://doi.org/10.1145/3017680.3017843	FALSE
conf/sigcse/sigcse2017	SIGSCE	2017	742	1	Workshops: Matthews -- Winter	How to Plan and Run Computing Summer Camps: Logistics (Abstract Only).	Krishnendu Roy; Kristine S. Nagel; Sarah T. Dunton	https://doi.org/10.1145/3017680.3017823	FALSE
conf/sigcse/sigcse2017	SIGSCE	2017	735	1	Workshops: Amato -- Gunawardena	How to Plan and Run Effective Teacher Professional Development (Abstract Only).	Barbara Ericson; Rebecca Dovi; Ria Galanos	https://doi.org/10.1145/3017680.3017824	FALSE
conf/sigcse/sigcse2017	SIGSCE	2017	761-762	2	ACM Student Research Competition -- Undergraduate	Identifying and Exploiting Vulnerabilities in Civilian Unmanned Aerial Vehicle Systems and Evaluating and Countering Potential Threats Against the United States Airspace.	Philip J. Costello	https://doi.org/10.1145/3017680.3022449	FALSE
conf/sigcse/sigcse2017	SIGSCE	2017	703	1	Posters: Alphonce -- Haynie	Implementing "In-Lab" Autograding for Snap! (Abstract Only).	Michael Ball	https://doi.org/10.1145/3017680.3022443	FALSE
conf/sigcse/sigcse2017	SIGSCE	2017	713	1	Posters: Hovemeyer -- Miller	Implementing CS Principles as a Breadth-First Survey Course (Abstract Only).	Chris Mayfield	https://doi.org/10.1145/3017680.3022411	FALSE
conf/sigcse/sigcse2017	SIGSCE	2017	728	1	Birds of a Feather: Hawthorne -- Pollock	Improving Effectiveness of CS Teacher Professional Development (Abstract Only).	Karen Parker; Sloan Davis; Chris Stephenson; Jason Ravitz	https://doi.org/10.1145/3017680.3022356	FALSE
conf/sigcse/sigcse2017	SIGSCE	2017	787-788	2	ACM Student Research Competition -- Undergraduate	Improving SAT-solving with Machine Learning.	Haoze Wu	https://doi.org/10.1145/3017680.3022464	FALSE
conf/sigcse/sigcse2017	SIGSCE	2017	655-656	2	Panels	Increasing Diversity in the Face of Enrollment Increases.	Wendy M. DuBow; Ignatios Vakalis; Laura K. Dillon; Helen H. Hu	https://doi.org/10.1145/3017680.3017683	FALSE
conf/sigcse/sigcse2017	SIGSCE	2017	743	1	Workshops: Matthews -- Winter	Increasing Student Interest in Data Structures Courses with Real-World Data and Visualizations Using BRIDGES (Abstract Only).	Kalpathi R. Subramanian; Jamie Payton	https://doi.org/10.1145/3017680.3017828	FALSE
conf/sigcse/sigcse2017	SIGSCE	2017	1	1	Keynote Addresses	Inspire, Innovate, Improve!: What does this mean for CS for All?	Gail Chapman	https://doi.org/10.1145/3017680.3025047	FALSE
conf/sigcse/sigcse2017	SIGSCE	2017	640-641	2	Demo Sessions	Interactive Problem Solving Using Mobile Devices in the Classroom (Abstract Only).	M. Muztaba Fuad	https://doi.org/10.1145/3017680.3022378	FALSE
conf/sigcse/sigcse2017	SIGSCE	2017	705	1	Posters: Alphonce -- Haynie	Investigating the Impact of Unsolicited Next-Step and Subgoal Hints on Dropout in a Logic Proof Tutor (Abstract Only).	Christa Cody; Behrooz Mostafavi	https://doi.org/10.1145/3017680.3022426	FALSE
conf/sigcse/sigcse2017	SIGSCE	2017	709	1	Posters: Hovemeyer -- Miller	Learning and Identity in YWIC: An Analysis of Program Implementation and Design as Promoting Agency in Computing (Abstract Only).	Sarah Hug; Enrico Pontelli; Raena Cota; Suzanne Eyerman	https://doi.org/10.1145/3017680.3022435	FALSE
conf/sigcse/sigcse2017	SIGSCE	2017	702	1	Lightning Talks	Lessons learned from an EPIC course: Mobile Application Development for Mobile Health (Abstract Only).	Chen-Hsiang Yu	https://doi.org/10.1145/3017680.3022394	FALSE
conf/sigcse/sigcse2017	SIGSCE	2017	273-277	5	Papers: Graves -- Khuri	Making Robot Challenges with Virtual Robots.	Kevin J. Gucwa; Harry H. Cheng	https://doi.org/10.1145/3017680.3017700	FALSE
conf/sigcse/sigcse2017	SIGSCE	2017	777-778	2	ACM Student Research Competition -- Graduate	Managing the Internet of Things.	Benjamin Romano	https://doi.org/10.1145/3017680.3022452	FALSE
conf/sigcse/sigcse2017	SIGSCE	2017	731	1	Birds of a Feather: Price -- Yongpradit	Mapping Alice Curriculum to Standards: A BOF for the Alice Community (Abstract Only).	Donald J. Slater; Eric Brown; Wanda Dann	https://doi.org/10.1145/3017680.3022353	FALSE
conf/sigcse/sigcse2017	SIGSCE	2017	706	1	Posters: Alphonce -- Haynie	Measuring Learning of Code Patterns in InformalLearning Environments (Abstract Only).	Sayamindu Dasgupta; Benjamin Mako Hill	https://doi.org/10.1145/3017680.3022437	FALSE
conf/sigcse/sigcse2017	SIGSCE	2017	703	1	Posters: Alphonce -- Haynie	Merging MyCS: Lessons from a District-wide Middle-school CS pilot (Abstract Only).	Sam Andow; Kaitlyn Eng; Julia McCarthy; Olivia Palenscar; Thomas Schneider; Adam Schulze; Zachary Dodds; Bryan Twarek	https://doi.org/10.1145/3017680.3022414	FALSE
conf/sigcse/sigcse2017	SIGSCE	2017	733	1	Workshops: Amato -- Gunawardena	Micro Projects: Putting Light and Magic into Learning Computer Systems Concepts (Abstract Only).	Edwin Franklin Barry	https://doi.org/10.1145/3017680.3017835	FALSE
conf/sigcse/sigcse2017	SIGSCE	2017	351-355	5	Papers: Kim -- Lovellette	MIPSUnit: A Unit Testing Framework for MIPS Assembly.	Zachary Kurmas	https://doi.org/10.1145/3017680.3017747	FALSE
conf/sigcse/sigcse2017	SIGSCE	2017	753-754	2	ACM Student Research Competition -- Undergraduate	Mixed-initiative Personal Assistants.	Joshua W. Buck; Saverio Perugini	https://doi.org/10.1145/3017680.3022455	FALSE
conf/sigcse/sigcse2017	SIGSCE	2017	738	1	Workshops: Heckman -- Martin	Modules for Integrating Cryptography in Introductory CS and Computer Security Courses (Abstract Only).	Yesem Kurt-Peker	https://doi.org/10.1145/3017680.3017831	FALSE
conf/sigcse/sigcse2017	SIGSCE	2017	718	1	Posters: Patek -- Zarch	Motivating K-12 Students Toward Computer Science, and Computer Science Students Toward Teaching (Abstract Only).	Peter A. Tucker; Robert Bryant	https://doi.org/10.1145/3017680.3022431	FALSE
conf/sigcse/sigcse2017	SIGSCE	2017	700	1	Lightning Talks	Moving From Business Education to Computer Science Concepts in the Middle Grades (Abstract Only).	Patty Hicks	https://doi.org/10.1145/3017680.3022391	FALSE
conf/sigcse/sigcse2017	SIGSCE	2017	745-746	2	ACM Student Research Competition -- Graduate	Neo-Piagetian Classification of Reasoning Ability and Mental Simulation in Microsoft's Kodu Game Lab.	Ashish Aggarwal	https://doi.org/10.1145/3017680.3022469	FALSE
conf/sigcse/sigcse2017	SIGSCE	2017	695-696	2	Special Sessions	Nifty Assignments.	Nick Parlante; Julie Zelenski; Dave Feinberg; Kunal Mishra; Josh Hug; Kevin Wayne; Michael Guerzhoy; Jackie Chi Kit Cheung; François Pitt	https://doi.org/10.1145/3017680.3028255	FALSE
conf/sigcse/sigcse2017	SIGSCE	2017	706	1	Posters: Alphonce -- Haynie	On the Integration of Big Data and Cloud Computing Topics (Abstract Only).	Debzani Deb	https://doi.org/10.1145/3017680.3022436	FALSE
conf/sigcse/sigcse2017	SIGSCE	2017	769-770	2	ACM Student Research Competition -- Undergraduate	One Size Doesn't Fit All.	Zane Ryan Johnston	https://doi.org/10.1145/3017680.3022470	FALSE
conf/sigcse/sigcse2017	SIGSCE	2017	710	1	Posters: Hovemeyer -- Miller	Open Extensible System for Dynamic Problem Creation for Computer Science (Abstract Only).	Keith Irwin; Darina Dicheva; Christo Dichev	https://doi.org/10.1145/3017680.3022419	FALSE
conf/sigcse/sigcse2017	SIGSCE	2017	767-768	2	ACM Student Research Competition -- Undergraduate	Optimizing Kinect® Depth Sensing Using Dynamic Polarization.	Jakub Jancek; Darya Aleinikava; Grace M. Mirsky	https://doi.org/10.1145/3017680.3022460	FALSE
conf/sigcse/sigcse2017	SIGSCE	2017	757-758	2	ACM Student Research Competition -- Undergraduate	ORC	Jianting Chen; Medha Gopalaswamy; Prabir Pradhan; Sooji Son; Peter-Michael Osera	https://doi.org/10.1145/3017680.3022466	FALSE
conf/sigcse/sigcse2017	SIGSCE	2017	665-666	2	Panels	Panel: Teaching To Increase Diversity and Equity in STEM.	Helen H. Hu; Douglas Blank; Albert Chan; Travis E. Doom	https://doi.org/10.1145/3017680.3017695	FALSE
conf/sigcse/sigcse2017	SIGSCE	2017	743	1	Workshops: Matthews -- Winter	Peer Instruction in Practice (Abstract Only).	Cynthia Taylor; Joe Hummel; David Hovemeyer; David P. Bunde; John F. Dooley; Jaime Spacco	https://doi.org/10.1145/3017680.3017837	FALSE
conf/sigcse/sigcse2017	SIGSCE	2017	727	1	Birds of a Feather: Hawthorne -- Pollock	Perspectives on Teaching Humanitarian Free and Open Source Software (Abstract Only).	Becka Morgan; Heidi J. C. Ellis; Gregory W. Hislop; Grant Braught; Lori Postner	https://doi.org/10.1145/3017680.3022359	FALSE
conf/sigcse/sigcse2017	SIGSCE	2017	723	1	Birds of a Feather: Bates -- Garcia	Practical Systems Programming in Computer Science Education (Abstract Only).	Peter H. Fröhlich; Borja Sotomayor	https://doi.org/10.1145/3017680.3022373	FALSE
conf/sigcse/sigcse2017	SIGCSE	2017	531-536	6	Papers: Pollock -- Smith	"Creating Cool Stuff": Pupils' Experience of the BBC micro: bit.	Sue Sentance; Jane Waite; Steve Hodges; Emily MacLeod; Lucy Yeomans	https://doi.org/10.1145/3017680.3017749	TRUE
conf/sigcse/sigcse2017	SIGSCE	2017	724	1	Birds of a Feather: Bates -- Garcia	Process Oriented Guided Inquiry Learning (POGIL) in the CS Classroom (Abstract Only).	Saturnino Garcia	https://doi.org/10.1145/3017680.3022368	FALSE
conf/sigcse/sigcse2017	SIGCSE	2017	591-596	6	Papers: Sohoni -- Weintrop	A Collaborative Approach to Teaching Software Architecture.	Arie van Deursen; Mauricio Finavaro Aniche; Joop Aué; Rogier Slag; Michael de Jong; Alex Nederlof; Eric Bouwers	https://doi.org/10.1145/3017680.3017737	TRUE
conf/sigcse/sigcse2017	SIGCSE	2017	621-626	6	Papers: Sohoni -- Weintrop	A Comparative Analysis of Online and Face-to-Face Professional Development Models for CS Education.	David C. Webb; Hilarie Nickerson; Jeffrey B. Bush	https://doi.org/10.1145/3017680.3017784	TRUE
conf/sigcse/sigcse2017	SIGSCE	2017	709	1	Posters: Hovemeyer -- Miller	Progsnap: Sharing Programming Snapshots for Research (Abstract Only).	David Hovemeyer; Arto Hellas; Andrew Petersen; Jaime Spacco	https://doi.org/10.1145/3017680.3022418	FALSE
conf/sigcse/sigcse2017	SIGSCE	2017	789-790	2	ACM Student Research Competition -- Undergraduate	Quadrilateral Mesh Boundary Classification and Editing.	Ziyan Yang	https://doi.org/10.1145/3017680.3022447	FALSE
conf/sigcse/sigcse2017	SIGSCE	2017	763-764	2	ACM Student Research Competition -- Undergraduate	Quadrilateral Mesh Generation with a Provably Good Aspect Ratio Bound.	Christopher Gillespie; Mark Moore; Colin Brown	https://doi.org/10.1145/3017680.3022461	FALSE
conf/sigcse/sigcse2017	SIGCSE	2017	495-500	6	Papers: Pollock -- Smith	A Literature Review through the Lens of Computer Science Learning Goals Theorized and Explored in Research.	Kathryn Rich; Carla Strickland; Diana Franklin	https://doi.org/10.1145/3017680.3017772	TRUE
conf/sigcse/sigcse2017	SIGSCE	2017	759-760	2	ACM Student Research Competition -- Undergraduate	Raising Flags: Detecting Covert Storage Channels Using Relative Entropy.	Josephine K. Chow; Xiangyang Li; Xenia Mountrouidou	https://doi.org/10.1145/3017680.3022454	FALSE
conf/sigcse/sigcse2017	SIGCSE	2017	255-260	6	Papers: Graves -- Khuri	A Modern Wearable Devices Course for Computer Science Undergraduates.	Chris Gregg; Raewyn Duvall; Kate Wasynczuk	https://doi.org/10.1145/3017680.3017731	TRUE
conf/sigcse/sigcse2017	SIGSCE	2017	771-772	2	ACM Student Research Competition -- Undergraduate	Recursive Convergence.	Amy MacDonough	https://doi.org/10.1145/3017680.3022457	FALSE
conf/sigcse/sigcse2017	SIGCSE	2017	321-326	6	Papers: Kim -- Lovellette	A Pedagogical Analysis of Online Coding Tutorials.	Ada S. Kim; Andrew J. Ko	https://doi.org/10.1145/3017680.3017728	TRUE
conf/sigcse/sigcse2017	SIGSCE	2017	732	1	Birds of a Feather: Price -- Yongpradit	Researching the K-12 Computer Science Framework (Abstract Only).	Pat Yongpradit	https://doi.org/10.1145/3017680.3022351	FALSE
conf/sigcse/sigcse2017	SIGCSE	2017	129-134	6	Papers: Brunvand -- DeWitt	A Study of the Use of a Reflective Activity to Improve Students' Software Design Capabilities.	John W. Coffey	https://doi.org/10.1145/3017680.3017770	TRUE
conf/sigcse/sigcse2017	SIGSCE	2017	657-658	2	Panels	Scaling Introductory Courses Using Undergraduate Teaching Assistants.	Jeffrey Forbes; David J. Malan; Heather Pon-Barry; Stuart Reges; Mehran Sahami	https://doi.org/10.1145/3017680.3017694	FALSE
conf/sigcse/sigcse2017	SIGSCE	2017	785-786	2	ACM Student Research Competition -- Graduate	Scaling Up Automated Verification: A Case Study and Formal-IDE for the Construction of High Integrity Software.	Daniel Welch	https://doi.org/10.1145/3017680.3022456	FALSE
conf/sigcse/sigcse2017	SIGCSE	2017	417-422	6	Papers: Maxwell -- Pierce	A Two-Course Sequence of Real Projects for Real Customers.	Christian Murphy; Swapneel Sheth; Sydney Morton	https://doi.org/10.1145/3017680.3017742	TRUE
conf/sigcse/sigcse2017	SIGSCE	2017	700	1	Lightning Talks	Seeking Evidence for Basing the CS Theory Course on Non-decision Problems (Abstract Only).	John MacCormick	https://doi.org/10.1145/3017680.3022388	FALSE
conf/sigcse/sigcse2017	SIGCSE	2017	81-86	6	Papers: Aggarwal -- Broll	A Visual Programming Environment for Learning Distributed Programming.	Brian Broll; Ákos Lédeczi; Péter Völgyesi; János Sallai; Miklos Maroti; Alexia Carrillo; Stephanie L. Weeden-Wright; Chris Vanags; Joshua D. Swartz; Melvin Lu	https://doi.org/10.1145/3017680.3017741	TRUE
conf/sigcse/sigcse2017	SIGSCE	2017	729	1	Birds of a Feather: Price -- Yongpradit	Sharing and Using Programming Log Data (Abstract Only).	Thomas W. Price; Neil C. C. Brown; Chris Piech; Kelly Rivers	https://doi.org/10.1145/3017680.3022366	FALSE
conf/sigcse/sigcse2017	SIGSCE	2017	712	1	Posters: Hovemeyer -- Miller	Should Your College Computer Science Program Partner with a Coding Boot Camp? (Abstract Only).	Louise Ann Lyon; Quinn Burke; Jill Denner; Jim Bowring	https://doi.org/10.1145/3017680.3022401	FALSE
conf/sigcse/sigcse2017	SIGSCE	2017	721	1	Birds of a Feather: Bates -- Garcia	SIGCSE Reads: Time for Book Discussion (Abstract Only).	Rebecca Bates; Valerie Summet; Nanette Veilleux	https://doi.org/10.1145/3017680.3022354	FALSE
conf/sigcse/sigcse2017	SIGSCE	2017	781-782	2	ACM Student Research Competition -- Graduate	Sniffing Through Millions of Blocks for Bad Smells.	Peeratham Techapalokul	https://doi.org/10.1145/3017680.3022450	FALSE
conf/sigcse/sigcse2017	SIGSCE	2017	653-654	2	Panels	Social Justice and Equity in CS Education: Inaugural Launch of AP Computer Science Principles.	Lien Diaz; Frances P. Trees; Dale Reed; Richard Kick; Andrew Kuemmel	https://doi.org/10.1145/3017680.3017693	FALSE
conf/sigcse/sigcse2017	SIGSCE	2017	687-688	2	Special Sessions	Special Session: Converting Your Teaching (or Even Your Whole Department!) to Active Learning via POGIL.	Helen H. Hu; Chris Mayfield; Janice L. Pearce	https://doi.org/10.1145/3017680.3017805	FALSE
conf/sigcse/sigcse2017	SIGSCE	2017	685-686	2	Special Sessions	Special Session: CS Education Research Knowledge Forum.	Kelsey Finkel; Kenneth E. Graves; Leigh Ann DeLyser	https://doi.org/10.1145/3017680.3017809	FALSE
conf/sigcse/sigcse2017	SIGSCE	2017	689-690	2	Special Sessions	Special Session: ICER UP CS Ed Research Workshop Summary-Essence of Illustrative Projects.	Eileen Kraemer; Aubrey Lawson; Murali Sitaraman	https://doi.org/10.1145/3017680.3017812	FALSE
conf/sigcse/sigcse2017	SIGCSE	2017	15-20	6	Papers: Aggarwal -- Broll	An Empirical Study of Debugging Patterns Among Novices Programmers.	Basma S. Alqadi; Jonathan I. Maletic	https://doi.org/10.1145/3017680.3017761	TRUE
conf/sigcse/sigcse2017	SIGSCE	2017	725	1	Birds of a Feather: Hawthorne -- Pollock	Strategies for Including Soft Skills and Interdisciplinary Content in CS Education (Abstract Only).	Amanda M. Holland-Minkley; Thomas E. Lombardi; Madeline E. Smith	https://doi.org/10.1145/3017680.3022360	FALSE
conf/sigcse/sigcse2017	SIGSCE	2017	729	1	Birds of a Feather: Price -- Yongpradit	Strengthening Informal CS Education Program Delivery through Evaluation Capacity Building (Abstract Only).	Jason Ravitz; Karen Peterson; Kathy Haynie; Juliet Tiffany-Morales	https://doi.org/10.1145/3017680.3022365	FALSE
conf/sigcse/sigcse2017	SIGCSE	2017	159-164	6	Papers: Brunvand -- DeWitt	Arts Coding for Social Good: A Pilot Project for Middle-School Outreach.	Anita DeWitt; Julia Fay; Madeleine Goldman; Eleanor Nicolson; Linda Oyolu; Lukas Resch; Jovan Martinez Saldaña; Soulideth Sounalath; Tyler Williams; Kathryn Yetter; Elizabeth Zak; Narren Brown; Samuel A. Rebelsky	https://doi.org/10.1145/3017680.3017795	TRUE
conf/sigcse/sigcse2017	SIGSCE	2017	703	1	Posters: Alphonce -- Haynie	Studying Implementation of Secondary Introductory Computer Science: Pilot Results (Abstract Only).	Marie A. Bienkowski; Eric Snow	https://doi.org/10.1145/3017680.3022432	FALSE
conf/sigcse/sigcse2017	SIGCSE	2017	213-218	6	Papers: Dickson -- Ginat	Assessing and Teaching Scope, Mutation, and Aliasing in Upper-Level Undergraduates.	Kathi Fisler; Shriram Krishnamurthi; Preston Tunnell Wilson	https://doi.org/10.1145/3017680.3017777	TRUE
conf/sigcse/sigcse2017	SIGSCE	2017	641	1	Demo Sessions	Submitty: An Open Source, Highly-Configurable Platform for Grading of Programming Assignments (Abstract Only).	Matthew Peveler; Jeramey Tyler; Samuel Breese; Barbara Cutler; Ana Milanova	https://doi.org/10.1145/3017680.3022384	FALSE
conf/sigcse/sigcse2017	SIGCSE	2017	279-284	6	Papers: Graves -- Khuri	Assessing Children's Understanding of the Work of Computer Scientists: The Draw-a-Computer-Scientist Test.	Alexandria K. Hansen; Hilary A. Dwyer; Ashley Iveland; Mia Talesfore; Lacy Wright; Danielle Boyd Harlow; Diana Franklin	https://doi.org/10.1145/3017680.3017769	TRUE
conf/sigcse/sigcse2017	SIGCSE	2017	501-506	6	Papers: Pollock -- Smith	Assessing Computational Thinking in CS Unplugged Activities.	Brandon Rodriguez; Stephen Kennicutt; Cyndi Rader; Tracy Camp	https://doi.org/10.1145/3017680.3017779	TRUE
conf/sigcse/sigcse2017	SIGCSE	2017	519-524	6	Papers: Pollock -- Smith	Assessment of Introducing Algorithms with Video Lectures and Pseudocode Rhymed to a Melody.	Benjamin J. Schreiber; John P. Dougherty	https://doi.org/10.1145/3017680.3017789	TRUE
conf/sigcse/sigcse2017	SIGCSE	2017	189-194	6	Papers: Dickson -- Ginat	Automatically Classifying Students in Need of Support by Detecting Changes in Programming Behaviour.	Anthony Estey; Hieke Keuning; Yvonne Coady	https://doi.org/10.1145/3017680.3017790	TRUE
conf/sigcse/sigcse2017	SIGSCE	2017	727	1	Birds of a Feather: Hawthorne -- Pollock	Surviving "Open-ended Projects" in Project-Based Learning: A Teacher's Perspective (Abstract Only).	Tina J. Ostrander; Ruby ElKharboutly; Karen Jin	https://doi.org/10.1145/3017680.3022345	FALSE
conf/sigcse/sigcse2017	SIGSCE	2017	723	1	Birds of a Feather: Bates -- Garcia	Sustainable Methods for Impactful Service Learning in Computer Science (Abstract Only).	Nate Derbinsky; Durga Suresh	https://doi.org/10.1145/3017680.3022346	FALSE
conf/sigcse/sigcse2017	SIGSCE	2017	751-752	2	ACM Student Research Competition -- Undergraduate	Tapped-based Authentication for Mobile Device Security.	Lukasz Brodowski; Cameron Dziurgot; Donald Moretz	https://doi.org/10.1145/3017680.3022453	FALSE
conf/sigcse/sigcse2017	SIGSCE	2017	700	1	Lightning Talks	Teach Access: Preparing Computing Students for Industry (Abstract Only).	Megan Lawrence; Mary Bellard	https://doi.org/10.1145/3017680.3022392	FALSE
conf/sigcse/sigcse2017	SIGSCE	2017	699	1	Lightning Talks	Teach Global Impact: A Resource for CSP (or Any CS Class!) (Abstract Only).	Julia Bernd; Jonathan Corley	https://doi.org/10.1145/3017680.3022397	FALSE
conf/sigcse/sigcse2017	SIGSCE	2017	783-784	2	ACM Student Research Competition -- Undergraduate	Teacher Configurable Coding Challenges for Block Languages.	Nath Tumlin	https://doi.org/10.1145/3017680.3022467	FALSE
conf/sigcse/sigcse2017	SIGSCE	2017	691-692	2	Special Sessions	Teaching Accessibility.	Richard E. Ladner; Matt May	https://doi.org/10.1145/3017680.3017804	FALSE
conf/sigcse/sigcse2017	SIGSCE	2017	721	1	Birds of a Feather: Bates -- Garcia	Teaching and Learning Under Pressure: Intensive (Accelerated, Block) Computer Science Courses (Abstract Only).	Janet Burge; Bo Brinkman	https://doi.org/10.1145/3017680.3022350	FALSE
conf/sigcse/sigcse2017	SIGSCE	2017	177-181	5	Papers: Dickson -- Ginat	Teaching Big Data and Cloud Computing with a Physical Cluster.	Jesse Eickholt; Sharad Shrestha	https://doi.org/10.1145/3017680.3017705	FALSE
conf/sigcse/sigcse2017	SIGCSE	2017	291-296	6	Papers: Graves -- Khuri	Building a Statewide Computer Science Teacher Pipeline.	Helen H. Hu; Cecily Heiner; Thomas Gagne; Carl Lyman	https://doi.org/10.1145/3017680.3017788	TRUE
conf/sigcse/sigcse2017	SIGSCE	2017	734	1	Workshops: Amato -- Gunawardena	Teaching Distributed Computing with WorkQueue (Abstract Only).	Aaron Dingler; Peter Bui	https://doi.org/10.1145/3017680.3017838	FALSE
conf/sigcse/sigcse2017	SIGCSE	2017	225-230	6	Papers: Dickson -- Ginat	Capture the Flag Unplugged: an Offline Cyber Competition.	Vitaly Ford; Ambareen Siraj; Ada Haynes; Eric L. Brown	https://doi.org/10.1145/3017680.3017783	TRUE
conf/sigcse/sigcse2017	SIGSCE	2017	741	1	Workshops: Matthews -- Winter	Teaching Parallel Computing with OpenMP on the Raspberry Pi (Abstract Only).	Suzanne J. Matthews; Joel C. Adams; Richard A. Brown; Elizabeth Shoop	https://doi.org/10.1145/3017680.3017818	FALSE
conf/sigcse/sigcse2017	SIGSCE	2017	661-662	2	Panels	Teaching the Global Impact of Computing.	Jeff Gray; Jennifer Rosato; Bradley Beth; Nigamanth Sridhar	https://doi.org/10.1145/3017680.3017696	FALSE
conf/sigcse/sigcse2017	SIGSCE	2017	731	1	Birds of a Feather: Price -- Yongpradit	Teaching Track Faculty in CS (Abstract Only).	Mark Sherriff; Christopher Gregg; Shawn Lupoli	https://doi.org/10.1145/3017680.3022361	FALSE
conf/sigcse/sigcse2017	SIGCSE	2017	75-80	6	Papers: Aggarwal -- Broll	Choosing Face-to-face or Video-based Instruction in a Mobile App Development Course.	Matthew R. Boutell	https://doi.org/10.1145/3017680.3017774	TRUE
conf/sigcse/sigcse2017	SIGSCE	2017	659-660	2	Panels	Technology We Can't Live Without!: revisited.	Ria Galanos; Whitaker Brand; Sumukh Sridhara; Mike Zamansky; Evelyn Zayas	https://doi.org/10.1145/3017680.3017691	FALSE
conf/sigcse/sigcse2017	SIGSCE	2017	738	1	Workshops: Heckman -- Martin	Testing Across the Curriculum (Abstract Only).	Zachary Kurmas	https://doi.org/10.1145/3017680.3017817	FALSE
conf/sigcse/sigcse2017	SIGSCE	2017	721	1	Birds of a Feather: Bates -- Garcia	The ACM Code of Ethics and Professional Conduct: Teaching Strategies and the Coming Update (Abstract Only).	Bo Brinkman; Karla Carter	https://doi.org/10.1145/3017680.3022340	FALSE
conf/sigcse/sigcse2017	SIGSCE	2017	747-748	2	ACM Student Research Competition -- Undergraduate	The Application of the 2D Structure Tensor in Visual Arts and Design.	Alec Battles	https://doi.org/10.1145/3017680.3022465	FALSE
conf/sigcse/sigcse2017	SIGSCE	2017	679-680	2	Special Sessions	The Code of Ethics Quiz Show.	Bo Brinkman; Keith W. Miller	https://doi.org/10.1145/3017680.3017803	FALSE
conf/sigcse/sigcse2017	SIGCSE	2017	447-452	6	Papers: Maxwell -- Pierce	Computer Science Outreach with End-User Robot-Programming Tools.	Vivek Paramasivam; Justin Huang; Sarah Elliott; Maya Cakmak	https://doi.org/10.1145/3017680.3017796	TRUE
conf/sigcse/sigcse2017	SIGSCE	2017	3	1	Keynote Addresses	The Educator Identity and its Impact.	Mats Daniels	https://doi.org/10.1145/3017680.3025048	FALSE
conf/sigcse/sigcse2017	SIGCSE	2017	57-62	6	Papers: Aggarwal -- Broll	Computing with CORGIS: Diverse, Real-world Datasets for Introductory Computing.	Austin Cory Bart; Ryan Whitcomb; Dennis G. Kafura; Clifford A. Shaffer; Eli Tilevich	https://doi.org/10.1145/3017680.3017708	TRUE
conf/sigcse/sigcse2017	SIGCSE	2017	453-458	6	Papers: Maxwell -- Pierce	Concepts and Practices: Designing and Developing A Modern K-12 CS Framework.	Miranda C. Parker; Leigh Ann DeLyser	https://doi.org/10.1145/3017680.3017778	TRUE
conf/sigcse/sigcse2017	SIGCSE	2017	147-152	6	Papers: Brunvand -- DeWitt	Creating Engaging Exercises With Mobile Response System (MRS).	Debzani Deb; Mohammad Muztaba Fuad; Mallek Kanan	https://doi.org/10.1145/3017680.3017793	TRUE
conf/sigcse/sigcse2017	SIGCSE	2017	183-188	6	Papers: Dickson -- Ginat	Creativity in Authentic STEAM Education with EarSketch.	Shelly Engelman; Brian Magerko; Tom McKlin; Morgan Miller; Doug Edwards; Jason Freeman	https://doi.org/10.1145/3017680.3017763	TRUE
conf/sigcse/sigcse2017	SIGSCE	2017	639	1	Demo Sessions	The Micro: bit: Hands-on Computing for the New Generation (Abstract Only).	Thomas Ball; Judith Bishop; Jonathan de Halleux	https://doi.org/10.1145/3017680.3022381	FALSE
conf/sigcse/sigcse2017	SIGSCE	2017	673-674	2	Panels	The Passion, Beauty, and Joy of Teaching and Learning Cybersecurity.	Richard S. Weiss; Casey W. O'Brien; Xenia Mountrouidou; Jens Mache	https://doi.org/10.1145/3017680.3017692	FALSE
conf/sigcse/sigcse2017	SIGSCE	2017	721	1	Birds of a Feather: Bates -- Garcia	The Power of Analogies in Introductory CS Education (Abstract Only).	Yingjun Cao; Scott D. Anderson	https://doi.org/10.1145/3017680.3022375	FALSE
conf/sigcse/sigcse2017	SIGSCE	2017	641	1	Demo Sessions	The Quorum Programming Language (Abstract Only).	Andreas Stefik; Richard E. Ladner	https://doi.org/10.1145/3017680.3022377	FALSE
conf/sigcse/sigcse2017	SIGCSE	2017	141-146	6	Papers: Brunvand -- DeWitt	Cybersecurity for Future Presidents: An Interdisciplinary Non-majors Course.	Aparna Das; David Voorhees; Cynthia Choi; Carl E. Landwehr	https://doi.org/10.1145/3017680.3017713	TRUE
conf/sigcse/sigcse2017	SIGSCE	2017	663-664	2	Panels	The Role of CS Departments in The US President's "CS for All" Initiative.	Mark Guzdial; Barbara Ericson; W. Richards Adrion; Megean Garvin	https://doi.org/10.1145/3017680.3017684	FALSE
conf/sigcse/sigcse2017	SIGCSE	2017	603-608	6	Papers: Sohoni -- Weintrop	Deconstructing the Discussion Forum: Student Questions and Computer Science Learning.	Mickey Vellukunnel; Philip Sheridan Buffum; Kristy Elizabeth Boyer; Jeffrey Forbes; Sarah Heckman; Ketan Mayer-Patel	https://doi.org/10.1145/3017680.3017745	TRUE
conf/sigcse/sigcse2017	SIGCSE	2017	627-632	6	Papers: Sohoni -- Weintrop	Defining a Discipline or Shaping a Community: Constraints on Broadening Participation in Computing.	Joanna Weidler-Lewis; Wendy M. DuBow; Alexis Kaminsky	https://doi.org/10.1145/3017680.3017776	TRUE
conf/sigcse/sigcse2017	SIGSCE	2017	706	1	Posters: Alphonce -- Haynie	ThoTh Lab: A Personalized Learning Framework for CS Hands-on Projects (Abstract Only).	Yuli Deng; Dijiang Huang; Chun-Jen Chung	https://doi.org/10.1145/3017680.3022442	FALSE
conf/sigcse/sigcse2017	SIGSCE	2017	755-756	2	ACM Student Research Competition -- Undergraduate	Time Lord: Covert Timing Channel Implementation and Realistic Experimentation.	Eduardo J. Castillo; Xenia Mountrouidou; Xiangyang Li	https://doi.org/10.1145/3017680.3022463	FALSE
conf/sigcse/sigcse2017	SIGCSE	2017	615-620	6	Papers: Sohoni -- Weintrop	Diversity Barriers in K-12 Computer Science Education: Structural and Social.	Jennifer Wang; Sepehr Hejazi Moghadam	https://doi.org/10.1145/3017680.3017734	TRUE
conf/sigcse/sigcse2017	SIGCSE	2017	465-470	6	Papers: Maxwell -- Pierce	Do Enhanced Compiler Error Messages Help Students?: Results Inconclusive.	Raymond S. Pettit; John Homer; Roger Gee	https://doi.org/10.1145/3017680.3017768	TRUE
conf/sigcse/sigcse2017	SIGSCE	2017	743	1	Workshops: Matthews -- Winter	Two Birds: Teaching Coding and Math in Primary Schools and Beyond (Abstract Only).	Victor Winter; Betty Love	https://doi.org/10.1145/3017680.3017815	FALSE
conf/sigcse/sigcse2017	SIGCSE	2017	411-416	6	Papers: Maxwell -- Pierce	Eliminating Gender Bias in Computer Science Education Materials.	Paola Medel; Vahab Pournaghshband	https://doi.org/10.1145/3017680.3017794	TRUE
conf/sigcse/sigcse2017	SIGCSE	2017	63-68	6	Papers: Aggarwal -- Broll	Employing Retention of Flow to Improve Online Tutorials.	Ashok R. Basawapatna; Alexander Repenning	https://doi.org/10.1145/3017680.3017799	TRUE
conf/sigcse/sigcse2017	SIGSCE	2017	749-750	2	ACM Student Research Competition -- Undergraduate	Urban Archivist Application.	James W. Belford	https://doi.org/10.1145/3017680.3022462	FALSE
conf/sigcse/sigcse2017	SIGCSE	2017	333-338	6	Papers: Kim -- Lovellette	Evaluating an Alternative CS1 for Students with Prior Programming Experience.	Michael S. Kirkpatrick; Chris Mayfield	https://doi.org/10.1145/3017680.3017759	TRUE
conf/sigcse/sigcse2017	SIGSCE	2017	741	1	Workshops: Matthews -- Winter	Using and Customizing Open-Source Runestone Ebooks for Computer Science Classes (Abstract Only).	Bradley N. Miller; Paul Resnick; Barbara Ericson	https://doi.org/10.1145/3017680.3017814	FALSE
conf/sigcse/sigcse2017	SIGSCE	2017	740	1	Workshops: Heckman -- Martin	Using AppVis to Build Data-rich Apps with MIT App Inventor (Abstract Only).	Fred Martin; Samantha Michalka; Harry Zhu; Jere Boudelle	https://doi.org/10.1145/3017680.3017827	FALSE
conf/sigcse/sigcse2017	SIGCSE	2017	111-116	6	Papers: Brunvand -- DeWitt	Evaluating Neural Networks as a Method for Identifying Students in Need of Assistance.	Karo Castro-Wunsch; Alireza Ahadi; Andrew Petersen	https://doi.org/10.1145/3017680.3017792	TRUE
conf/sigcse/sigcse2017	SIGCSE	2017	99-104	6	Papers: Brunvand -- DeWitt	Evaluating Student Learning from Collaborative Group Tests in Introductory Computing.	Yingjun Cao; Leo Porter	https://doi.org/10.1145/3017680.3017729	TRUE
conf/sigcse/sigcse2017	SIGCSE	2017	43722	6	Papers: Aggarwal -- Broll	Evaluating the Effect of Using Physical Manipulatives to Foster Computational Thinking in Elementary School.	Ashish Aggarwal; Christina Gardner-McCune; David S. Touretzky	https://doi.org/10.1145/3017680.3017791	TRUE
conf/sigcse/sigcse2017	SIGSCE	2017	714	1	Posters: Hovemeyer -- Miller	Using Professional Development to Move Toward a Guided Discovery Approach in the Classroom (Abstract Only).	Susan B. Miller	https://doi.org/10.1145/3017680.3022406	FALSE
conf/sigcse/sigcse2017	SIGCSE	2017	201-206	6	Papers: Dickson -- Ginat	Evaluating the Effectiveness of Algorithm Analysis Visualizations.	Mohammed F. Farghally; Kyu Han Koh; Hossameldin Shahin; Clifford A. Shaffer	https://doi.org/10.1145/3017680.3017698	TRUE
conf/sigcse/sigcse2017	SIGSCE	2017	791-792	2	ACM Student Research Competition -- Undergraduate	Using Scratch and Female Role Models while Storytelling Improves Fifth-Grade Students' Attitudes toward Computing.	Raza Zaidi; Isabel Freihofer; Gloria Childress Townsend	https://doi.org/10.1145/3017680.3022451	FALSE
conf/sigcse/sigcse2017	SIGSCE	2017	704	1	Posters: Alphonce -- Haynie	Using Static Analysis for Automated Assignment Grading in Introductory Programming Classes (Abstract Only).	Samuel Breese; Ana Milanova; Barbara Cutler	https://doi.org/10.1145/3017680.3022440	FALSE
conf/sigcse/sigcse2017	SIGSCE	2017	727	1	Birds of a Feather: Hawthorne -- Pollock	Using Tangible Manipulatives for Hands-on Activities in Undergraduate Computer Science Classes (Abstract Only).	Stephanie Ludi; Stan Kurkovsky	https://doi.org/10.1145/3017680.3022349	FALSE
conf/sigcse/sigcse2017	SIGSCE	2017	702	1	Lightning Talks	Using the 5 Practices to Improve Facilitation of POGIL Activities (Abstract Only).	Dee A. B. Weikle	https://doi.org/10.1145/3017680.3022390	FALSE
conf/sigcse/sigcse2017	SIGCSE	2017	525-530	6	Papers: Pollock -- Smith	Evaluation and Impact of a Required Computational Thinking Course for Architecture Students.	Nick Senske	https://doi.org/10.1145/3017680.3017750	TRUE
conf/sigcse/sigcse2017	SIGCSE	2017	573-578	6	Papers: Sohoni -- Weintrop	Exam Wrappers: Not a Silver Bullet.	Ben Stephenson; Michelle Craig; Daniel Zingaro; Diane Horton; Danny Heap; Elaine Huynh	https://doi.org/10.1145/3017680.3017701	TRUE
conf/sigcse/sigcse2017	SIGCSE	2017	513-518	6	Papers: Pollock -- Smith	Examining the Enrollment Growth: Non-CS Majors in CS1 Courses.	Linda J. Sax; Kathleen J. Lehman; Christina Zavala	https://doi.org/10.1145/3017680.3017781	TRUE
conf/sigcse/sigcse2017	SIGSCE	2017	733	1	Workshops: Amato -- Gunawardena	UTeach CS Principles: Broadening Participation Through K-12 Computer Science Education and Teacher Professional Learning and Support (Abstract Only).	Bradley Beth; Amy Moreland	https://doi.org/10.1145/3017680.3017830	FALSE
conf/sigcse/sigcse2017	SIGCSE	2017	69-74	6	Papers: Aggarwal -- Broll	Examining the Relationship Between Introductory Computing Course Experiences, Self-Efficacy, and Belonging Among First-Generation College Women.	Jennifer M. Blaney; Jane G. Stout	https://doi.org/10.1145/3017680.3017751	TRUE
[truncated: 480 more rows]

## Sheet: Phase 1 (953 papers)
paper identifier	conference identifier	venue	year	page_range	pages_number	heading	title	authors	electronic_edition	Qualifies for Phase 2 (K12 subjects AND involves programming activities)
[truncated: 953 more rows]

[truncated: 2 more sheets: Phase 2 (132 papers-143studies), wipcse-papers-plus-analyze]
